# Supplementary material for: Prevalence of Physical Symptoms and Burnout Syndrome in Healthcare Professionals after One Year of Pandemic: Study #COVID 19PS
Source: Preprints.org preprint supplement (doi:10.20944/preprints202209.0400.v1), 2022-09-26
Supplement: Supplementary file 1 [file supplementary]

## Sheet: Sheet1
ID	Hora_inici	Hora_fi	Tiempo	Lengua	Sexo	Edad	Continente	País	CCAA_Estado	Ambito	Centro	Profesión	Profesión5	Antigüedad	Atencion_dir	Atencion_presenc_dir	padecido_COVID	padecido_COVID_SiNo	Entrada_laboral	Baja_por_COVID	Sint_total	Sint_gral	Sint_CV	Sint_resp	Sint_Gastroint	Sint_musculoesq	Sint_neurol	Sint_cutan	Sint_ORL	Sint_oft	Subesc_Agotam_Emoc	Subesc_Despers	Subesc_Realiz	Maslach_Total	Subesc_Realiz_3categ	Subesc_Agot_3categ	Subesc_Despers_3categ	Maslach_Total_3categ	Maslach1	Maslach2	Maslach3	Maslach4	Maslach5	Maslach6	Maslach7	Maslach8	Maslach9	Maslach10	Maslach11
300	2021-01-30 21:08:14	2021-01-30 21:13:56	00:05:41.021000	1	2	2	1	5	Catalunya	2	3	10	10	3	2	2	3	2	No	Sí, por problemas de salud físicos	0	4	4	0	0	0	4	4	4	0	31	0	36	67	2	1	3	3	1	6	2	6	0	3	6	4	5	0	0
12	2021-01-29 14:28:07	2021-01-29 14:37:07	00:09:00	2	1	4	1	5	Catalunya	2	7	7	7	4	2	2	2	1	No	Sí, por confinamiento por contacto estrecho o sospecha de COVID-19	1	0	0	0	0	0	0	0	0	0	36	1	37	74	2	1	3	3	6	6	6	6	0	1	3	6	6	0	1
133	2021-01-30 09:45:10	2021-01-30 09:55:09	00:09:57.974000	1	1	2	1	5	Catalunya	1	4	4	4	2	1	1	2	1	No	Sí, por confinamiento por contacto estrecho o sospecha de COVID-19	1	0	0	0	0	0	0	0	0	0	21	2	45	68	3	2	3	3	1	5	4	6	0	1	5	1	6	0	1
448	2021-01-31 00:39:41	2021-01-31 00:47:38	00:07:57.014000	1	2	1	1	5	Madrid	1	4	10	10	1	1	1	2	1	No	No	0	0	2	0	2	1	2	1	0	0	40	10	41	91	3	1	1	3	5	5	5	6	0	2	5	6	6	3	4
516	2021-01-31 10:49:37	2021-01-31 11:01:47	00:12:11.030000	1	2	3	1	5	Canarias	2	6	10	10	3	1	1	2	1	No	Sí, por problemas de salud físicos	0	2	0	0	0	2	2	1	2	0	23	11	37	71	2	2	1	3	3	2	5	4	5	1	1	2	6	1	5
1152	2021-02-07 12:49:33	2021-02-07 12:54:36	00:05:01.968000	2	2	2	1	5	Catalunya	2	6	7	7	3	2	2	1	1	No	No	1	0	0	0	0	0	0	0	0	0	17	5	42	64	3	3	3	2	0	5	4	6	0	0	0	2	6	4	0
142	2021-01-30 10:44:46	2021-01-30 10:50:19	00:05:32.035000	1	2	4	1	5	Catalunya	2	2	7	7	1	3	1	1	1	No	No	1	0	0	0	0	0	0	0	0	0	52	21	31	104	2	1	1	3	6	6	6	6	6	6	5	6	6	5	5
143	2021-01-30 10:44:46	2021-01-30 10:50:19	00:05:32.035000	1	2	4	1	5	Catalunya	2	2	7	7	1	3	1	1	1	No	No	1	0	0	0	0	0	0	0	0	0	52	21	31	104	2	1	1	3	6	6	6	6	6	6	5	6	6	5	5
551	2021-01-31 13:13:09	2021-01-31 13:23:48	00:10:39.014000	2	2	3	1	5	Catalunya	1	3	10	10	3	2	2	3	2	No	Sí, por problemas de salud físicos	0	4	4	4	4	4	4	4	4	4	48	2	40	90	2	1	3	3	6	6	6	6	0	6	5	6	6	1	1
83	2021-01-29 19:57:29	2021-01-29 20:04:18	00:06:49.018000	1	2	1	1	5	Catalunya	2	8	13	14	1	1	1	1	1	No	No	0	1	2	0	0	0	1	1	0	0	46	13	12	71	1	1	1	3	4	6	6	3	6	5	2	6	1	3	1
767	2021-02-01 17:04:29	2021-02-01 17:10:19	00:05:50.006000	1	1	1	1	5	Comunitat Valenciana	1	4	4	4	1	1	1	1	1	No	No	0	0	0	1	1	0	0	1	1	0	22	6	31	59	2	2	2	2	1	1	2	4	1	5	3	3	5	1	1
899	2021-02-01 23:54:55	2021-02-02 00:08:25	00:13:30	2	2	1	1	5	Catalunya	1	4	4	4	2	1	1	1	1	No	No	1	0	0	0	0	0	0	0	0	0	17	11	39	67	2	3	1	3	1	2	2	6	0	3	3	2	6	4	4
760	2021-02-01 16:32:54	2021-02-01 16:47:35	00:14:41.021000	1	2	2	1	5	Castilla-La Mancha	2	4	7	7	2	1	1	4	2	No	Sí, por problemas de salud físicos	0	0	0	0	0	2	0	1	0	0	36	13	41	90	3	1	1	3	4	6	5	4	0	5	6	5	5	3	5
114	2021-01-29 23:28:17	2021-01-29 23:36:58	00:08:40.992000	1	2	4	1	5	Catalunya	2	3	4	4	3	2	2	3	2	No	Sí, por problemas de salud físicos	1	0	0	0	0	0	0	0	0	0	0	0	0	0	1	3	3	1	#NULL!	#NULL!	#NULL!	#NULL!	#NULL!	#NULL!	#NULL!	#NULL!	#NULL!	#NULL!	#NULL!
799	2021-02-01 20:03:59	2021-02-01 20:15:59	00:12:01.008000	1	2	4	1	5	Cantabria	2	8	1	14	4	2	2	1	1	No	No	0	0	0	0	0	0	2	0	0	0	37	14	42	93	3	1	1	3	6	6	5	6	0	3	6	1	6	5	6
623	2021-01-31 22:08:58	2021-01-31 22:21:48	00:12:49.997000	1	2	3	1	5	Catalunya	1	6	2	2	4	2	2	3	2	No	Sí, por problemas de salud físicos	0	4	0	4	4	4	4	0	4	0	32	6	37	75	2	1	2	3	6	6	6	6	0	0	1	5	6	0	0
493	2021-01-31 09:47:35	2021-01-31 09:56:54	00:09:19.958000	1	2	2	1	5	Catalunya	2	2	2	2	4	1	1	1	1	No	No	1	0	0	0	0	0	0	0	0	0	31	10	37	78	2	1	1	3	2	5	3	6	0	4	1	4	3	5	4
92	2021-01-29 20:30:28	2021-01-29 20:40:39	00:10:11.021000	1	2	3	1	5	Catalunya	2	6	2	2	4	2	2	1	1	No	No	1	0	0	0	0	0	0	0	0	0	21	1	18	40	1	2	3	2	1	5	5	6	0	1	0	5	0	1	0
1049	2021-02-03 14:33:24	2021-02-03 14:45:25	00:12:01.958000	1	2	1	1	5	Madrid	2	16	2	2	2	2	2	1	1	No	No	0	0	2	0	0	1	2	0	0	0	21	7	38	66	2	2	2	2	4	5	4	6	0	2	6	2	5	2	2
732	2021-02-01 15:06:54	2021-02-01 15:12:25	00:05:29.962000	2	2	3	1	5	Catalunya	2	2	7	7	4	2	2	3	2	No	Sí, por confinamiento por contacto estrecho o sospecha de COVID-19	0	4	4	4	0	0	4	0	0	0	16	9	37	62	2	3	2	2	3	3	3	3	1	1	4	1	5	1	1
236	2021-01-30 18:06:42	2021-01-30 18:13:26	00:06:44.006000	1	2	1	1	5	Catalunya	2	2	13	14	1	3	1	2	1	Sí, anteriormente estaba sin actividad laboral	No	0	2	0	0	0	0	2	0	0	0	49	19	17	85	1	1	1	3	6	5	5	4	5	6	5	6	0	4	3
324	2021-01-30 21:48:55	2021-01-30 21:56:35	00:07:38.957000	1	2	1	1	5	La Rioja	1	3	10	10	1	2	2	2	1	Sí, por primera vez en mi vida	Sí, por confinamiento por contacto estrecho o sospecha de COVID-19	0	2	0	0	0	0	0	0	0	0	54	27	35	116	2	1	1	3	6	6	6	4	4	6	4	6	6	6	6
764	2021-02-01 16:53:50	2021-02-01 17:03:11	00:09:20.995000	1	1	4	1	5	Catalunya	2	3	13	14	4	2	2	1	1	No	No	0	2	2	2	0	0	0	0	0	0	36	14	24	74	1	1	1	3	5	6	6	6	0	1	6	6	2	5	6
414	2021-01-30 23:14:18	2021-01-30 23:17:52	00:03:34.963000	1	2	1	1	5	Galicia	2	17	10	10	1	1	1	1	1	Sí, anteriormente estaba sin actividad laboral	No	1	0	0	0	0	0	0	0	0	0	29	9	29	67	1	1	2	3	3	5	3	2	0	0	6	4	3	5	3
265	2021-01-30 19:51:51	2021-01-30 20:04:22	00:12:30.038000	2	1	3	1	5	Catalunya	2	2	11	14	4	2	2	3	2	No	Sí, por problemas de salud físicos	0	4	0	4	4	4	0	0	0	4	23	7	42	72	3	2	2	3	2	5	2	6	0	3	6	3	6	1	4
965	2021-02-02 16:00:24	2021-02-02 16:09:28	00:09:03.024000	2	2	2	1	5	Catalunya	1	3	9	14	3	2	2	1	1	No	No	0	0	2	0	0	2	2	1	0	0	14	1	45	60	3	3	3	2	1	4	2	6	0	0	4	4	6	0	0
20	2021-01-29 14:53:47	2021-01-29 15:13:30	00:19:42.989000	2	2	2	1	5	Catalunya	2	9	2	2	3	2	2	1	1	No	No	1	0	0	0	0	0	0	0	0	0	43	11	46	100	3	1	1	3	6	6	6	6	0	1	6	6	6	1	5
637	2021-02-01 08:12:52	2021-02-01 08:22:41	00:09:48.989000	1	1	3	1	5	Catalunya	1	10	1	14	4	1	1	1	1	No	No	0	0	0	0	0	2	0	0	0	0	29	18	40	87	2	1	1	3	3	5	5	6	6	0	5	6	6	6	6
233	2021-01-30 17:16:25	2021-01-30 17:31:24	00:14:58.992000	1	2	4	1	5	Catalunya	1	1	10	10	4	1	1	1	1	No	No	1	0	0	0	0	0	0	0	0	0	15	0	47	62	3	3	3	2	1	5	5	6	0	0	6	1	6	0	0
153	2021-01-30 11:11:48	2021-01-30 11:22:18	00:10:30.979000	1	2	1	1	5	Catalunya	1	4	5	14	1	2	2	1	1	No	No	1	0	0	0	0	0	0	0	0	0	9	5	38	52	2	3	3	2	0	3	2	6	0	1	6	0	6	5	0
395	2021-01-30 22:47:25	2021-01-30 22:55:31	00:08:07.037000	1	2	2	1	5	Castilla-La Mancha	1	3	1	14	2	2	2	1	1	No	No	0	1	0	0	1	1	0	0	0	0	37	0	42	79	3	1	3	3	6	6	6	6	0	0	6	6	6	0	0
594	2021-01-31 18:20:43	2021-01-31 18:31:42	00:10:58.022000	2	2	1	2	4		1	4	10	10	1	1	1	3	2	No	No	0	2	0	4	4	1	0	0	4	0	44	8	35	87	2	1	2	3	5	6	5	6	1	5	5	5	6	3	1
225	2021-01-30 16:37:10	2021-01-30 16:48:36	00:11:26.966000	1	2	1	1	5	Catalunya	2	2	7	7	1	2	2	1	1	No	No	0	0	0	1	2	0	2	1	1	2	46	14	22	82	1	1	1	3	6	6	5	3	6	5	5	6	4	3	3
390	2021-01-30 22:36:18	2021-01-30 22:52:38	00:16:20.986000	1	2	4	1	5	Aragón	2	7	1	14	2	2	2	1	1	No	No	0	0	0	0	0	2	0	1	0	0	8	2	37	47	2	3	3	2	0	6	0	6	0	0	1	1	6	1	1
806	2021-02-01 20:29:17	2021-02-01 20:35:01	00:05:44.995000	1	2	3	1	5	Catalunya	1	3	13	14	4	2	2	1	1	Sí, por primera vez en mi vida	Sí, por problemas de salud físicos	1	0	0	0	0	0	0	0	0	0	54	30	45	129	3	1	1	3	6	6	6	6	6	6	6	6	6	6	6
610	2021-01-31 20:29:27	2021-01-31 20:37:31	00:08:04.963000	1	2	4	1	5	Murcia	2	6	1	14	4	2	2	1	1	No	Sí, por problemas de salud físicos	0	0	1	0	0	1	1	0	0	0	31	10	30	71	1	1	1	3	3	6	6	6	0	0	6	6	6	5	5
435	2021-01-30 23:44:07	2021-01-30 23:53:14	00:09:05.962000	1	2	4	1	5	Catalunya	2	6	1	14	4	2	2	1	1	No	No	0	0	0	0	0	2	0	0	0	0	34	7	36	77	2	1	2	3	6	6	1	6	3	0	1	6	6	2	2
771	2021-02-01 17:28:38	2021-02-01 17:36:04	00:07:25.997000	1	2	4	1	5	Castilla y León	2	2	2	2	4	2	2	1	1	No	Sí, por problemas de salud psíquicos	0	2	0	0	2	2	2	0	0	0	51	9	27	87	1	1	2	3	6	6	6	6	5	6	5	6	4	1	1
167	2021-01-30 11:53:48	2021-01-30 12:03:01	00:09:12.960000	1	2	4	1	5	Catalunya	2	2	7	7	4	1	1	1	1	No	Sí, por confinamiento por contacto estrecho o sospecha de COVID-19	1	0	0	0	0	0	0	0	0	0	0	0	0	0	1	3	3	1	#NULL!	#NULL!	#NULL!	#NULL!	#NULL!	#NULL!	#NULL!	#NULL!	#NULL!	#NULL!	#NULL!
986	2021-02-02 19:17:27	2021-02-02 19:25:35	00:08:07.987000	1	1	4	1	5	Catalunya	1	4	7	7	4	3	1	2	1	No	Sí, por confinamiento por contacto estrecho o sospecha de COVID-19	1	0	0	0	0	0	0	0	0	0	45	21	32	98	2	1	1	3	4	5	4	3	2	5	5	5	6	5	6
85	2021-01-29 20:01:42	2021-01-29 20:08:10	00:06:28.973000	1	2	3	1	5	Cantabria	2	6	2	2	3	2	2	2	1	No	No	0	2	2	0	0	0	2	1	0	1	40	5	32	77	2	1	3	3	6	6	6	6	0	3	6	6	6	1	1
1021	2021-02-03 09:18:19	2021-02-03 09:25:48	00:07:29.021000	1	2	1	1	5	La Rioja	1	3	10	10	1	3	1	1	1	No	No	0	0	0	0	0	2	2	1	0	0	17	5	25	47	1	3	3	2	2	5	3	4	1	0	2	2	5	2	2
941	2021-02-02 10:59:26	2021-02-02 11:06:08	00:06:42.019000	1	1	1	1	5	Andalucía	1	4	4	4	1	1	1	1	1	No	No	0	1	0	0	1	0	1	1	1	0	33	2	33	68	2	1	3	3	5	5	4	6	0	1	6	5	5	1	1
946	2021-02-02 12:06:19	2021-02-02 12:18:12	00:11:52.973000	1	2	2	1	5	Madrid	2	7	4	4	3	2	2	2	1	No	Sí, por confinamiento por contacto estrecho o sospecha de COVID-19	0	0	2	2	0	0	2	1	0	0	21	7	46	74	3	2	2	3	4	5	3	6	5	1	6	4	6	1	0
506	2021-01-31 10:17:08	2021-01-31 10:35:22	00:18:12.960000	1	2	1	1	5	Murcia	1	3	10	10	1	1	1	1	1	No	No	1	0	0	0	0	0	0	0	0	0	17	4	36	57	2	3	3	2	1	3	4	6	1	1	5	1	5	1	1
836	2021-02-01 21:00:48	2021-02-01 21:21:42	00:20:54.960000	1	2	4	1	5	Catalunya	2	2	2	2	4	2	2	3	2	No	Sí, por problemas de salud psíquicos	1	0	0	0	0	0	0	0	0	0	0	0	0	0	1	3	3	1	#NULL!	#NULL!	#NULL!	#NULL!	#NULL!	#NULL!	#NULL!	#NULL!	#NULL!	#NULL!	#NULL!
897	2021-02-01 23:48:30	2021-02-02 00:00:31	00:11:59.971000	1	2	1	1	5	Catalunya	1	6	1	14	2	2	2	1	1	Sí, por primera vez en mi vida	No	0	0	1	0	0	1	0	0	0	0	23	11	35	69	2	2	1	3	1	4	1	6	1	1	6	2	3	6	4
686	2021-02-01 13:15:41	2021-02-01 13:23:59	00:08:18.010000	1	2	1	1	5	Principado de Asturias	2	3	10	10	2	2	2	2	1	No	No	1	0	0	0	0	0	0	0	0	0	14	6	48	68	3	3	2	3	3	1	1	6	0	1	6	1	6	3	2
917	2021-02-02 09:02:26	2021-02-02 09:08:25	00:06:00.029000	1	1	1	1	5	Comunitat Valenciana	2	6	4	4	2	2	2	1	1	No	No	0	2	0	0	0	2	0	0	0	0	46	3	16	65	1	1	3	2	5	5	6	4	1	6	5	6	5	0	0
721	2021-02-01 14:22:13	2021-02-01 14:33:01	00:10:46.963000	2	2	2	1	5	Catalunya	1	4	4	4	4	1	1	3	2	No	Sí, por problemas de salud físicos	0	4	2	0	0	4	4	0	0	0	20	4	48	72	3	2	3	3	0	5	1	6	0	1	6	6	6	1	1
491	2021-01-31 09:36:38	2021-01-31 09:46:18	00:09:40.003000	1	2	1	1	5	Castilla y León	1	3	10	10	2	2	2	4	2	No	No	0	4	4	4	0	4	4	1	0	0	41	4	36	81	2	1	3	3	6	6	6	6	0	1	6	6	6	1	1
974	2021-02-02 18:04:47	2021-02-02 18:08:53	00:04:05.981000	1	2	4	1	5	Catalunya	2	8	2	2	4	2	2	1	1	No	No	1	0	0	0	0	0	0	0	0	0	0	0	0	0	1	3	3	1	#NULL!	#NULL!	#NULL!	#NULL!	#NULL!	#NULL!	#NULL!	#NULL!	#NULL!	#NULL!	#NULL!
1158	2021-02-07 20:10:07	2021-02-07 20:23:51	00:13:43.997000	2	2	3	1	5	Catalunya	2	7	4	4	4	1	1	1	1	No	No	0	0	0	0	0	1	1	1	2	2	14	4	41	59	3	3	3	2	3	4	1	6	1	0	3	1	6	1	1
580	2021-01-31 15:17:42	2021-01-31 15:26:14	00:08:32.957000	1	1	2	1	5	Catalunya	2	2	7	7	3	2	2	3	2	Sí, por primera vez en mi vida	Sí, por problemas de salud físicos	1	0	0	0	0	0	0	0	0	0	12	2	37	51	2	3	3	2	3	1	1	6	0	1	1	1	6	1	1
136	2021-01-30 10:00:12	2021-01-30 10:15:18	00:15:05.990000	1	2	3	1	5	Murcia	2	2	4	4	4	1	1	3	2	No	Sí, por confinamiento por contacto estrecho o sospecha de COVID-19	0	0	2	0	0	1	0	0	0	4	12	5	42	59	3	3	3	2	3	5	2	3	5	1	5	0	6	0	0
758	2021-02-01 16:34:49	2021-02-01 16:44:32	00:09:43.027000	2	2	2	1	5	Catalunya	2	14	11	14	1	1	1	1	1	No	No	0	0	0	0	1	0	0	0	0	0	36	8	40	84	2	1	2	3	4	6	6	6	0	0	5	6	6	1	1
1100	2021-02-04 01:26:39	2021-02-04 01:33:36	00:06:56.966000	1	2	1	1	5	Madrid	1	3	4	4	1	2	2	3	2	No	Sí, por confinamiento por contacto estrecho o sospecha de COVID-19	0	0	4	0	0	4	4	4	0	0	16	6	36	58	2	3	2	2	2	4	3	6	1	1	5	1	5	2	1
973	2021-02-02 17:51:41	2021-02-02 17:59:30	00:07:48.979000	1	2	1	1	5	Illes Balears	2	2	4	4	3	2	2	2	1	No	No	0	1	1	1	0	0	2	1	0	0	15	4	43	62	3	3	3	2	3	2	1	6	1	1	6	4	6	1	1
825	2021-02-01 20:52:07	2021-02-01 21:09:52	00:17:44.016000	1	2	2	1	5	Catalunya	2	2	1	14	3	2	2	2	1	No	Sí, por confinamiento por contacto estrecho o sospecha de COVID-19	0	0	0	0	2	0	0	0	0	0	15	4	31	50	2	3	3	2	1	5	1	1	1	1	1	3	2	1	1
270	2021-01-30 20:13:45	2021-01-30 20:19:57	00:06:12.038000	2	2	1	1	5	Catalunya	2	3	10	10	1	1	1	1	1	No	No	1	0	0	0	0	0	0	0	0	0	33	10	40	83	2	1	1	3	5	5	5	6	5	4	5	3	5	3	1
1154	2021-02-07 14:42:13	2021-02-07 15:08:06	00:25:52.003000	1	2	1	1	5	Catalunya	2	7	2	2	1	2	2	3	2	Sí, anteriormente estaba sin actividad laboral	Sí, por confinamiento por contacto estrecho o sospecha de COVID-19	1	0	0	0	0	0	0	0	0	0	32	3	31	66	2	1	3	2	6	6	4	4	0	0	3	2	6	3	0
926	2021-02-02 09:14:39	2021-02-02 09:55:37	00:40:57.994000	1	2	1	1	5	Comunitat Valenciana	1	3	4	4	1	2	2	2	1	No	Sí, por confinamiento por contacto estrecho o sospecha de COVID-19	0	2	2	0	2	0	2	1	0	0	41	5	34	80	2	1	3	3	4	5	2	6	0	5	6	5	5	0	1
1142	2021-02-06 13:52:10	2021-02-06 14:08:17	00:16:08.026000	1	2	2	1	5	Catalunya	1	6	2	2	3	1	1	3	2	No	Sí, por confinamiento por contacto estrecho o sospecha de COVID-19	0	0	1	0	0	3	3	0	0	0	36	5	34	75	2	1	3	3	6	6	5	6	0	0	0	5	6	3	1
443	2021-01-31 00:08:11	2021-01-31 00:13:35	00:05:22.963000	1	2	2	1	5	Madrid	1	3	10	10	2	2	2	1	1	No	Sí, por confinamiento por contacto estrecho o sospecha de COVID-19	1	0	0	0	0	0	0	0	0	0	54	9	31	94	2	1	2	3	6	6	6	6	3	6	6	6	6	3	3
459	2021-01-31 04:22:07	2021-01-31 04:28:53	00:06:45.994000	1	1	3	2	2		1	4	10	10	3	1	1	3	2	No	No	0	0	0	0	2	0	2	0	0	0	29	3	21	53	1	1	3	2	2	5	4	6	0	5	1	5	1	1	1
795	2021-02-01 19:59:00	2021-02-01 20:09:02	00:10:02.986000	1	1	2	1	5	Catalunya	2	8	13	14	4	2	2	2	1	No	Sí, por confinamiento por contacto estrecho o sospecha de COVID-19	0	0	0	0	0	0	0	1	0	0	6	8	43	57	3	3	2	2	1	3	1	6	0	0	2	1	6	2	6
1099	2021-02-04 01:13:56	2021-02-04 01:24:55	00:10:58.973000	2	2	2	1	5	Catalunya	1	4	4	4	3	1	1	4	2	No	Sí, por confinamiento por contacto estrecho o sospecha de COVID-19	0	0	0	0	0	2	0	1	0	0	10	2	48	60	3	3	3	2	1	1	1	6	0	1	6	1	6	0	0
1078	2021-02-03 19:40:25	2021-02-03 19:47:30	00:07:06.038000	1	2	2	1	5	Madrid	2	3	10	10	3	2	2	3	2	No	Sí, por confinamiento por contacto estrecho o sospecha de COVID-19	0	4	4	4	0	0	0	0	0	0	29	0	30	59	1	1	3	2	2	6	6	6	0	1	5	5	5	0	0
382	2021-01-30 22:31:34	2021-01-30 22:46:15	00:14:41.021000	1	2	4	1	5	Aragón	2	10	10	10	2	2	2	1	1	No	No	0	0	2	0	2	0	0	1	0	1	41	7	45	93	3	1	2	3	6	6	5	6	0	3	6	5	6	3	3
135	2021-01-30 10:09:16	2021-01-30 10:14:50	00:05:34.973000	1	2	2	1	5	Catalunya	1	10	13	14	2	1	1	1	1	No	No	1	0	0	0	0	0	0	0	0	0	31	9	39	79	2	1	2	3	5	6	0	6	3	2	6	4	6	0	0
839	2021-02-01 21:18:06	2021-02-01 21:24:19	00:06:12.989000	1	1	2	1	5	Catalunya	1	4	4	4	3	2	2	2	1	No	Sí, por confinamiento por contacto estrecho o sospecha de COVID-19	0	2	0	2	0	2	2	0	2	2	47	16	39	102	2	1	1	3	6	6	6	6	0	2	6	6	6	6	5
276	2021-01-30 20:23:42	2021-01-30 20:28:23	00:04:40.022000	1	2	1	1	5	Extremadura	1	4	10	10	1	1	1	2	1	No	No	0	2	0	1	0	2	0	1	0	0	34	9	40	83	2	1	2	3	4	5	5	6	0	1	6	3	6	6	3
1082	2021-02-03 20:59:11	2021-02-03 21:09:27	00:10:16.982000	1	2	1	1	5	Illes Balears	1	3	1	14	1	2	2	2	1	No	Sí, por confinamiento por contacto estrecho o sospecha de COVID-19	1	0	0	0	0	0	0	0	0	0	22	5	22	49	1	2	3	2	1	5	5	6	1	1	1	2	1	1	1
66	2021-01-29 18:07:53	2021-01-29 18:22:52	00:14:58.992000	1	1	4	1	5	Madrid	2	7	7	7	4	2	2	2	1	No	Sí, por problemas de salud físicos	0	0	1	1	0	1	0	0	0	0	16	5	27	48	1	3	3	2	3	3	3	6	1	1	1	1	6	1	1
244	2021-01-30 18:43:53	2021-01-30 18:48:53	00:05:01.018000	2	2	3	1	5	Catalunya	2	7	2	2	4	2	2	1	1	No	No	0	0	0	0	0	1	2	0	0	0	27	8	43	78	3	1	2	3	1	3	3	6	1	4	5	5	6	3	3
138	2021-01-30 10:19:41	2021-01-30 10:27:47	00:08:06	1	1	1	1	5	Catalunya	2	3	1	14	2	2	2	3	2	No	Sí, por confinamiento por contacto estrecho o sospecha de COVID-19	0	0	0	0	2	0	4	0	0	0	20	2	44	66	3	2	3	2	2	3	1	6	0	1	6	3	6	1	1
113	2021-01-29 23:01:38	2021-01-29 23:24:33	00:22:54.019000	2	1	1	1	6		1	4	4	4	2	1	1	1	1	No	No	1	0	0	0	0	0	0	0	0	0	41	19	46	106	3	1	1	3	2	6	5	6	4	4	6	6	6	6	5
1126	2021-02-04 17:41:40	2021-02-04 17:51:03	00:09:22.982000	2	2	3	1	5	Catalunya	2	3	7	7	4	2	2	1	1	No	No	1	0	0	0	0	0	0	0	0	0	39	4	35	78	2	1	3	3	5	6	4	6	0	1	5	6	6	1	1
805	2021-02-01 20:24:05	2021-02-01 20:34:02	00:09:57.024000	1	1	2	1	5	Catalunya	1	4	4	4	3	1	1	2	1	No	No	1	0	0	0	0	0	0	0	0	0	12	0	34	46	2	3	3	2	1	1	1	4	0	1	5	1	5	0	0
1119	2021-02-04 13:45:49	2021-02-04 13:53:18	00:07:29.021000	2	2	3	1	5	Catalunya	1	3	13	14	4	2	2	1	1	No	No	0	2	0	0	2	0	2	1	0	0	39	2	27	68	1	1	3	3	1	6	6	6	0	0	6	6	0	0	0
159	2021-01-30 11:27:46	2021-01-30 11:36:01	00:08:14.986000	1	2	4	1	5	Catalunya	2	3	7	7	4	2	2	3	2	No	Sí, por problemas de salud físicos	0	3	0	3	0	0	3	1	0	0	54	24	31	109	2	1	1	3	6	6	6	4	5	6	5	6	5	6	6
219	2021-01-30 16:27:14	2021-01-30 16:33:55	00:06:40.032000	1	2	2	1	5	Catalunya	2	3	10	10	4	2	2	1	1	No	Sí, por problemas de salud psíquicos	1	0	0	0	0	0	0	0	0	0	41	17	23	81	1	1	1	3	5	6	6	6	5	5	6	6	3	6	6
959	2021-02-02 14:38:32	2021-02-02 14:45:53	00:07:20.035000	1	2	1	1	5	Euskadi	1	4	4	4	1	1	1	3	2	Sí, anteriormente estaba sin actividad laboral	Sí, por problemas de salud físicos	0	4	0	4	1	0	4	1	0	0	30	8	27	65	1	1	2	2	4	4	3	6	1	5	6	2	5	2	2
184	2021-01-30 13:53:01	2021-01-30 14:00:29	00:07:27.034000	1	2	1	1	5	Catalunya	2	7	2	2	1	2	2	1	1	Sí, por primera vez en mi vida	Sí, por problemas de salud psíquicos	0	2	2	2	0	2	2	0	0	0	54	30	10	94	1	1	1	3	6	6	6	0	6	6	0	6	0	6	6
1028	2021-02-03 10:24:27	2021-02-03 10:35:18	00:10:51.974000	1	2	3	1	5	Catalunya	2	2	2	2	4	2	2	3	2	No	Sí, por confinamiento por contacto estrecho o sospecha de COVID-19	0	0	0	0	1	1	0	0	0	0	38	3	42	83	3	1	3	3	6	6	0	6	1	1	6	6	6	1	1
260	2021-01-30 19:29:19	2021-01-30 19:43:54	00:14:34.022000	1	2	4	1	5	Catalunya	1	17	4	4	4	1	1	1	1	No	No	0	0	2	2	2	2	2	1	2	0	52	22	37	111	2	1	1	3	5	6	6	4	4	5	6	6	6	6	6
311	2021-01-30 21:18:15	2021-01-30 21:32:55	00:14:39.984000	1	1	3	1	5	Catalunya	2	7	1	14	1	2	2	1	1	No	No	0	0	0	0	0	1	0	0	0	0	18	4	32	54	2	3	3	2	1	6	4	6	3	0	1	1	3	0	0
541	2021-01-31 12:39:39	2021-01-31 12:48:46	00:09:06.998000	1	2	4	1	5	Catalunya	2	2	2	2	4	2	2	1	1	No	No	1	0	0	0	0	0	0	0	0	0	52	10	20	82	1	1	1	3	6	6	6	6	0	6	5	6	2	5	5
368	2021-01-30 22:26:27	2021-01-30 22:31:09	00:04:40.973000	1	2	1	1	5	Madrid	2	3	10	10	2	1	1	3	2	No	No	0	2	0	0	0	0	0	0	0	0	19	11	45	75	3	3	1	3	2	4	2	6	0	2	6	2	5	6	5
121	2021-01-30 01:05:10	2021-01-30 01:12:01	00:06:49.968000	2	2	2	2	3		2	8	7	7	2	2	2	1	1	No	Sí, por problemas de salud físicos	0	2	2	0	2	2	2	0	0	0	48	15	26	89	1	1	1	3	4	6	6	4	5	6	5	6	5	5	0
821	2021-02-01 20:53:10	2021-02-01 21:01:07	00:07:57.965000	1	2	1	1	5	Catalunya	1	4	4	4	2	1	1	1	1	No	No	0	2	2	2	0	1	2	0	0	0	35	21	42	98	3	1	1	3	6	4	3	6	5	5	3	2	5	5	4
980	2021-02-02 19:04:27	2021-02-02 19:11:49	00:07:22.022000	1	2	3	1	5	Catalunya	1	4	7	7	4	2	2	1	1	No	No	0	0	0	0	0	0	1	0	0	0	46	11	15	72	1	1	1	3	4	5	5	3	3	5	3	6	3	3	4
246	2021-01-30 18:49:14	2021-01-30 18:55:20	00:06:05.990000	2	2	3	1	5	Catalunya	2	2	7	7	4	3	1	1	1	No	No	1	0	0	0	0	0	0	0	0	0	8	4	42	54	3	3	3	2	1	1	1	6	1	1	3	1	6	1	1
118	2021-01-30 00:07:05	2021-01-30 00:15:31	00:08:26.995000	2	1	5	1	5	Catalunya	2	3	7	7	4	3	1	1	1	No	No	0	0	0	0	1	0	0	0	0	0	2	1	35	38	2	3	3	2	1	0	1	6	0	0	6	0	6	0	0
1073	2021-02-03 18:32:34	2021-02-03 18:50:13	00:17:39.005000	1	2	3	1	5	Catalunya	2	3	2	2	3	2	2	3	2	No	No	0	4	0	0	0	0	4	4	4	0	7	3	39	49	2	3	3	2	1	4	2	6	0	0	4	0	6	1	1
1042	2021-02-03 13:44:30	2021-02-03 13:50:22	00:05:50.957000	1	2	1	1	5	Catalunya	1	3	1	14	1	2	2	1	1	No	No	0	0	0	0	2	0	0	0	0	0	43	21	40	104	2	1	1	3	0	6	6	6	4	6	6	6	6	6	6
1159	2021-02-07 20:13:13	2021-02-07 20:28:59	00:15:45.994000	1	2	3	1	5	Murcia	2	1	10	10	3	1	1	2	1	No	No	1	0	0	0	0	0	0	0	0	0	31	6	34	71	2	1	2	3	5	5	5	6	1	1	1	3	2	1	1
607	2021-01-31 20:20:44	2021-01-31 20:30:42	00:09:57.974000	1	2	2	1	5	Catalunya	2	7	4	4	2	1	1	4	2	No	Sí, por confinamiento por contacto estrecho o sospecha de COVID-19	0	2	2	1	1	2	2	1	2	2	47	20	35	102	2	1	1	3	5	6	5	4	5	5	6	6	5	4	5
828	2021-02-01 21:03:16	2021-02-01 21:12:34	00:09:17.971000	1	2	4	1	5	Catalunya	1	4	4	4	4	1	1	1	1	No	No	1	0	0	0	0	0	0	0	0	0	11	1	48	60	3	3	3	2	0	1	1	6	0	1	6	1	6	1	0
777	2021-02-01 18:19:16	2021-02-01 18:27:47	00:08:30.970000	1	2	3	1	5	Catalunya	1	4	4	4	1	1	1	1	1	No	No	0	2	0	0	0	0	0	0	0	0	41	16	41	98	3	1	1	3	2	6	3	6	0	6	6	5	6	4	3
449	2021-01-31 00:45:43	2021-01-31 00:51:28	00:05:43.958000	1	2	1	1	5	Andalucía	1	3	10	10	1	1	1	2	1	No	No	0	0	0	0	1	0	2	0	0	0	5	0	48	53	3	3	3	2	0	3	1	6	0	0	6	0	6	0	0
241	2021-01-30 18:13:47	2021-01-30 18:23:44	00:09:57.024000	2	2	3	1	5	Catalunya	1	4	7	7	4	3	1	1	1	No	No	1	0	0	0	0	0	0	0	0	0	12	6	35	53	2	3	2	2	1	5	1	1	1	1	2	1	6	3	1
87	2021-01-29 20:05:18	2021-01-29 20:16:23	00:11:05.971000	1	2	3	1	5	Catalunya	2	6	1	14	4	2	2	1	1	No	No	1	0	0	0	0	0	0	0	0	0	9	6	41	56	3	3	2	2	0	1	1	6	1	0	6	1	6	0	0
58	2021-01-29 17:07:49	2021-01-29 17:37:16	00:29:26.016000	1	2	3	1	5	Catalunya	2	5	3	14	4	2	2	1	1	No	No	1	0	0	0	0	0	0	0	0	0	11	2	48	61	3	3	3	2	1	3	1	6	0	1	6	1	6	1	1
508	2021-01-31 10:30:22	2021-01-31 10:40:02	00:09:40.003000	1	2	3	1	5	Catalunya	2	2	4	4	4	2	2	1	1	No	No	0	0	2	2	0	0	0	0	0	0	26	12	32	70	2	2	1	3	2	5	3	6	1	3	3	3	6	4	3
651	2021-02-01 10:36:23	2021-02-01 10:43:07	00:06:44.006000	1	1	2	1	5	Catalunya	2	2	7	7	3	2	2	3	2	Sí, anteriormente estaba sin actividad laboral	No	0	0	0	0	4	4	0	0	1	0	48	22	38	108	2	1	1	3	5	6	5	4	5	5	4	6	5	5	6
650	2021-02-01 10:26:34	2021-02-01 10:36:04	00:09:29.981000	1	1	2	1	5	Catalunya	2	2	7	7	2	2	2	3	2	Sí, anteriormente estaba sin actividad laboral	No	0	0	0	0	0	0	0	0	2	0	45	20	38	103	2	1	1	3	4	5	5	6	3	5	3	5	5	5	5
472	2021-01-31 09:02:38	2021-01-31 09:10:35	00:07:57.014000	1	2	2	1	5	Madrid	2	6	4	4	3	2	2	1	1	No	No	0	0	0	0	0	2	0	0	0	0	42	2	38	82	2	1	3	3	5	6	3	6	0	4	6	6	6	1	1
144	2021-01-30 10:35:29	2021-01-30 10:51:06	00:15:37.958000	2	2	4	1	5	Catalunya	1	3	1	14	4	2	2	1	1	No	No	1	0	0	0	0	0	0	0	0	0	30	13	45	88	3	1	1	3	0	6	6	6	0	0	6	6	6	5	3
202	2021-01-30 15:11:08	2021-01-30 15:19:58	00:08:49.027000	2	1	3	1	5	Catalunya	2	17	10	10	4	2	2	3	2	No	Sí, por problemas de salud físicos	0	4	0	4	0	4	4	0	0	0	30	7	42	79	3	1	2	3	1	5	5	6	1	3	4	5	6	3	2
1052	2021-02-03 14:55:49	2021-02-03 15:03:11	00:07:22.022000	1	2	1	1	5	Comunitat Valenciana	1	4	4	4	1	1	1	4	2	No	No	0	0	1	0	0	0	0	1	0	0	15	6	37	58	2	3	2	2	1	4	2	0	0	2	1	2	6	3	3
1128	2021-02-04 18:57:30	2021-02-04 19:07:10	00:09:40.003000	1	2	4	1	5	Catalunya	2	3	7	7	4	2	2	2	1	No	Sí, por confinamiento por contacto estrecho o sospecha de COVID-19	0	2	0	0	2	2	2	0	2	0	27	13	37	77	2	1	1	3	1	5	3	6	3	0	6	4	6	3	3
420	2021-01-30 23:08:15	2021-01-30 23:23:44	00:15:28.022000	1	2	2	1	5	Comunitat Valenciana	2	3	10	10	1	1	1	2	1	No	Sí, por confinamiento por contacto estrecho o sospecha de COVID-19	1	0	0	0	0	0	0	0	0	0	43	10	41	94	3	1	1	3	5	5	5	4	0	6	5	6	5	4	6
548	2021-01-31 13:10:01	2021-01-31 13:17:15	00:07:13.987000	2	1	2	1	5	Catalunya	1	10	10	10	3	2	2	1	1	No	No	1	0	0	0	0	0	0	0	0	0	11	5	21	37	1	3	3	2	1	1	1	2	1	1	1	1	5	1	1
605	2021-01-31 19:04:35	2021-01-31 20:21:16	01:16:40.022000	1	2	1	1	5	Catalunya	2	6	4	4	2	2	2	1	1	No	No	0	0	0	0	1	0	0	0	0	2	13	0	42	55	3	3	3	2	0	4	3	6	0	0	0	0	6	0	0
724	2021-02-01 14:39:52	2021-02-01 14:45:30	00:05:39.034000	2	2	1	1	5	Catalunya	2	2	7	7	1	2	2	1	1	No	No	0	0	0	0	0	0	0	1	0	0	35	23	31	89	2	1	1	3	4	4	5	6	4	0	4	6	4	6	6
257	2021-01-30 19:16:16	2021-01-30 19:22:18	00:06:02.966000	2	2	2	1	5	Catalunya	2	2	2	2	4	2	2	2	1	No	Sí, por confinamiento por contacto estrecho o sospecha de COVID-19	0	1	0	0	2	1	2	0	1	0	51	9	30	90	1	1	2	3	6	6	6	6	0	5	6	6	5	5	0
619	2021-01-31 21:41:22	2021-01-31 21:51:33	00:10:09.984000	1	2	1	1	5	Murcia	1	3	10	10	1	2	2	2	1	Sí, anteriormente estaba sin actividad laboral	Sí, por confinamiento por contacto estrecho o sospecha de COVID-19	0	2	0	2	0	1	2	1	0	2	11	4	43	58	3	3	3	2	2	4	1	6	0	0	2	1	6	1	1
658	2021-02-01 11:28:57	2021-02-01 11:51:31	00:22:33.974000	1	1	1	1	5	Navarra	2	4	4	4	1	1	1	1	1	Sí, por primera vez en mi vida	No	1	0	0	0	0	0	0	0	0	0	25	14	42	81	3	2	1	3	2	4	3	4	3	6	6	4	5	6	3
437	2021-01-30 23:45:30	2021-01-30 23:55:21	00:09:50.976000	2	2	1	1	5	Comunitat Valenciana	1	4	10	10	3	1	1	3	2	No	Sí, por confinamiento por contacto estrecho o sospecha de COVID-19	0	3	3	3	3	3	3	0	3	0	18	2	46	66	3	3	3	2	0	6	5	6	0	0	6	3	6	1	1
572	2021-01-31 14:32:42	2021-01-31 14:40:10	00:07:27.034000	1	2	2	1	5	Catalunya	2	6	4	4	2	2	2	3	2	No	Sí, por problemas de salud físicos	0	4	2	0	4	0	4	0	0	0	25	4	42	71	3	2	3	3	2	5	4	6	0	2	6	4	6	3	1
716	2021-02-01 13:54:12	2021-02-01 14:30:52	00:36:41.040000	1	2	1	1	5	Castilla y León	1	3	4	4	1	1	1	2	1	No	Sí, por confinamiento por contacto estrecho o sospecha de COVID-19	0	2	0	0	0	0	0	0	0	0	42	0	25	67	1	1	3	3	5	6	6	6	0	2	1	5	5	0	0
545	2021-01-31 12:54:34	2021-01-31 13:03:41	00:09:05.962000	2	2	2	1	5	Illes Balears	2	6	10	10	3	1	1	1	1	No	No	0	0	0	0	0	0	0	1	0	0	25	2	27	54	1	2	3	2	4	5	3	3	0	0	6	4	6	0	2
549	2021-01-31 13:07:40	2021-01-31 13:19:31	00:11:50.986000	1	2	2	1	5	Catalunya	1	3	10	10	3	2	2	3	2	No	Sí, por problemas de salud físicos	1	0	0	0	0	0	0	0	0	0	25	9	38	72	2	2	2	3	3	3	3	6	1	3	4	1	5	2	3
1140	2021-02-06 13:10:57	2021-02-06 13:25:21	00:14:25.037000	1	2	2	1	5	Catalunya	2	6	2	2	3	2	2	3	2	No	Sí, por problemas de salud físicos	0	0	0	0	0	0	2	0	0	0	16	9	37	62	2	3	2	2	1	3	3	6	0	0	6	3	3	3	3
451	2021-01-31 00:59:44	2021-01-31 01:08:51	00:09:06.998000	1	2	1	1	5	Madrid	1	3	10	10	1	2	2	3	2	Sí, anteriormente estaba sin actividad laboral	Sí, por confinamiento por contacto estrecho o sospecha de COVID-19	0	2	2	0	0	2	4	0	0	0	30	10	37	77	2	1	1	3	4	4	5	6	2	4	6	3	6	5	3
363	2021-01-30 22:21:22	2021-01-30 22:26:43	00:05:20.026000	1	2	2	1	5	Comunitat Valenciana	2	3	10	10	1	1	1	3	2	No	Sí, por confinamiento por contacto estrecho o sospecha de COVID-19	0	2	0	0	1	0	2	0	0	0	41	8	44	93	3	1	2	3	3	6	5	6	0	5	4	6	6	4	4
455	2021-01-31 01:47:46	2021-01-31 01:58:28	00:10:42.038000	1	2	1	1	5	Madrid	1	15	10	10	1	1	1	1	1	No	No	0	0	0	0	0	2	2	0	0	0	33	7	40	80	2	1	2	3	1	5	4	6	0	4	5	3	5	3	2
288	2021-01-30 20:48:33	2021-01-30 20:56:27	00:07:53.040000	1	2	1	1	5	Galicia	1	3	10	10	1	1	1	1	1	No	No	0	2	0	0	1	2	2	0	0	0	43	15	37	95	2	1	1	3	4	5	5	6	3	4	6	5	4	4	4
52	2021-01-29 17:05:06	2021-01-29 17:12:52	00:07:46.992000	1	2	3	1	5	Catalunya	1	4	7	7	3	1	1	4	2	No	Sí, por confinamiento por contacto estrecho o sospecha de COVID-19	1	0	0	0	0	0	0	0	0	0	31	0	46	77	3	1	3	3	0	5	5	6	0	4	6	5	6	0	0
442	2021-01-30 23:56:04	2021-01-31 00:07:01	00:10:56.035000	1	1	4	1	5	Catalunya	1	4	4	4	1	1	1	1	1	No	No	1	0	0	0	0	0	0	0	0	0	0	0	43	43	3	3	3	2	0	0	0	6	0	0	6	0	6	0	0
39	2021-01-29 16:29:12	2021-01-29 16:34:54	00:05:41.021000	2	2	3	1	5	Catalunya	1	16	4	4	4	1	1	1	1	No	No	0	0	0	0	2	0	2	0	0	0	9	8	36	53	2	3	2	2	1	1	2	1	0	1	6	0	6	1	1
846	2021-02-01 21:28:37	2021-02-01 21:38:43	00:10:06.010000	2	2	2	1	5	Catalunya	1	4	9	14	2	1	1	1	1	No	No	0	2	0	0	0	0	0	1	0	0	10	6	35	51	2	3	2	2	1	1	2	6	0	1	1	1	6	4	1
591	2021-01-31 17:45:32	2021-01-31 17:53:54	00:08:21.034000	1	2	2	1	5	Castilla y León	2	3	10	10	3	2	2	3	2	No	Sí, por problemas de salud psíquicos	0	2	4	0	4	2	2	0	0	0	54	13	35	102	2	1	1	3	6	6	6	6	1	6	6	6	5	6	6
62	2021-01-29 17:40:43	2021-01-29 17:53:26	00:12:42.998000	1	2	3	1	5	Catalunya	2	6	2	2	4	1	1	1	1	No	No	0	0	0	0	1	0	0	1	0	0	17	2	32	51	2	3	3	2	1	6	5	6	0	1	1	1	6	1	1
421	2021-01-30 23:15:29	2021-01-30 23:24:34	00:09:03.974000	1	2	1	1	5	Comunitat Valenciana	1	2	10	10	1	1	1	3	2	Sí, anteriormente estaba sin actividad laboral	Sí, por problemas de salud físicos	0	3	3	3	0	3	3	0	0	1	17	1	44	62	3	3	3	2	3	3	1	6	0	0	6	3	6	1	0
882	2021-02-01 22:48:45	2021-02-01 22:54:37	00:05:51.043000	1	1	1	2	3		2	3	1	14	1	2	2	1	1	Sí, por primera vez en mi vida	No	1	0	0	0	0	0	0	0	0	0	15	14	48	77	3	3	1	3	1	6	1	6	0	4	6	1	6	3	6
546	2021-01-31 12:58:49	2021-01-31 13:03:57	00:05:08.016000	2	2	2	1	5	Catalunya	1	17	9	14	4	1	1	1	1	No	No	1	0	0	0	0	0	0	0	0	0	44	23	43	110	3	1	1	3	6	5	5	6	5	5	5	5	6	5	5
364	2021-01-30 22:06:27	2021-01-30 22:28:43	00:22:16.003000	2	2	4	2	11		1	2	10	10	4	1	1	2	1	No	Sí, por confinamiento por contacto estrecho o sospecha de COVID-19	0	0	2	0	0	0	0	0	0	0	16	8	40	64	2	3	2	2	1	2	5	3	0	1	1	3	6	1	0
164	2021-01-30 11:46:45	2021-01-30 11:58:59	00:12:13.968000	1	2	4	1	5	Catalunya	2	2	2	2	4	2	2	2	1	No	Sí, por confinamiento por contacto estrecho o sospecha de COVID-19	1	0	0	0	0	0	0	0	0	0	39	14	20	73	1	1	1	3	5	4	5	4	5	5	5	4	3	3	3
631	2021-02-01 06:47:36	2021-02-01 06:52:12	00:04:35.011000	1	1	3	1	5	Catalunya	2	17	13	14	4	1	1	1	1	No	No	1	0	0	0	0	0	0	0	0	0	30	18	24	72	1	1	1	3	5	3	3	3	4	3	3	3	3	4	4
807	2021-02-01 20:28:03	2021-02-01 20:36:30	00:08:26.995000	1	1	4	1	5	Catalunya	2	17	1	14	4	2	2	3	2	No	Sí, por problemas de salud físicos	0	2	0	0	0	0	0	0	0	0	0	0	0	0	1	3	3	1	#NULL!	#NULL!	#NULL!	#NULL!	#NULL!	#NULL!	#NULL!	#NULL!	#NULL!	#NULL!	#NULL!
835	2021-02-01 21:11:40	2021-02-01 21:20:57	00:09:17.971000	1	1	4	1	5	Catalunya	2	2	7	7	4	2	2	3	2	No	No	1	0	0	0	0	0	0	0	0	0	20	11	45	76	3	2	1	3	0	3	2	6	6	3	6	3	6	3	1
1014	2021-02-03 00:31:10	2021-02-03 00:41:04	00:09:52.963000	2	1	5	1	5	Catalunya	1	4	7	7	4	1	1	1	1	No	No	1	0	0	0	0	0	0	0	0	0	28	10	23	61	1	1	1	2	1	2	6	4	3	5	6	2	4	2	2
359	2021-01-30 22:16:07	2021-01-30 22:23:22	00:07:15.024000	1	2	1	1	5	Comunitat Valenciana	1	3	10	10	1	1	1	1	1	No	No	1	0	0	0	0	0	0	0	0	0	19	1	26	46	1	3	3	2	3	3	4	6	0	0	1	2	2	1	0
333	2021-01-30 22:03:03	2021-01-30 22:07:12	00:04:10.042000	1	2	2	1	5	Madrid	2	6	10	10	3	2	2	1	1	No	No	1	0	0	0	0	0	0	0	0	0	0	4	36	40	2	3	3	2	0	0	0	0	0	0	0	0	6	3	1
624	2021-01-31 22:19:43	2021-01-31 22:26:11	00:06:26.986000	1	2	1	1	5	Madrid	1	4	10	10	1	1	1	4	2	Sí, anteriormente estaba sin actividad laboral	No	0	2	4	2	0	2	4	0	0	0	22	12	21	55	1	2	1	2	3	5	5	3	0	1	3	1	5	5	3
204	2021-01-30 15:17:25	2021-01-30 15:21:06	00:03:41.962000	1	1	2	1	5	Catalunya	2	8	10	10	3	1	1	1	1	No	No	1	0	0	0	0	0	0	0	0	0	54	18	0	72	1	1	1	3	6	6	6	0	6	6	0	6	0	0	0
90	2021-01-29 20:20:51	2021-01-29 20:27:06	00:06:14.976000	1	1	4	1	5	Catalunya	2	6	7	7	4	2	2	1	1	No	No	1	0	0	0	0	0	0	0	0	0	11	12	47	70	3	3	1	3	1	1	1	6	0	0	6	1	6	4	4
901	2021-02-02 00:29:07	2021-02-02 00:36:59	00:07:52.003000	1	1	1	1	5	Catalunya	1	4	4	4	1	1	1	1	1	No	No	0	0	2	2	0	0	2	1	2	0	35	22	38	95	2	1	1	3	4	3	4	6	2	5	6	5	5	6	5
1051	2021-02-03 14:50:28	2021-02-03 14:57:31	00:07:03.014000	2	1	5	1	5	Catalunya	1	4	7	7	4	1	1	1	1	No	No	0	0	0	0	0	0	0	1	0	0	7	1	45	53	3	3	3	2	0	3	2	6	0	0	3	0	6	0	0
560	2021-01-31 13:37:41	2021-01-31 13:47:19	00:09:38.966000	2	2	3	1	5	Catalunya	1	3	13	14	4	2	2	4	2	No	Sí, por problemas de salud físicos	0	0	0	0	4	0	4	4	0	0	15	3	41	59	3	3	3	2	0	4	0	6	0	1	1	2	6	1	1
413	2021-01-30 23:07:35	2021-01-30 23:15:48	00:08:14.035000	1	2	2	1	5	Illes Balears	2	3	10	10	3	1	1	1	1	No	No	1	0	0	0	0	0	0	0	0	0	41	4	36	81	2	1	3	3	4	6	5	6	0	4	4	4	4	1	2
9	2021-01-29 14:13:18	2021-01-29 14:18:53	00:05:34.973000	1	1	1	1	12		1	4	4	4	3	2	2	1	1	No	No	1	0	0	0	0	0	0	0	0	0	11	0	47	58	3	3	3	2	0	4	2	6	0	0	6	0	6	0	0
28	2021-01-29 15:31:19	2021-01-29 15:39:08	00:07:48.979000	2	2	1	1	6		1	3	4	4	2	2	2	3	2	No	Sí, por problemas de salud psíquicos	0	4	0	4	0	0	0	4	0	0	40	17	33	90	2	1	1	3	4	5	4	6	5	5	4	5	6	3	4
120	2021-01-30 01:06:02	2021-01-30 01:11:09	00:05:06.979000	1	1	3	2	3		2	6	7	7	4	2	2	1	1	No	No	0	0	0	0	2	0	2	0	2	0	47	15	23	85	1	1	1	3	2	6	6	6	1	6	5	6	5	4	3
122	2021-01-30 01:08:48	2021-01-30 01:13:37	00:04:47.971000	2	2	1	2	3		2	2	7	7	1	2	2	1	1	No	Sí, por problemas de salud físicos	0	2	0	0	2	2	1	0	1	0	43	9	38	90	2	1	2	3	2	6	6	6	1	6	3	5	6	3	3
123	2021-01-30 01:28:45	2021-01-30 01:33:13	00:04:28.963000	1	2	2	2	3		2	6	7	7	3	1	1	1	1	No	No	0	2	0	0	0	0	0	0	0	0	51	24	15	90	1	1	1	3	4	6	6	3	5	6	2	6	1	5	6
124	2021-01-30 02:12:51	2021-01-30 02:21:11	00:08:19.997000	2	2	1	2	3		1	4	7	7	1	1	1	2	1	No	No	0	0	0	0	0	1	1	1	0	0	25	3	47	75	3	2	3	3	1	6	3	6	3	2	6	3	6	0	0
125	2021-01-30 03:56:15	2021-01-30 04:03:24	00:07:08.026000	1	2	2	2	3		2	8	7	7	3	2	2	2	1	No	Sí, por confinamiento por contacto estrecho o sospecha de COVID-19	0	0	1	0	0	2	2	0	0	0	33	14	27	74	1	1	1	3	3	4	4	6	3	3	1	4	3	3	4
200	2021-01-30 15:13:30	2021-01-30 15:18:22	00:04:52.032000	2	2	2	2	3		2	7	7	7	3	2	2	1	1	No	No	0	0	0	0	2	2	2	0	0	0	30	16	33	79	2	1	1	3	3	3	4	4	3	3	3	5	6	5	5
212	2021-01-30 15:54:22	2021-01-30 16:01:43	00:07:20.986000	2	2	1	1	1		1	4	4	4	1	1	1	3	2	No	Sí, por confinamiento por contacto estrecho o sospecha de COVID-19	0	2	0	0	1	1	0	1	0	0	21	7	43	71	3	2	2	3	2	4	3	6	0	2	5	1	6	3	0
321	2021-01-30 21:41:53	2021-01-30 21:49:31	00:07:36.970000	2	2	2	2	2		2	6	10	10	2	1	1	1	1	No	No	0	2	0	0	0	1	0	1	2	0	29	12	29	70	1	1	1	3	3	4	4	4	1	2	3	4	3	5	5
326	2021-01-30 21:53:02	2021-01-30 21:59:25	00:06:23.011000	1	2	1	2	3		2	6	7	7	2	2	2	1	1	No	No	0	0	0	0	0	2	2	0	0	1	11	6	31	48	2	3	2	2	2	1	2	6	1	0	1	2	6	2	2
354	2021-01-30 22:11:21	2021-01-30 22:18:28	00:07:06.989000	1	2	1	2	9		1	4	10	10	1	1	1	1	1	No	No	1	0	0	0	0	0	0	0	0	0	34	9	22	65	1	1	2	2	3	5	5	4	2	3	2	5	3	2	1
419	2021-01-30 23:16:00	2021-01-30 23:22:52	00:06:51.005000	2	2	1	2	2		1	4	10	10	1	1	1	1	1	Sí, por primera vez en mi vida	No	0	0	0	0	0	0	2	1	0	0	43	8	20	71	1	1	2	3	6	4	6	3	3	3	1	5	2	2	0
453	2021-01-31 01:13:04	2021-01-31 01:19:57	00:06:54.029000	2	2	1	2	3		1	4	10	10	1	1	1	3	2	No	Sí, por confinamiento por contacto estrecho o sospecha de COVID-19	0	0	0	1	0	2	0	0	4	0	22	1	38	61	2	2	3	2	0	6	2	6	0	0	5	4	5	1	0
474	2021-01-31 09:07:31	2021-01-31 09:12:46	00:05:15.014000	1	1	1	1	10		2	7	10	10	2	2	2	3	2	No	Sí, por confinamiento por contacto estrecho o sospecha de COVID-19	1	0	0	0	0	0	0	0	0	0	22	6	39	67	2	2	2	3	3	6	3	6	0	0	6	1	6	3	3
564	2021-01-31 13:56:46	2021-01-31 14:01:23	00:04:36.998000	2	2	1	2	4		2	3	10	10	1	2	2	1	1	Sí, por primera vez en mi vida	No	0	2	2	0	2	2	0	1	2	0	26	4	40	70	2	2	3	3	2	6	2	6	0	1	4	3	6	2	2
597	2021-01-31 18:34:29	2021-01-31 18:44:46	00:10:16.982000	2	2	1	2	2		1	3	10	10	2	1	1	1	1	No	No	0	2	0	0	0	2	2	0	0	0	35	1	41	77	3	1	3	3	5	5	5	6	0	2	6	5	6	1	0
598	2021-01-31 18:45:57	2021-01-31 19:02:47	00:16:50.966000	2	2	2	2	4		1	6	10	10	3	1	1	1	1	No	Sí, por confinamiento por contacto estrecho o sospecha de COVID-19	0	0	0	2	0	2	2	1	2	0	28	5	33	66	2	1	3	2	2	4	4	6	0	1	1	3	5	2	2
707	2021-02-01 14:06:19	2021-02-01 14:11:15	00:04:56.957000	1	2	2	2	3		1	2	7	7	3	1	1	1	1	No	Sí, por confinamiento por contacto estrecho o sospecha de COVID-19	0	0	0	0	2	2	2	1	2	0	38	9	27	74	1	1	2	3	4	5	5	6	1	5	4	4	4	2	1
712	2021-02-01 14:15:45	2021-02-01 14:21:56	00:06:11.002000	2	1	1	1	6		2	6	4	4	3	2	2	1	1	No	No	1	0	0	0	0	0	0	0	0	0	19	17	30	66	1	3	1	2	3	3	2	6	5	4	1	1	5	5	3
731	2021-02-01 15:04:43	2021-02-01 15:10:46	00:06:02.016000	1	2	1	2	3		1	7	4	4	1	2	2	3	2	No	Sí, por confinamiento por contacto estrecho o sospecha de COVID-19	0	4	2	0	1	2	4	1	0	0	18	4	37	59	2	3	3	2	2	3	3	6	0	1	6	2	6	2	1
736	2021-02-01 15:12:08	2021-02-01 15:20:54	00:08:47.040000	1	1	1	1	12		1	1	4	4	1	1	1	3	2	No	Sí, por confinamiento por contacto estrecho o sospecha de COVID-19	1	0	0	0	0	0	0	0	0	0	14	9	32	55	2	3	2	2	1	3	1	6	0	1	1	1	6	3	3
738	2021-02-01 15:15:23	2021-02-01 15:23:32	00:08:09.024000	2	1	1	2	7		1	1	4	4	1	2	2	3	2	No	Sí, por confinamiento por contacto estrecho o sospecha de COVID-19	0	0	3	0	0	0	3	3	0	0	12	12	38	62	2	3	1	2	5	1	0	6	1	0	4	0	6	5	6
755	2021-02-01 15:38:45	2021-02-01 16:33:48	00:55:04.022000	2	2	1	2	3		2	2	7	7	1	2	2	1	1	No	No	1	0	0	0	0	0	0	0	0	0	33	16	23	72	1	1	1	3	3	5	3	4	4	4	3	3	3	4	3
761	2021-02-01 16:48:55	2021-02-01 16:59:15	00:10:20.957000	1	2	3	2	3		2	6	7	7	4	2	2	1	1	No	No	0	0	0	0	0	0	2	0	0	0	33	9	35	77	2	1	2	3	1	6	5	6	1	4	5	5	6	5	3
774	2021-02-01 17:55:47	2021-02-01 18:06:40	00:10:53.962000	2	2	1	2	7		1	6	4	4	1	1	1	2	1	Sí, por primera vez en mi vida	Sí, por confinamiento por contacto estrecho o sospecha de COVID-19	0	2	0	0	0	1	1	0	0	0	15	6	40	61	2	3	2	2	0	4	1	4	1	3	4	4	6	2	2
780	2021-02-01 18:38:50	2021-02-01 18:43:27	00:04:35.962000	1	2	2	2	3		2	8	13	14	3	2	2	1	1	No	No	0	1	2	2	2	2	0	1	1	0	53	7	29	89	1	1	2	3	6	6	6	4	0	6	6	6	6	0	0
928	2021-02-02 09:57:34	2021-02-02 10:01:34	00:04:00.019000	1	2	1	2	9		2	6	4	4	1	1	1	2	1	Sí, por primera vez en mi vida	No	0	0	1	0	1	1	0	0	0	0	37	18	27	82	1	1	1	3	3	6	4	4	5	5	4	6	4	5	6
979	2021-02-02 18:58:45	2021-02-02 19:05:05	00:06:19.037000	2	2	1	2	2		1	4	4	4	1	1	1	1	1	No	No	0	2	0	0	0	2	0	0	0	0	41	7	35	83	2	1	2	3	3	6	4	6	1	4	6	6	5	1	1
984	2021-02-02 19:17:04	2021-02-02 19:24:06	00:07:03.014000	1	1	4	2	2		1	7	7	7	4	2	2	1	1	No	No	0	2	2	0	0	2	0	0	0	0	49	18	20	87	1	1	1	3	5	6	6	4	5	6	3	6	5	1	1
987	2021-02-02 19:24:23	2021-02-02 19:29:00	00:04:35.962000	2	2	1	2	3		1	2	7	7	1	2	2	2	1	No	Sí, por confinamiento por contacto estrecho o sospecha de COVID-19	1	0	0	0	0	0	0	0	0	0	43	24	41	108	3	1	1	3	4	5	4	4	5	6	6	6	6	5	5
1035	2021-02-03 11:44:01	2021-02-03 11:48:52	00:04:50.995000	1	2	1	1	1		2	3	1	14	2	2	2	1	1	Sí, anteriormente estaba sin actividad laboral	No	0	2	2	0	0	0	2	0	0	0	31	20	33	84	2	1	1	3	3	6	4	4	5	1	5	5	6	6	6
1046	2021-02-03 14:16:16	2021-02-03 14:25:06	00:08:49.027000	1	2	1	2	8		2	2	4	4	2	1	1	1	1	No	No	0	0	0	0	0	1	0	0	0	0	8	2	42	52	3	3	3	2	0	1	1	6	0	1	1	1	6	1	1
1117	2021-02-04 12:46:11	2021-02-04 13:47:00	01:00:49.018000	1	2	1	2	3		2	2	4	4	1	1	1	1	1	Sí, anteriormente estaba sin actividad laboral	No	1	0	0	0	0	0	0	0	0	0	39	24	31	94	2	1	1	3	3	4	3	4	6	5	5	5	0	4	4
1138	2021-02-06 11:42:06	2021-02-06 11:50:56	00:08:49.978000	2	2	1	1	6		2	6	4	4	1	2	2	3	2	No	Sí, por confinamiento por contacto estrecho o sospecha de COVID-19	0	4	4	0	0	0	4	0	0	0	25	5	46	76	3	2	3	3	4	6	3	6	1	0	5	4	6	0	4
733	2021-02-01 15:10:11	2021-02-01 15:15:31	00:05:20.026000	1	1	1	1	5	Andalucía	1	4	4	4	2	1	1	1	1	No	No	1	0	0	0	0	0	0	0	0	0	11	1	48	60	3	3	3	2	1	1	1	6	0	1	6	1	6	0	1
971	2021-02-02 17:15:55	2021-02-02 17:40:17	00:24:21.974000	1	1	1	1	5	Andalucía	1	4	4	4	1	1	1	1	1	No	No	0	0	0	0	0	0	2	0	0	0	19	8	34	61	2	3	2	2	1	4	1	1	2	1	1	2	6	2	2
1045	2021-02-03 14:19:47	2021-02-03 14:23:09	00:03:22.003000	1	2	1	1	5	Andalucía	1	4	4	4	1	1	1	2	1	Sí, por primera vez en mi vida	No	0	0	2	0	2	0	0	1	0	2	45	17	45	107	3	1	1	3	3	6	5	6	6	4	6	6	6	3	2
96	2021-01-29 21:02:59	2021-01-29 21:08:11	00:05:13.027000	1	1	3	1	5	Andalucía	2	7	7	7	4	2	2	1	1	No	No	1	0	0	0	0	0	0	0	0	0	42	13	26	81	1	1	1	3	5	4	6	6	4	4	3	6	4	4	2
108	2021-01-29 22:00:09	2021-01-29 22:06:44	00:06:33.984000	1	2	2	1	5	Andalucía	2	2	2	2	3	2	2	2	1	No	Sí, por confinamiento por contacto estrecho o sospecha de COVID-19	0	0	0	0	0	0	1	0	0	0	51	19	39	109	2	1	1	3	5	6	6	6	5	6	6	6	6	4	5
116	2021-01-29 23:46:00	2021-01-29 23:53:03	00:07:03.965000	1	2	1	1	5	Andalucía	2	3	9	14	1	1	1	1	1	No	No	0	0	0	0	0	0	2	0	0	0	20	4	29	53	1	2	3	2	3	4	3	6	0	0	3	3	6	2	0
237	2021-01-30 18:13:10	2021-01-30 18:17:42	00:04:31.987000	1	2	1	1	5	Andalucía	2	2	4	4	3	1	1	1	1	No	No	0	0	0	0	0	1	0	0	0	0	9	3	48	60	3	3	3	2	1	3	1	6	0	0	6	1	6	1	1
284	2021-01-30 20:28:36	2021-01-30 20:34:37	00:06:00.979000	1	2	1	1	5	Andalucía	1	4	10	10	2	1	1	4	2	Sí, anteriormente estaba sin actividad laboral	No	0	0	2	0	2	0	2	0	0	0	34	11	34	79	2	1	1	3	2	6	5	4	2	2	4	4	6	3	3
286	2021-01-30 20:30:00	2021-01-30 20:35:21	00:05:20.976000	1	2	1	1	5	Andalucía	1	3	10	10	2	1	1	1	1	No	No	1	0	0	0	0	0	0	0	0	0	12	1	44	57	3	3	3	2	1	4	1	6	0	2	5	0	6	1	0
289	2021-01-30 20:54:06	2021-01-30 20:59:07	00:05:01.968000	1	2	1	1	5	Andalucía	2	3	10	10	2	1	1	2	1	No	Sí, por confinamiento por contacto estrecho o sospecha de COVID-19	0	0	0	0	0	1	1	0	0	0	39	7	29	75	1	1	2	3	4	4	3	4	2	6	6	5	5	3	2
339	2021-01-30 22:03:10	2021-01-30 22:09:28	00:06:16.963000	1	2	2	1	5	Andalucía	1	3	10	10	3	2	2	1	1	Sí, anteriormente estaba sin actividad laboral	No	0	0	0	0	0	1	0	0	0	0	29	7	26	62	1	1	2	2	3	5	5	6	1	3	3	3	3	2	3
341	2021-01-30 22:04:21	2021-01-30 22:09:38	00:05:17.002000	1	2	1	1	5	Andalucía	2	6	10	10	1	1	1	2	1	Sí, anteriormente estaba sin actividad laboral	Sí, por problemas de salud psíquicos	0	0	0	0	2	2	2	0	0	0	18	5	13	36	1	3	3	2	3	2	2	1	0	3	3	1	2	2	2
357	2021-01-30 22:19:27	2021-01-30 22:23:12	00:03:46.022000	1	2	1	1	5	Andalucía	1	4	10	10	1	1	1	2	1	No	Sí, por confinamiento por contacto estrecho o sospecha de COVID-19	0	2	0	2	0	2	2	0	0	0	16	4	38	58	2	3	3	2	0	4	3	6	3	1	3	0	5	0	0
373	2021-01-30 22:24:51	2021-01-30 22:35:11	00:10:20.957000	1	2	1	1	5	Andalucía	2	3	10	10	3	2	2	1	1	No	No	0	0	0	0	0	0	2	0	2	0	17	6	41	64	3	3	2	2	1	1	1	6	0	3	6	2	6	3	2
415	2021-01-30 22:17:58	2021-01-30 23:18:23	01:00:26.035000	1	1	1	1	5	Andalucía	1	3	10	10	1	1	1	1	1	No	No	1	0	0	0	0	0	0	0	0	0	40	18	30	88	1	1	1	3	6	5	4	4	0	4	3	6	5	5	4
432	2021-01-30 23:43:25	2021-01-30 23:49:46	00:06:21.974000	1	2	1	1	5	Andalucía	1	3	10	10	1	2	2	3	2	No	Sí, por confinamiento por contacto estrecho o sospecha de COVID-19	1	0	0	0	0	0	0	0	0	0	21	5	32	58	2	2	3	2	2	5	3	6	0	1	2	1	2	3	2
438	2021-01-30 23:50:58	2021-01-30 23:56:30	00:05:32.986000	1	2	1	1	5	Andalucía	1	3	10	10	2	2	2	3	2	No	Sí, por confinamiento por contacto estrecho o sospecha de COVID-19	0	0	0	0	0	0	4	0	4	0	25	5	38	68	2	2	3	3	2	5	4	6	0	2	4	2	5	2	2
463	2021-01-31 08:37:17	2021-01-31 08:44:07	00:06:49.018000	1	2	2	1	5	Andalucía	2	6	10	10	3	2	2	1	1	No	No	0	0	2	0	0	1	2	1	0	0	26	8	29	63	1	2	2	2	3	4	2	3	0	3	3	3	6	3	3
481	2021-01-31 09:15:09	2021-01-31 09:22:10	00:07:01.978000	1	1	1	1	5	Andalucía	1	3	10	10	1	2	2	3	2	No	Sí, por problemas de salud físicos	0	0	0	0	0	0	3	0	0	0	34	3	40	77	2	1	3	3	4	6	6	6	0	1	4	2	6	1	2
500	2021-01-31 10:06:23	2021-01-31 10:11:35	00:05:11.990000	1	2	2	1	5	Andalucía	2	4	10	10	3	1	1	2	1	No	Sí, por confinamiento por contacto estrecho o sospecha de COVID-19	0	0	0	0	0	2	2	0	0	0	18	11	18	47	1	3	1	2	3	3	1	1	1	1	3	1	1	4	3
512	2021-01-31 10:43:09	2021-01-31 10:50:29	00:07:20.986000	1	2	2	1	5	Andalucía	2	3	10	10	2	2	2	3	2	No	Sí, por problemas de salud físicos	0	4	4	0	0	4	4	4	4	0	49	16	27	92	1	1	1	3	6	6	5	6	4	5	5	6	3	4	5
518	2021-01-31 10:59:24	2021-01-31 11:05:14	00:05:50.957000	1	2	1	1	5	Andalucía	1	16	10	10	2	1	1	2	1	No	No	0	2	0	0	2	0	2	0	0	0	25	18	41	84	3	2	1	3	3	6	0	2	4	5	6	1	6	4	5
532	2021-01-31 12:13:45	2021-01-31 12:18:50	00:05:04.992000	1	2	1	1	5	Andalucía	1	3	10	10	2	2	2	1	1	No	No	0	2	2	0	0	0	2	0	0	0	52	16	36	104	2	1	1	3	6	6	6	6	5	6	6	6	6	5	6
604	2021-01-31 19:34:05	2021-01-31 19:39:08	00:05:01.968000	1	2	1	1	5	Andalucía	1	3	10	10	1	1	1	2	1	No	Sí, por confinamiento por contacto estrecho o sospecha de COVID-19	0	2	0	0	1	2	1	0	2	0	26	5	36	67	2	2	3	3	3	4	3	6	1	1	3	3	5	1	1
618	2021-01-31 21:45:45	2021-01-31 21:49:45	00:04:00.019000	1	2	2	1	5	Andalucía	2	8	10	10	3	1	1	1	1	No	No	1	0	0	0	0	0	0	0	0	0	26	18	39	83	2	2	1	3	3	4	4	6	5	5	4	4	3	6	5
672	2021-02-01 12:57:08	2021-02-01 13:01:55	00:04:47.971000	1	2	1	1	5	Andalucía	1	3	4	4	3	1	1	1	1	No	No	1	0	0	0	0	0	0	0	0	0	35	11	44	90	3	1	1	3	1	4	4	4	5	5	5	6	6	1	0
703	2021-02-01 13:39:27	2021-02-01 13:53:55	00:14:27.974000	1	2	1	1	5	Andalucía	1	4	4	4	1	1	1	1	1	No	No	1	0	0	0	0	0	0	0	0	0	45	21	34	100	2	1	1	3	5	5	5	6	5	5	6	6	4	5	5
737	2021-02-01 15:14:32	2021-02-01 15:22:54	00:08:23.021000	1	1	1	1	5	Andalucía	1	4	4	4	1	1	1	1	1	Sí, por primera vez en mi vida	No	0	0	0	0	0	0	2	0	0	0	34	14	31	79	2	1	1	3	4	5	4	6	3	3	4	4	4	4	3
748	2021-02-01 15:50:11	2021-02-01 15:54:26	00:04:14.016000	1	2	2	1	5	Andalucía	2	6	4	4	3	1	1	1	1	No	No	1	0	0	0	0	0	0	0	0	0	11	2	48	61	3	3	3	2	1	3	2	6	0	1	6	1	6	0	0
830	2021-02-01 21:12:22	2021-02-01 21:16:50	00:04:28.013000	1	2	1	1	5	Andalucía	1	4	4	4	1	1	1	3	2	No	Sí, por confinamiento por contacto estrecho o sospecha de COVID-19	0	0	0	0	2	0	3	0	0	0	44	15	39	98	2	1	1	3	5	5	5	4	4	5	5	5	5	4	4
880	2021-02-01 22:44:29	2021-02-01 22:50:45	00:06:16.013000	1	2	1	1	5	Andalucía	1	4	4	4	2	1	1	3	2	No	Sí, por confinamiento por contacto estrecho o sospecha de COVID-19	0	3	1	3	0	1	1	1	0	2	42	11	24	77	1	1	1	3	3	4	6	6	3	3	3	6	2	1	1
890	2021-02-01 23:20:32	2021-02-01 23:26:14	00:05:41.971000	1	2	1	1	5	Andalucía	1	4	4	4	1	1	1	1	1	Sí, por primera vez en mi vida	No	1	0	0	0	0	0	0	0	0	0	21	12	27	60	1	2	1	2	2	4	2	4	5	1	1	1	3	2	1
892	2021-02-01 23:30:05	2021-02-01 23:34:37	00:04:31.987000	1	1	1	1	5	Andalucía	1	4	4	4	2	1	1	1	1	No	No	1	0	0	0	0	0	0	0	0	0	52	24	39	115	2	1	1	3	6	6	5	4	6	6	5	6	6	5	3
900	2021-02-02 00:26:51	2021-02-02 00:31:26	00:04:33.974000	1	2	1	1	5	Andalucía	2	6	2	2	2	2	2	1	1	No	No	0	2	0	2	0	0	2	0	0	0	28	8	26	62	1	1	2	2	2	6	2	6	1	0	3	6	2	3	4
943	2021-02-02 11:27:49	2021-02-02 11:32:37	00:04:47.021000	1	2	1	1	5	Andalucía	1	4	4	4	1	1	1	3	2	No	No	0	0	0	3	2	0	1	0	3	0	18	6	38	62	2	3	2	2	4	3	0	4	0	0	4	3	4	3	2
964	2021-02-02 15:48:29	2021-02-02 15:55:13	00:06:44.957000	1	2	2	1	5	Andalucía	2	6	4	4	4	2	2	3	2	No	Sí, por confinamiento por contacto estrecho o sospecha de COVID-19	1	0	0	0	0	0	0	0	0	0	36	2	27	65	1	1	3	2	5	6	5	6	0	2	5	6	5	1	1
1026	2021-02-03 10:01:24	2021-02-03 10:07:02	00:05:36.960000	1	1	1	1	5	Andalucía	1	4	4	4	1	1	1	3	2	No	Sí, por confinamiento por contacto estrecho o sospecha de COVID-19	0	3	0	0	0	0	0	0	0	0	27	4	30	61	1	1	3	2	1	5	6	6	1	3	2	1	5	1	1
1065	2021-02-03 17:02:37	2021-02-03 17:07:16	00:04:38.035000	1	2	2	1	5	Andalucía	1	3	4	4	3	1	1	1	1	No	No	0	2	2	2	0	1	2	0	2	2	39	13	34	86	2	1	1	3	5	6	5	6	0	1	6	5	6	4	5
1105	2021-02-04 09:09:57	2021-02-04 09:17:00	00:07:03.014000	1	1	1	1	5	Andalucía	2	2	2	2	1	2	2	3	2	Sí, anteriormente estaba sin actividad laboral	Sí, por confinamiento por contacto estrecho o sospecha de COVID-19	0	4	0	0	4	4	0	0	0	0	33	16	40	89	2	1	1	3	3	5	4	6	2	4	3	4	6	4	4
278	2021-01-30 20:28:03	2021-01-30 20:31:29	00:03:25.978000	1	2	1	1	5	Aragón	1	3	10	10	1	1	1	2	1	No	Sí, por confinamiento por contacto estrecho o sospecha de COVID-19	0	0	0	1	0	0	0	1	0	0	17	7	42	66	3	3	2	2	2	4	2	6	0	1	4	1	6	5	1
293	2021-01-30 20:59:40	2021-01-30 21:04:52	00:05:11.990000	1	2	2	1	5	Aragón	2	2	12	14	4	1	1	1	1	No	No	0	0	0	0	0	0	0	1	0	0	5	3	39	47	2	3	3	2	0	3	0	6	0	0	4	0	3	3	0
296	2021-01-30 21:00:20	2021-01-30 21:08:00	00:07:39.994000	1	2	2	1	5	Aragón	2	6	2	2	3	1	1	2	1	No	No	0	0	0	0	0	0	1	0	0	0	43	24	16	83	1	1	1	3	5	5	4	4	4	6	5	6	1	5	6
302	2021-01-30 21:12:30	2021-01-30 21:19:46	00:07:17.011000	1	2	1	1	5	Aragón	1	8	1	14	2	2	2	1	1	No	No	0	0	0	0	0	2	2	0	0	2	40	10	26	76	1	1	1	3	3	6	5	4	2	5	4	6	3	3	1
337	2021-01-30 22:01:53	2021-01-30 22:09:02	00:07:10.013000	1	2	2	1	5	Aragón	2	7	10	10	3	2	2	1	1	No	No	1	0	0	0	0	0	0	0	0	0	14	0	41	55	3	3	3	2	3	2	2	6	0	0	1	1	6	0	0
351	2021-01-30 22:11:47	2021-01-30 22:16:52	00:05:06.029000	1	2	1	1	5	Aragón	1	3	10	10	1	2	2	1	1	No	No	0	0	0	0	0	0	2	0	0	0	22	8	37	67	2	2	2	3	3	3	3	6	1	0	3	3	6	3	3
355	2021-01-30 22:16:49	2021-01-30 22:21:38	00:04:49.008000	1	2	1	1	5	Aragón	1	8	13	14	3	2	2	1	1	No	No	1	0	0	0	0	0	0	0	0	0	21	6	31	58	2	2	2	2	0	3	2	6	0	1	5	6	6	3	2
374	2021-01-30 22:25:52	2021-01-30 22:35:17	00:09:24.019000	1	2	1	1	5	Aragón	1	3	10	10	1	1	1	3	2	No	Sí, por confinamiento por contacto estrecho o sospecha de COVID-19	0	4	0	4	0	0	4	0	0	4	25	0	48	73	3	2	3	3	1	6	2	6	0	0	6	5	6	0	0
397	2021-01-30 22:51:18	2021-01-30 22:57:15	00:05:58.042000	1	2	2	1	5	Aragón	1	3	10	10	2	1	1	1	1	No	No	0	0	2	0	2	2	2	0	0	0	40	16	36	92	2	1	1	3	5	5	5	6	4	4	5	5	5	5	5
408	2021-01-30 23:08:31	2021-01-30 23:12:26	00:03:53.971000	1	2	1	1	5	Aragón	1	3	10	10	1	2	2	3	2	Sí, por primera vez en mi vida	Sí, por confinamiento por contacto estrecho o sospecha de COVID-19	0	3	3	3	0	3	3	0	0	3	31	7	35	73	2	1	2	3	5	5	5	6	1	1	3	4	5	3	1
434	2021-01-30 23:44:52	2021-01-30 23:52:34	00:07:41.030000	1	2	4	1	5	Aragón	2	6	10	10	3	1	1	2	1	No	Sí, por confinamiento por contacto estrecho o sospecha de COVID-19	0	2	2	0	0	0	2	0	0	0	30	6	31	67	2	1	2	3	0	4	4	4	0	5	6	6	6	6	0
440	2021-01-30 23:54:39	2021-01-31 00:01:32	00:06:54.029000	1	2	1	1	5	Aragón	1	3	10	10	1	1	1	3	2	Sí, anteriormente estaba sin actividad laboral	No	1	0	0	0	0	0	0	0	0	0	17	4	34	55	2	3	3	2	3	5	3	6	0	1	3	0	5	1	3
446	2021-01-31 00:21:30	2021-01-31 00:29:10	00:07:39.994000	1	2	2	1	5	Aragón	2	4	10	10	1	1	1	1	1	No	No	0	0	0	0	1	1	0	0	0	1	12	0	35	47	2	3	3	2	0	3	0	6	0	0	1	1	6	0	0
528	2021-01-31 11:50:16	2021-01-31 12:01:41	00:11:24.029000	1	2	3	1	5	Aragón	1	3	1	14	3	2	2	1	1	No	No	1	0	0	0	0	0	0	0	0	0	29	0	28	57	1	1	3	2	3	6	6	6	0	2	2	2	6	0	0
588	2021-01-31 17:20:55	2021-01-31 17:28:24	00:07:29.021000	1	2	1	1	5	Aragón	1	3	10	10	1	2	2	2	1	Sí, por primera vez en mi vida	No	0	0	0	0	0	2	2	0	0	0	33	11	27	71	1	1	1	3	4	5	4	4	3	3	4	3	6	2	3
608	2021-01-31 20:28:49	2021-01-31 20:35:31	00:06:42.019000	2	2	1	1	5	Aragón	1	4	4	4	1	1	1	1	1	No	No	0	0	0	0	0	0	1	0	0	0	6	3	29	38	1	3	3	2	0	0	0	0	0	0	1	0	5	2	1
847	2021-02-01 21:35:14	2021-02-01 21:41:25	00:06:09.965000	1	1	1	1	5	Aragón	2	2	4	4	1	1	1	1	1	Sí, anteriormente estaba sin actividad laboral	Sí, por confinamiento por contacto estrecho o sospecha de COVID-19	1	0	0	0	0	0	0	0	0	0	6	4	37	47	2	3	3	2	1	1	0	4	1	1	1	0	4	2	0
884	2021-02-01 22:49:32	2021-02-01 22:56:42	00:07:10.963000	1	1	1	1	5	Aragón	1	3	4	4	1	2	2	3	2	Sí, por primera vez en mi vida	No	1	0	0	0	0	0	0	0	0	0	21	8	37	66	2	2	2	2	5	3	3	6	1	2	6	1	6	2	2
961	2021-02-02 14:47:36	2021-02-02 14:55:00	00:07:24.010000	1	2	1	1	5	Aragón	1	3	10	10	1	1	1	2	1	Sí, anteriormente estaba sin actividad laboral	Sí, por confinamiento por contacto estrecho o sospecha de COVID-19	0	2	2	0	1	0	2	0	0	0	13	10	27	50	1	3	1	2	3	2	2	6	1	1	0	0	1	4	5
1041	2021-02-03 13:28:43	2021-02-03 13:32:47	00:04:03.043000	1	1	1	1	5	Aragón	1	3	4	4	1	1	1	1	1	Sí, por primera vez en mi vida	No	1	0	0	0	0	0	0	0	0	0	36	18	39	93	2	1	1	3	5	5	5	4	5	3	4	5	6	3	3
1068	2021-02-03 17:21:21	2021-02-03 17:26:29	00:05:08.016000	1	2	1	1	5	Aragón	2	2	4	4	1	1	1	2	1	No	Sí, por confinamiento por contacto estrecho o sospecha de COVID-19	0	2	0	0	2	1	2	1	0	0	23	3	38	64	2	2	3	2	1	6	5	6	0	3	1	1	6	1	1
1081	2021-02-03 20:50:49	2021-02-03 20:58:20	00:07:31.008000	1	2	2	1	5	Aragón	2	6	2	2	3	1	1	2	1	No	Sí, por confinamiento por contacto estrecho o sospecha de COVID-19	0	1	2	2	1	1	1	1	1	0	21	3	42	66	3	2	3	2	1	5	1	6	1	4	4	1	6	2	0
34	2021-01-29 16:18:23	2021-01-29 16:27:00	00:08:35.981000	1	2	4	1	5	Canarias	1	4	4	4	4	1	1	1	1	No	No	0	0	0	0	0	1	1	1	0	0	10	1	48	59	3	3	3	2	1	2	1	6	0	0	6	3	6	1	0
407	2021-01-30 23:05:02	2021-01-30 23:12:00	00:06:56.966000	1	2	1	1	5	Canarias	1	3	10	10	1	1	1	3	2	No	Sí, por problemas de salud físicos	0	4	4	0	4	4	4	4	4	0	21	12	44	77	3	2	1	3	1	3	3	6	0	0	6	5	6	4	4
559	2021-01-31 13:44:17	2021-01-31 13:46:18	00:02:01.997000	1	2	1	1	5	Canarias	1	3	10	10	1	2	2	2	1	Sí, por primera vez en mi vida	Sí, por confinamiento por contacto estrecho o sospecha de COVID-19	1	0	0	0	0	0	0	0	0	0	0	0	0	0	1	3	3	1	#NULL!	#NULL!	#NULL!	#NULL!	#NULL!	#NULL!	#NULL!	#NULL!	#NULL!	#NULL!	#NULL!
709	2021-02-01 14:12:33	2021-02-01 14:16:27	00:03:53.971000	1	1	1	1	5	Canarias	1	4	4	4	3	1	1	1	1	No	No	1	0	0	0	0	0	0	0	0	0	24	9	32	65	2	2	2	2	2	4	4	6	0	1	4	3	6	3	3
725	2021-02-01 14:39:19	2021-02-01 14:45:48	00:06:28.973000	1	1	1	1	5	Canarias	1	16	4	4	2	1	1	1	1	No	No	1	0	0	0	0	0	0	0	0	0	46	6	31	83	2	1	2	3	6	5	5	4	2	5	5	6	5	0	0
952	2021-02-02 13:06:08	2021-02-02 13:10:18	00:04:10.992000	1	1	1	1	5	Canarias	1	1	4	4	1	2	2	2	1	No	Sí, por confinamiento por contacto estrecho o sospecha de COVID-19	0	0	0	0	0	0	0	0	0	1	20	9	23	52	1	2	2	2	4	3	3	4	3	3	1	1	5	2	1
16	2021-01-29 14:45:25	2021-01-29 14:54:55	00:09:29.030000	1	2	2	1	5	Cantabria	2	6	2	2	3	2	2	3	2	No	Sí, por confinamiento por contacto estrecho o sospecha de COVID-19	0	3	2	3	0	3	2	0	2	0	49	23	35	107	2	1	1	3	6	6	6	6	5	5	6	6	6	5	4
18	2021-01-29 15:03:13	2021-01-29 15:09:34	00:06:19.987000	1	2	1	1	5	Cantabria	2	6	2	2	2	2	2	1	1	No	No	0	0	0	0	0	0	2	1	0	0	31	15	34	80	2	1	1	3	2	6	5	4	5	2	5	5	5	5	5
23	2021-01-29 14:57:09	2021-01-29 15:18:54	00:21:44.035000	1	2	4	1	5	Cantabria	2	6	1	14	4	2	2	1	1	No	No	1	0	0	0	0	0	0	0	0	0	11	4	44	59	3	3	3	2	1	5	2	6	0	0	3	1	6	0	3
91	2021-01-29 20:15:41	2021-01-29 20:31:55	00:16:13.987000	1	2	5	1	5	Cantabria	2	6	1	14	4	2	2	1	1	No	No	0	2	0	2	0	0	0	0	0	0	35	3	35	73	2	1	3	3	2	6	4	6	1	3	6	6	6	1	0
93	2021-01-29 20:35:35	2021-01-29 20:42:45	00:07:10.963000	1	2	1	1	5	Cantabria	2	6	2	2	1	2	2	1	1	No	No	1	0	0	0	0	0	0	0	0	0	16	9	20	45	1	3	2	2	1	2	3	2	3	1	1	1	3	2	3
338	2021-01-30 22:04:53	2021-01-30 22:09:24	00:04:31.987000	1	1	2	1	5	Cantabria	1	4	10	10	3	1	1	1	1	No	No	0	2	0	0	1	1	1	0	1	1	38	16	46	100	3	1	1	3	1	6	6	6	5	6	6	5	6	5	5
345	2021-01-30 22:10:20	2021-01-30 22:12:10	00:01:49.987000	1	2	1	1	5	Cantabria	1	3	10	10	3	1	1	1	1	No	No	1	0	0	0	0	0	0	0	0	0	0	0	0	0	1	3	3	1	#NULL!	#NULL!	#NULL!	#NULL!	#NULL!	#NULL!	#NULL!	#NULL!	#NULL!	#NULL!	#NULL!
366	2021-01-30 22:25:05	2021-01-30 22:29:54	00:04:47.971000	1	2	2	1	5	Cantabria	1	4	10	10	1	1	1	1	1	No	No	1	0	0	0	0	0	0	0	0	0	25	8	41	74	3	2	2	3	3	5	3	6	0	0	3	3	6	4	4
553	2021-01-31 13:23:03	2021-01-31 13:27:30	00:04:26.026000	1	2	1	1	5	Cantabria	1	3	10	10	1	3	1	3	2	Sí, anteriormente estaba sin actividad laboral	Sí, por confinamiento por contacto estrecho o sospecha de COVID-19	0	4	0	0	0	4	2	0	4	0	0	0	0	0	1	3	3	1	#NULL!	#NULL!	#NULL!	#NULL!	#NULL!	#NULL!	#NULL!	#NULL!	#NULL!	#NULL!	#NULL!
791	2021-02-01 19:37:34	2021-02-01 19:41:14	00:03:39.024000	1	2	1	1	5	Cantabria	1	1	10	10	3	1	1	1	1	No	No	1	0	0	0	0	0	0	0	0	0	10	3	48	61	3	3	3	2	1	1	1	6	0	1	6	1	6	1	2
838	2021-02-01 21:15:56	2021-02-01 21:23:27	00:07:29.971000	1	2	3	1	5	Cantabria	2	6	2	2	4	1	1	1	1	No	No	1	0	0	0	0	0	0	0	0	0	47	27	12	86	1	1	1	3	5	4	6	4	3	5	0	6	3	6	6
855	2021-02-01 21:51:14	2021-02-01 22:00:37	00:09:22.982000	1	2	4	1	5	Cantabria	2	8	2	2	4	2	2	1	1	No	No	1	0	0	0	0	0	0	0	0	0	21	11	42	74	3	2	1	3	1	5	5	6	0	1	6	1	6	6	5
859	2021-02-01 22:05:15	2021-02-01 22:18:33	00:13:17.040000	1	2	3	1	5	Cantabria	2	6	2	2	4	1	1	1	1	No	No	1	0	0	0	0	0	0	0	0	0	8	5	40	53	2	3	3	2	1	1	1	6	5	1	5	1	1	0	0
861	2021-02-01 22:17:53	2021-02-01 22:21:52	00:03:58.032000	1	2	3	1	5	Cantabria	2	8	2	2	4	2	2	1	1	No	No	1	0	0	0	0	0	0	0	0	0	27	14	26	67	1	1	1	3	4	4	4	4	2	1	1	3	4	6	5
877	2021-02-01 22:43:28	2021-02-01 22:47:47	00:04:17.990000	1	2	1	1	5	Cantabria	2	8	2	2	1	2	2	1	1	No	No	1	0	0	0	0	0	0	0	0	0	8	3	24	35	1	3	3	2	0	2	0	6	1	2	1	1	3	1	1
887	2021-02-01 22:57:38	2021-02-01 23:07:23	00:09:45.965000	1	2	1	1	5	Cantabria	2	7	2	2	1	1	1	1	1	No	No	1	0	0	0	0	0	0	0	0	0	20	14	35	69	2	2	1	3	0	2	3	4	3	2	5	2	5	3	3
895	2021-02-01 23:50:02	2021-02-01 23:55:31	00:05:29.962000	1	2	1	1	5	Cantabria	1	3	4	4	1	1	1	1	1	Sí, por primera vez en mi vida	No	0	0	0	0	1	1	0	1	0	0	13	2	48	63	3	3	3	2	1	6	2	6	0	0	6	1	6	2	0
1067	2021-02-03 17:15:50	2021-02-03 17:22:03	00:06:12.038000	1	1	1	1	5	Cantabria	2	2	4	4	2	3	1	1	1	No	No	1	0	0	0	0	0	0	0	0	0	11	9	47	67	3	3	2	3	1	4	1	6	1	1	6	1	6	2	1
1149	2021-02-07 10:35:41	2021-02-07 10:41:40	00:05:58.042000	1	2	2	1	5	Cantabria	2	6	2	2	3	1	1	1	1	No	No	1	0	0	0	0	0	0	0	0	0	51	27	16	94	1	1	1	3	4	6	6	4	5	6	6	6	1	6	6
1150	2021-02-07 10:43:49	2021-02-07 10:49:46	00:05:57.005000	1	2	1	1	5	Cantabria	2	6	2	2	1	2	2	1	1	No	No	0	2	0	0	1	2	2	1	0	0	35	17	13	65	1	1	1	2	3	4	5	6	3	5	1	5	0	6	6
1151	2021-02-07 10:43:49	2021-02-07 11:02:25	00:18:36.979000	1	2	1	1	5	Cantabria	2	6	2	2	1	2	2	1	1	No	No	0	2	0	0	1	2	2	1	0	0	35	17	13	65	1	1	1	2	3	4	5	6	3	5	1	5	0	6	6
1155	2021-02-07 16:55:20	2021-02-07 17:03:38	00:08:18.960000	1	2	1	1	5	Cantabria	2	6	2	2	2	2	2	1	1	No	No	0	0	0	0	0	0	1	0	1	0	31	13	31	75	2	1	1	3	2	5	5	4	3	3	3	3	4	4	2
1156	2021-02-07 17:23:25	2021-02-07 17:29:30	00:06:05.990000	1	2	2	1	5	Cantabria	2	6	2	2	3	2	2	1	1	No	No	0	0	0	0	0	0	0	1	0	0	13	10	37	60	2	3	1	2	1	4	0	4	4	0	5	3	4	0	1
292	2021-01-30 20:55:03	2021-01-30 21:04:12	00:09:08.035000	1	2	1	1	5	Castilla y León	1	3	10	10	1	1	1	2	1	Sí, anteriormente estaba sin actividad laboral	No	1	0	0	0	0	0	0	0	0	0	32	12	37	81	2	1	1	3	3	6	5	6	1	3	5	3	6	4	3
301	2021-01-30 21:10:42	2021-01-30 21:14:11	00:03:27.965000	1	2	1	1	5	Castilla y León	2	3	10	10	1	1	1	1	1	No	No	0	1	0	0	0	0	1	1	0	0	34	9	28	71	1	1	2	3	3	6	6	4	2	4	5	6	3	0	1
303	2021-01-30 21:13:38	2021-01-30 21:20:12	00:06:35.021000	1	2	1	1	5	Castilla y León	1	3	10	10	1	2	2	3	2	Sí, anteriormente estaba sin actividad laboral	Sí, por confinamiento por contacto estrecho o sospecha de COVID-19	0	0	0	0	4	0	0	0	4	0	12	4	41	57	3	3	3	2	0	5	6	6	0	0	4	0	6	0	4
322	2021-01-30 21:44:28	2021-01-30 21:50:39	00:06:09.965000	1	2	1	1	5	Castilla y León	1	3	10	10	1	1	1	2	1	Sí, por primera vez en mi vida	Sí, por confinamiento por contacto estrecho o sospecha de COVID-19	0	2	0	2	0	2	0	0	0	0	5	12	43	60	3	3	1	2	3	0	0	4	3	1	5	0	6	6	3
340	2021-01-30 22:04:18	2021-01-30 22:09:37	00:05:18.038000	1	2	1	1	5	Castilla y León	1	3	4	4	1	2	2	1	1	No	No	0	1	0	0	2	2	2	0	0	0	44	17	27	88	1	1	1	3	3	6	6	6	3	3	5	6	5	6	5
343	2021-01-30 22:06:11	2021-01-30 22:10:50	00:04:38.986000	1	2	1	1	5	Castilla y León	1	3	10	10	1	1	1	1	1	No	No	1	0	0	0	0	0	0	0	0	0	13	1	26	40	1	3	3	2	1	3	1	6	0	1	0	0	0	0	0
361	2021-01-30 22:14:57	2021-01-30 22:24:15	00:09:17.021000	1	1	1	1	5	Castilla y León	1	3	10	10	1	2	2	3	2	No	Sí, por confinamiento por contacto estrecho o sospecha de COVID-19	0	4	4	4	4	4	4	0	0	0	40	9	42	91	3	1	2	3	0	4	4	6	1	5	6	5	6	1	3
396	2021-01-30 22:46:29	2021-01-30 22:56:30	00:10:00.998000	1	2	3	1	5	Castilla y León	1	3	10	10	4	2	2	3	2	Sí, anteriormente estaba sin actividad laboral	Sí, por confinamiento por contacto estrecho o sospecha de COVID-19	0	4	2	0	0	2	2	0	0	0	46	12	43	101	3	1	1	3	3	6	3	6	0	5	6	6	6	6	6
404	2021-01-30 23:05:18	2021-01-30 23:09:20	00:04:02.006000	1	2	1	1	5	Castilla y León	1	3	10	10	1	2	2	2	1	No	Sí, por confinamiento por contacto estrecho o sospecha de COVID-19	1	0	0	0	0	0	0	0	0	0	15	4	37	56	2	3	3	2	3	1	0	6	0	3	4	1	6	2	1
406	2021-01-30 23:06:19	2021-01-30 23:11:22	00:05:01.968000	1	2	1	1	5	Castilla y León	1	3	10	10	1	1	1	1	1	No	No	0	2	0	0	0	0	1	0	0	0	35	15	32	82	2	1	1	3	3	4	4	6	6	0	4	6	5	3	3
423	2021-01-30 23:16:32	2021-01-30 23:26:12	00:09:40.003000	1	2	2	1	5	Castilla y León	1	3	10	10	2	2	2	3	2	No	Sí, por confinamiento por contacto estrecho o sospecha de COVID-19	1	0	0	0	0	0	0	0	0	0	24	8	28	60	1	2	2	2	1	5	5	6	0	1	2	3	3	3	2
429	2021-01-30 23:28:23	2021-01-30 23:36:44	00:08:21.984000	1	2	1	1	5	Castilla y León	1	3	10	10	2	2	2	3	2	No	Sí, por confinamiento por contacto estrecho o sospecha de COVID-19	0	0	0	2	0	0	1	0	0	0	21	5	35	61	2	2	3	2	3	5	2	6	1	2	6	3	3	2	1
433	2021-01-30 23:40:18	2021-01-30 23:51:05	00:10:46.013000	1	2	1	1	5	Castilla y León	2	3	10	10	1	1	1	1	1	No	No	1	0	0	0	0	0	0	0	0	0	9	0	39	48	2	3	3	2	0	3	1	6	0	1	0	1	6	0	0
454	2021-01-31 01:34:38	2021-01-31 01:42:15	00:07:36.019000	1	2	2	1	5	Castilla y León	1	3	11	14	3	1	1	1	1	No	No	0	2	0	0	0	2	2	0	0	2	40	9	36	85	2	1	2	3	2	6	3	6	1	5	6	6	6	3	1
480	2021-01-31 09:11:21	2021-01-31 09:18:59	00:07:38.957000	1	2	2	1	5	Castilla y León	1	3	10	10	2	2	2	3	2	No	Sí, por problemas de salud físicos	0	4	0	0	4	0	0	0	0	0	22	12	47	81	3	2	1	3	4	6	0	6	0	0	6	1	6	6	6
495	2021-01-31 09:56:17	2021-01-31 10:00:54	00:04:36.998000	1	2	2	1	5	Castilla y León	2	17	10	10	3	1	1	4	2	No	Sí, por problemas de salud físicos	0	2	4	4	0	1	4	0	0	0	34	13	26	73	1	1	1	3	3	3	3	1	1	5	5	5	4	5	5
522	2021-01-31 11:13:24	2021-01-31 11:23:23	00:09:59.011000	1	2	1	1	5	Castilla y León	1	3	13	14	1	2	2	1	1	No	No	0	2	1	0	2	0	2	1	0	0	34	10	30	74	1	1	1	3	3	5	5	3	3	3	3	5	4	3	2
531	2021-01-31 12:14:08	2021-01-31 12:18:31	00:04:23.002000	1	2	1	1	5	Castilla y León	1	3	10	10	1	2	2	3	2	No	Sí, por problemas de salud físicos	0	4	2	4	4	4	4	1	0	0	32	6	31	69	2	1	2	3	5	5	5	6	0	0	4	5	6	3	2
533	2021-01-31 12:09:08	2021-01-31 12:19:51	00:10:42.989000	1	2	1	1	5	Castilla y León	1	4	4	4	1	1	1	1	1	No	No	0	0	2	0	0	0	2	0	1	0	34	7	18	59	1	1	2	2	3	3	3	4	3	5	5	5	3	2	1
539	2021-01-31 12:40:17	2021-01-31 12:45:48	00:05:32.035000	1	1	1	1	5	Castilla y León	1	3	10	10	1	2	2	3	2	Sí, por primera vez en mi vida	Sí, por confinamiento por contacto estrecho o sospecha de COVID-19	1	0	0	0	0	0	0	0	0	0	15	3	45	63	3	3	3	2	2	2	0	6	2	1	4	0	6	1	0
543	2021-01-31 12:39:20	2021-01-31 12:52:18	00:12:58.982000	1	1	5	1	5	Castilla y León	2	2	7	7	4	2	2	1	1	No	No	1	0	0	0	0	0	0	0	0	0	34	17	30	81	1	1	1	3	3	6	1	6	3	2	3	5	5	5	5
555	2021-01-31 13:26:22	2021-01-31 13:32:40	00:06:18	1	2	1	1	5	Castilla y León	1	4	10	10	2	1	1	1	1	No	No	0	2	2	0	0	2	0	1	0	0	40	13	40	93	2	1	1	3	5	6	6	6	1	1	6	6	5	6	6
568	2021-01-31 14:04:13	2021-01-31 14:13:29	00:09:15.984000	1	2	1	1	5	Castilla y León	1	3	10	10	1	2	2	3	2	No	Sí, por confinamiento por contacto estrecho o sospecha de COVID-19	0	2	0	0	2	1	1	0	0	0	44	7	37	88	2	1	2	3	5	5	4	6	0	3	6	5	4	1	1
586	2021-01-31 16:34:19	2021-01-31 16:41:17	00:06:58.003000	1	2	2	1	5	Castilla y León	1	5	3	14	3	1	1	1	1	No	No	1	0	0	0	0	0	0	0	0	0	22	13	30	65	1	2	1	2	2	2	2	2	2	2	6	2	6	4	2
708	2021-02-01 13:00:21	2021-02-01 14:11:44	01:11:23.971000	1	2	1	1	5	Castilla y León	1	3	4	4	3	2	2	3	2	No	Sí, por confinamiento por contacto estrecho o sospecha de COVID-19	0	4	4	4	4	4	4	4	0	0	36	12	29	77	1	1	1	3	3	6	4	4	0	3	3	5	4	6	5
710	2021-02-01 14:11:08	2021-02-01 14:17:12	00:06:04.003000	2	2	1	1	5	Castilla y León	2	2	7	7	1	2	2	3	2	No	Sí, por confinamiento por contacto estrecho o sospecha de COVID-19	0	0	2	0	2	0	2	4	0	0	50	7	33	90	2	1	2	3	5	6	6	4	0	6	6	6	5	1	0
715	2021-02-01 14:18:44	2021-02-01 14:30:31	00:11:47.011000	1	1	2	1	5	Castilla y León	2	2	7	7	3	2	2	2	1	No	Sí, por confinamiento por contacto estrecho o sospecha de COVID-19	0	2	1	0	2	1	0	1	0	0	43	23	28	94	1	1	1	3	5	5	3	2	3	5	5	5	1	5	5
717	2021-02-01 14:27:23	2021-02-01 14:30:54	00:03:30.038000	1	1	1	1	5	Castilla y León	2	2	7	7	2	2	2	1	1	No	No	1	0	0	0	0	0	0	0	0	0	51	29	21	101	1	1	1	3	6	5	5	4	6	6	3	6	2	6	6
742	2021-02-01 15:37:56	2021-02-01 15:44:04	00:06:07.978000	1	2	1	1	5	Castilla y León	1	4	4	4	2	1	1	3	2	No	Sí, por confinamiento por contacto estrecho o sospecha de COVID-19	0	4	4	4	0	0	4	0	0	0	12	2	45	59	3	3	3	2	1	3	1	6	0	0	6	1	6	1	1
744	2021-02-01 15:40:54	2021-02-01 15:47:36	00:06:42.019000	1	2	1	1	5	Castilla y León	1	4	4	4	2	1	1	1	1	No	No	0	1	1	0	0	0	1	0	2	0	43	14	29	86	1	1	1	3	3	4	5	6	1	6	6	6	3	3	1
756	2021-02-01 16:34:28	2021-02-01 16:39:10	00:04:42.010000	1	2	2	1	5	Castilla y León	2	6	2	2	3	2	2	1	1	No	No	1	0	0	0	0	0	0	0	0	0	42	8	30	80	1	1	2	3	4	6	5	4	0	1	6	4	6	3	0
772	2021-02-01 17:54:37	2021-02-01 18:01:53	00:07:15.974000	1	2	4	1	5	Castilla y León	2	2	7	7	4	2	2	1	1	No	No	0	0	0	0	0	0	0	1	0	0	50	3	10	63	1	1	3	2	6	6	5	3	0	6	1	6	1	1	1
869	2021-02-01 22:28:01	2021-02-01 22:35:43	00:07:43.018000	1	2	5	1	5	Castilla y León	2	2	7	7	4	2	2	1	1	No	No	1	0	0	0	0	0	0	0	0	0	17	3	45	65	3	3	3	2	3	3	2	6	0	2	6	2	6	1	1
904	2021-02-02 00:53:09	2021-02-02 00:58:47	00:05:37.997000	1	2	1	1	5	Castilla y León	1	4	4	4	1	1	1	1	1	No	No	0	0	2	0	0	0	0	0	0	0	31	7	45	83	3	1	2	3	1	4	5	6	0	4	5	4	6	5	1
924	2021-02-02 09:46:06	2021-02-02 09:51:49	00:05:41.971000	1	2	1	1	5	Castilla y León	1	3	11	14	2	1	1	1	1	No	No	1	0	0	0	0	0	0	0	0	0	13	4	41	58	3	3	3	2	0	3	2	6	0	0	1	1	6	1	3
1030	2021-02-03 10:38:40	2021-02-03 10:45:02	00:06:21.974000	1	2	1	1	5	Castilla y León	2	6	2	2	1	2	2	1	1	No	No	0	2	0	0	1	2	2	0	0	0	31	15	32	78	2	1	1	3	2	6	4	6	1	2	4	5	4	4	4
307	2021-01-30 21:23:20	2021-01-30 21:25:50	00:02:29.040000	1	1	2	1	5	Castilla-La Mancha	2	16	10	10	4	1	1	3	2	No	Sí, por problemas de salud físicos	1	0	0	0	0	0	0	0	0	0	0	0	0	0	1	3	3	1	#NULL!	#NULL!	#NULL!	#NULL!	#NULL!	#NULL!	#NULL!	#NULL!	#NULL!	#NULL!	#NULL!
329	2021-01-30 21:58:05	2021-01-30 22:03:36	00:05:30.998000	1	1	2	1	5	Castilla-La Mancha	2	9	10	10	4	1	1	3	2	No	Sí, por confinamiento por contacto estrecho o sospecha de COVID-19	0	4	0	0	0	4	1	0	0	0	9	0	43	52	3	3	3	2	1	3	1	6	0	1	1	1	6	0	0
330	2021-01-30 22:01:01	2021-01-30 22:04:04	00:03:02.995000	1	2	1	1	5	Castilla-La Mancha	2	17	10	10	1	1	1	1	1	No	Sí, por problemas de salud físicos	1	0	0	0	0	0	0	0	0	0	22	11	34	67	2	2	1	3	0	4	4	6	3	3	4	3	3	3	3
346	2021-01-30 22:08:57	2021-01-30 22:13:11	00:04:14.966000	1	2	1	1	5	Castilla-La Mancha	2	2	10	10	1	1	1	2	1	No	No	1	0	0	0	0	0	0	0	0	0	31	6	36	73	2	1	2	3	0	6	5	6	0	2	5	1	6	0	6
347	2021-01-30 22:02:58	2021-01-30 22:13:42	00:10:44.026000	1	1	1	1	5	Castilla-La Mancha	1	3	10	10	1	2	2	4	2	Sí, anteriormente estaba sin actividad laboral	No	0	0	0	0	4	4	4	0	4	0	26	3	40	69	2	2	3	3	3	5	4	6	0	1	5	3	5	1	1
348	2021-01-30 22:03:50	2021-01-30 22:13:42	00:09:52.013000	1	2	1	1	5	Castilla-La Mancha	1	3	10	10	1	2	2	4	2	No	Sí, por problemas de salud físicos	0	4	0	0	0	0	4	0	0	0	30	6	31	67	2	1	2	3	5	6	4	6	1	1	0	4	4	1	1
352	2021-01-30 22:09:37	2021-01-30 22:17:43	00:08:06	1	2	1	1	5	Castilla-La Mancha	1	3	10	10	2	2	2	2	1	No	No	0	2	2	0	1	2	1	0	0	0	52	22	23	97	1	1	1	3	6	6	6	4	5	5	5	6	6	6	5
358	2021-01-30 22:18:12	2021-01-30 22:23:21	00:05:08.016000	1	2	2	1	5	Castilla-La Mancha	1	3	10	10	2	2	2	4	2	No	No	0	0	0	0	0	1	1	0	0	0	33	13	31	77	2	1	1	3	4	3	2	4	5	5	5	5	3	3	2
369	2021-01-30 22:13:56	2021-01-30 22:31:27	00:17:30.970000	1	2	1	1	5	Castilla-La Mancha	1	3	10	10	1	2	2	3	2	No	Sí, por problemas de salud físicos	0	4	0	0	0	4	4	0	0	0	40	16	32	88	2	1	1	3	6	6	5	4	5	0	5	6	3	4	6
380	2021-01-30 22:36:56	2021-01-30 22:43:36	00:06:40.982000	1	2	1	1	5	Castilla-La Mancha	1	3	1	14	1	2	2	1	1	No	No	1	0	0	0	0	0	0	0	0	0	49	23	31	103	2	1	1	3	6	6	6	4	6	5	6	6	5	6	6
422	2021-01-30 23:16:25	2021-01-30 23:25:32	00:09:05.962000	1	2	1	1	5	Castilla-La Mancha	1	3	10	10	3	1	1	1	1	No	No	1	0	0	0	0	0	0	0	0	0	9	2	35	46	2	3	3	2	1	1	1	4	0	1	6	1	5	1	1
447	2021-01-31 00:39:09	2021-01-31 00:44:23	00:05:13.978000	1	2	2	1	5	Castilla-La Mancha	1	3	13	14	3	2	2	3	2	No	No	0	0	0	0	0	0	4	0	0	0	31	14	27	72	1	1	1	3	1	6	3	6	3	1	6	3	1	3	1
456	2021-01-31 02:50:04	2021-01-31 02:57:28	00:07:24.960000	1	2	1	1	5	Castilla-La Mancha	1	3	10	10	1	2	2	3	2	No	No	0	0	0	1	0	0	1	1	0	0	12	6	39	57	2	3	2	2	2	1	1	6	0	1	2	1	6	2	2
458	2021-01-31 03:39:23	2021-01-31 03:46:04	00:06:42.019000	1	2	1	1	5	Castilla-La Mancha	1	3	10	10	2	2	2	1	1	No	No	0	0	0	0	0	0	1	0	0	0	21	17	36	74	2	2	1	3	2	5	4	6	5	2	4	2	6	6	6
479	2021-01-31 09:08:47	2021-01-31 09:18:34	00:09:45.965000	1	2	1	1	5	Castilla-La Mancha	1	3	10	10	1	2	2	3	2	No	Sí, por confinamiento por contacto estrecho o sospecha de COVID-19	0	4	0	4	4	0	4	0	0	0	29	4	36	69	2	1	3	3	4	5	4	6	0	0	5	4	5	0	0
529	2021-01-31 11:58:18	2021-01-31 12:09:17	00:10:58.973000	1	2	1	1	5	Castilla-La Mancha	2	3	10	10	1	1	1	3	2	No	Sí, por problemas de salud físicos	0	3	0	3	0	3	3	3	0	0	25	3	26	54	1	2	3	2	3	3	3	0	0	2	4	4	4	2	1
616	2021-01-31 21:27:59	2021-01-31 21:36:27	00:08:28.032000	1	2	1	1	5	Castilla-La Mancha	1	3	10	10	1	2	2	4	2	No	No	0	2	0	0	2	0	2	0	0	0	45	17	29	91	1	1	1	3	4	6	6	4	5	4	5	6	5	3	3
661	2021-02-01 12:18:50	2021-02-01 12:25:43	00:06:52.992000	1	1	1	1	5	Castilla-La Mancha	1	3	4	4	1	2	2	1	1	Sí, por primera vez en mi vida	No	1	0	0	0	0	0	0	0	0	0	9	1	36	46	2	3	3	2	3	1	0	6	0	0	3	1	6	1	0
910	2021-02-02 08:26:35	2021-02-02 08:31:29	00:04:54.970000	1	2	1	1	5	Castilla-La Mancha	1	4	4	4	2	1	1	3	2	Sí, por primera vez en mi vida	Sí, por confinamiento por contacto estrecho o sospecha de COVID-19	0	3	0	3	0	0	3	0	3	0	47	13	40	100	2	1	1	3	6	4	6	6	1	5	3	6	5	5	0
920	2021-02-02 09:13:57	2021-02-02 09:19:20	00:05:22.963000	1	1	1	1	5	Castilla-La Mancha	1	1	4	4	1	1	1	3	2	Sí, por primera vez en mi vida	Sí, por confinamiento por contacto estrecho o sospecha de COVID-19	0	0	0	3	0	0	0	0	0	0	17	11	34	62	2	3	1	2	0	1	1	4	1	1	2	2	5	0	4
1029	2021-02-03 10:33:23	2021-02-03 10:40:18	00:06:56.016000	2	1	1	1	5	Castilla-La Mancha	1	1	4	4	1	1	1	1	1	Sí, anteriormente estaba sin actividad laboral	No	0	0	0	0	2	2	0	0	0	0	29	6	21	56	1	1	2	2	4	4	2	4	0	2	0	4	3	4	2
1034	2021-02-03 11:39:23	2021-02-03 11:41:21	00:01:58.973000	1	2	1	1	5	Castilla-La Mancha	1	4	4	4	2	1	1	3	2	No	Sí, por confinamiento por contacto estrecho o sospecha de COVID-19	0	0	0	0	0	2	1	0	0	1	37	14	40	91	2	1	1	3	3	4	3	4	3	2	3	5	5	5	3
1058	2021-02-03 16:00:24	2021-02-03 16:05:29	00:05:04.042000	1	1	1	1	5	Castilla-La Mancha	1	4	4	4	1	1	1	1	1	No	No	1	0	0	0	0	0	0	0	0	0	5	2	42	49	3	3	3	2	1	0	0	6	0	1	6	0	6	1	0
1064	2021-02-03 17:01:14	2021-02-03 17:07:07	00:05:53.981000	1	1	1	1	5	Castilla-La Mancha	1	3	4	4	1	1	1	1	1	No	No	0	2	2	0	2	2	2	0	2	0	24	13	27	64	1	2	1	2	1	5	1	3	3	3	4	4	5	2	1
482	2021-01-31 09:18:38	2021-01-31 09:22:24	00:03:46.022000	2	1	1	1	5	Catalunya	2	6	4	4	1	2	2	1	1	Sí, anteriormente estaba sin actividad laboral	No	1	0	0	0	0	0	0	0	0	0	9	6	36	51	2	3	2	2	0	0	1	6	2	1	5	1	5	0	2
502	2021-01-31 10:11:53	2021-01-31 10:19:20	00:07:27.034000	1	1	5	1	5	Catalunya	1	4	7	7	4	2	2	1	1	No	No	0	0	1	0	0	1	0	0	1	1	38	10	44	92	3	1	1	3	3	3	3	6	0	5	6	4	6	4	5
557	2021-01-31 13:32:59	2021-01-31 13:39:26	00:06:26.986000	2	2	4	1	5	Catalunya	2	17	11	14	4	1	1	1	1	No	No	0	0	0	0	0	0	0	1	0	2	30	15	23	68	1	1	1	3	4	5	5	6	4	0	0	4	1	2	5
978	2021-02-02 18:15:35	2021-02-02 18:25:05	00:09:29.981000	2	2	3	1	5	Catalunya	2	6	2	2	4	1	1	1	1	No	No	0	2	0	0	0	2	2	0	0	0	19	7	42	68	3	3	2	3	3	6	5	6	0	0	6	2	6	6	1
4	2021-01-26 12:49:03	2021-01-26 12:52:01	00:02:57.034000	2	1	4	1	5	Catalunya	1	3	7	7	4	2	2	1	1	No	No	1	0	0	0	0	0	0	0	0	0	6	7	42	55	3	3	2	2	0	1	0	6	2	2	5	0	5	1	1
5	2021-01-26 12:49:05	2021-01-26 12:53:28	00:04:21.965000	1	1	1	1	5	Catalunya	1	17	4	4	1	1	1	4	2	Sí, por primera vez en mi vida	Sí, por confinamiento por contacto estrecho o sospecha de COVID-19	0	0	0	0	4	0	0	0	0	0	44	18	36	98	2	1	1	3	5	5	5	4	0	5	5	6	3	5	5
6	2021-01-26 12:49:00	2021-01-26 12:54:48	00:05:46.982000	1	2	2	1	5	Catalunya	1	4	4	4	3	1	1	1	1	No	No	1	0	0	0	0	0	0	0	0	0	3	2	48	53	3	3	3	2	0	1	0	6	0	1	6	0	6	2	0
7	2021-01-26 12:49:12	2021-01-26 12:55:39	00:06:26.986000	2	2	2	1	5	Catalunya	1	17	4	4	1	1	1	1	1	No	No	0	0	0	2	0	0	1	0	0	0	0	0	18	18	1	3	3	1	0	0	0	0	0	0	0	0	0	0	0
8	2021-01-29 14:12:09	2021-01-29 14:17:29	00:05:20.976000	2	1	1	1	5	Catalunya	1	4	4	4	1	1	1	4	2	No	Sí, por confinamiento por contacto estrecho o sospecha de COVID-19	1	0	0	0	0	0	0	0	0	0	12	8	35	55	2	3	2	2	1	2	2	4	2	3	2	1	5	1	1
10	2021-01-29 14:25:39	2021-01-29 14:29:46	00:04:05.981000	1	2	1	1	5	Catalunya	1	4	4	4	2	1	1	1	1	No	No	1	0	0	0	0	0	0	0	0	0	8	2	46	56	3	3	3	2	1	1	1	6	0	0	6	2	5	1	1
11	2021-01-29 14:30:09	2021-01-29 14:36:30	00:06:19.987000	1	2	3	1	5	Catalunya	1	3	13	14	3	1	1	1	1	No	No	1	0	0	0	0	0	0	0	0	0	26	16	38	80	2	2	1	3	1	5	3	4	0	4	6	5	6	5	5
13	2021-01-29 14:33:48	2021-01-29 14:38:44	00:04:56.006000	1	2	1	1	5	Catalunya	2	7	4	4	2	2	2	1	1	No	No	0	2	0	0	2	2	2	0	0	0	24	10	39	73	2	2	1	3	1	5	3	6	3	0	3	4	6	2	4
14	2021-01-29 14:35:57	2021-01-29 14:42:05	00:06:09.014000	1	2	3	1	5	Catalunya	1	4	4	4	4	1	1	1	1	No	No	0	2	1	0	1	0	2	1	0	2	42	12	47	101	3	1	1	3	5	6	5	6	0	3	6	6	6	6	6
15	2021-01-29 14:38:43	2021-01-29 14:47:32	00:08:47.990000	1	1	2	1	5	Catalunya	1	3	2	2	3	2	2	2	1	No	No	0	2	0	0	0	0	2	0	0	0	40	16	27	83	1	1	1	3	1	6	4	4	1	3	4	6	2	5	5
17	2021-01-29 14:51:41	2021-01-29 14:56:50	00:05:08.966000	1	2	4	1	5	Catalunya	2	2	7	7	4	2	2	1	1	No	No	1	0	0	0	0	0	0	0	0	0	37	6	42	85	3	1	2	3	6	6	6	6	0	1	6	6	6	0	0
19	2021-01-29 15:01:30	2021-01-29 15:12:08	00:10:37.978000	1	1	2	1	5	Catalunya	2	2	7	7	3	2	2	1	1	No	No	1	0	0	0	0	0	0	0	0	0	30	11	28	69	1	1	1	3	2	5	2	6	4	4	3	4	6	2	2
21	2021-01-29 14:39:28	2021-01-29 15:13:54	00:34:25.997000	1	1	1	1	5	Catalunya	2	8	7	7	1	2	2	3	2	No	Sí, por confinamiento por contacto estrecho o sospecha de COVID-19	1	0	0	0	0	0	0	0	0	0	5	0	47	52	3	3	3	2	0	3	1	6	0	1	6	0	6	0	0
22	2021-01-29 15:05:46	2021-01-29 15:17:42	00:11:57.034000	1	2	4	1	5	Catalunya	2	9	2	2	4	2	2	1	1	No	No	0	0	0	0	0	1	1	1	1	1	40	12	39	91	2	1	1	3	3	6	1	6	0	5	6	6	6	6	6
24	2021-01-29 15:16:08	2021-01-29 15:21:18	00:05:08.966000	1	1	1	1	5	Catalunya	1	4	4	4	2	1	1	2	1	No	Sí, por confinamiento por contacto estrecho o sospecha de COVID-19	0	0	0	0	0	0	2	0	0	0	41	21	22	84	1	1	1	3	4	5	3	3	5	6	1	4	2	5	2
25	2021-01-29 15:24:19	2021-01-29 15:30:11	00:05:51.043000	2	1	3	1	5	Catalunya	2	2	4	4	4	2	2	1	1	No	No	1	0	0	0	0	0	0	0	0	0	18	13	39	70	2	3	1	3	1	3	1	6	1	1	6	2	6	2	4
27	2021-01-29 15:26:14	2021-01-29 15:34:06	00:07:52.003000	2	2	3	1	5	Catalunya	1	4	4	4	4	1	1	4	2	No	Sí, por problemas de salud físicos	0	4	0	0	0	0	4	0	4	4	24	4	43	71	3	2	3	3	1	4	3	6	0	2	6	2	6	1	0
29	2021-01-29 15:34:48	2021-01-29 15:40:42	00:05:53.981000	1	2	3	1	5	Catalunya	2	11	4	4	4	2	2	2	1	No	No	0	0	0	0	2	0	0	1	0	2	10	6	37	53	2	3	2	2	2	1	2	6	0	2	5	1	6	4	2
30	2021-01-29 15:41:06	2021-01-29 15:48:46	00:07:39.994000	1	2	3	1	5	Catalunya	2	2	7	7	3	1	1	1	1	No	No	1	0	0	0	0	0	0	0	0	0	33	3	48	84	3	1	3	3	4	6	4	6	0	3	6	4	6	1	1
31	2021-01-29 15:54:41	2021-01-29 16:00:35	00:05:55.018000	1	1	3	1	5	Catalunya	1	4	4	4	4	1	1	1	1	No	No	1	0	0	0	0	0	0	0	0	0	0	0	0	0	1	3	3	1	#NULL!	#NULL!	#NULL!	#NULL!	#NULL!	#NULL!	#NULL!	#NULL!	#NULL!	#NULL!	#NULL!
32	2021-01-29 16:04:56	2021-01-29 16:12:43	00:07:46.992000	2	2	3	1	5	Catalunya	2	3	4	4	3	2	2	1	1	No	No	0	0	0	0	0	0	0	1	0	0	19	7	19	45	1	3	2	2	1	4	1	0	0	1	6	2	3	1	0
33	2021-01-29 16:19:15	2021-01-29 16:25:02	00:05:46.032000	1	2	2	1	5	Catalunya	1	3	2	2	4	2	2	1	1	No	No	0	0	0	1	0	2	2	1	2	0	28	12	40	80	2	1	1	3	3	5	5	4	0	1	6	4	6	5	4
35	2021-01-29 16:21:57	2021-01-29 16:29:09	00:07:10.963000	2	2	1	1	5	Catalunya	1	13	4	4	1	1	1	1	1	No	No	1	0	0	0	0	0	0	0	0	0	14	0	37	51	2	3	3	2	3	1	1	6	0	2	4	0	4	0	0
36	2021-01-29 16:18:02	2021-01-29 16:29:53	00:11:50.035000	1	2	3	1	5	Catalunya	1	4	4	4	4	1	1	1	1	No	No	0	0	0	0	1	1	0	0	0	0	27	2	37	66	2	1	3	2	5	5	4	6	0	1	5	1	6	1	1
37	2021-01-29 16:27:12	2021-01-29 16:31:39	00:04:26.976000	1	1	3	1	5	Catalunya	1	4	4	4	4	1	1	1	1	No	No	1	0	0	0	0	0	0	0	0	0	18	1	48	67	3	3	3	3	0	4	1	6	0	1	6	1	6	1	0
38	2021-01-29 16:28:18	2021-01-29 16:33:32	00:05:13.027000	2	1	4	1	5	Catalunya	2	2	7	7	4	2	2	4	2	No	No	0	0	0	0	0	0	1	0	0	0	33	16	26	75	1	1	1	3	4	4	4	4	4	4	4	5	2	4	4
40	2021-01-29 16:32:57	2021-01-29 16:37:15	00:04:17.040000	2	1	1	1	5	Catalunya	2	13	4	4	1	1	1	4	2	Sí, por primera vez en mi vida	No	1	0	0	0	0	0	0	0	0	0	4	9	48	61	3	3	2	2	0	1	2	6	0	1	6	0	6	6	3
41	2021-01-29 16:30:06	2021-01-29 16:39:52	00:09:45.014000	1	2	4	1	5	Catalunya	2	7	7	7	4	1	1	1	1	No	No	0	0	2	0	0	0	2	0	0	0	18	8	37	63	2	3	2	2	3	3	1	4	0	1	5	3	5	5	2
42	2021-01-29 16:35:29	2021-01-29 16:39:52	00:04:23.002000	1	1	3	1	5	Catalunya	2	7	7	7	4	2	2	1	1	No	No	1	0	0	0	0	0	0	0	0	0	31	16	24	71	1	1	1	3	3	6	3	4	3	2	3	6	3	5	5
43	2021-01-29 16:37:41	2021-01-29 16:41:59	00:04:17.990000	1	2	1	1	5	Catalunya	2	7	7	7	1	2	2	2	1	No	Sí, por confinamiento por contacto estrecho o sospecha de COVID-19	1	0	0	0	0	0	0	0	0	0	26	13	34	73	2	2	1	3	3	4	3	6	4	1	4	3	2	3	2
44	2021-01-29 16:43:07	2021-01-29 16:47:11	00:04:03.043000	1	1	3	1	5	Catalunya	2	7	7	7	4	1	1	1	1	No	No	1	0	0	0	0	0	0	0	0	0	49	16	31	96	2	1	1	3	5	6	5	6	0	5	5	6	5	5	6
45	2021-01-29 16:43:42	2021-01-29 16:47:42	00:04:00.970000	1	1	1	1	5	Catalunya	2	6	4	4	1	2	2	1	1	No	No	0	2	0	0	0	0	2	0	2	0	11	11	40	62	2	3	1	2	1	1	1	6	0	3	6	2	6	6	5
46	2021-01-29 14:29:58	2021-01-29 16:54:11	02:24:12.960000	1	2	4	1	5	Catalunya	1	3	1	14	3	1	1	3	2	No	Sí, por problemas de salud físicos	1	0	0	0	0	0	0	0	0	0	0	6	44	50	3	3	2	2	0	0	0	6	0	0	6	0	2	0	6
47	2021-01-29 16:46:31	2021-01-29 16:54:24	00:07:53.040000	1	1	1	1	5	Catalunya	2	7	7	7	1	2	2	3	2	No	Sí, por problemas de salud físicos	1	0	0	0	0	0	0	0	0	0	25	17	38	80	2	2	1	3	2	5	3	6	5	1	3	4	6	3	3
48	2021-01-29 16:48:47	2021-01-29 16:57:24	00:08:37.018000	1	1	4	1	5	Catalunya	1	3	7	7	4	2	2	3	2	No	Sí, por problemas de salud físicos	0	4	4	4	4	4	4	0	4	4	16	5	42	63	3	3	3	2	1	5	1	6	0	1	6	1	6	0	1
49	2021-01-29 16:58:25	2021-01-29 17:03:21	00:04:56.006000	1	1	1	1	5	Catalunya	2	7	7	7	1	2	2	1	1	No	No	1	0	0	0	0	0	0	0	0	0	26	17	35	78	2	2	1	3	4	4	3	6	3	1	5	4	6	5	2
50	2021-01-29 17:03:23	2021-01-29 17:09:27	00:06:04.003000	2	1	2	1	5	Catalunya	1	1	4	4	3	2	2	1	1	No	No	1	0	0	0	0	0	0	0	0	0	20	7	27	54	1	2	2	2	1	4	1	6	3	4	1	1	4	2	2
51	2021-01-29 17:04:55	2021-01-29 17:12:45	00:07:50.016000	1	2	2	1	5	Catalunya	2	7	7	7	3	2	2	1	1	No	No	1	0	0	0	0	0	0	0	0	0	49	29	29	107	1	1	1	3	4	6	4	6	6	6	4	6	5	6	6
53	2021-01-29 16:58:51	2021-01-29 17:15:33	00:16:41.981000	1	1	5	1	5	Catalunya	2	3	7	7	4	2	2	3	2	No	Sí, por problemas de salud físicos	0	4	0	4	1	4	0	0	0	0	33	19	47	99	3	1	1	3	5	6	2	6	1	4	6	6	6	6	6
54	2021-01-29 17:06:54	2021-01-29 17:18:13	00:11:19.018000	2	1	4	1	5	Catalunya	1	17	13	14	4	1	1	1	1	No	No	0	2	0	0	1	1	2	1	0	2	53	13	23	89	1	1	1	3	6	6	6	6	0	6	6	6	5	6	5
55	2021-01-29 17:17:14	2021-01-29 17:23:16	00:06:02.016000	2	1	5	1	5	Catalunya	2	3	4	4	4	1	1	1	1	No	No	0	0	0	2	0	0	0	1	0	2	5	4	37	46	2	3	3	2	0	1	1	1	1	1	1	1	6	1	1
56	2021-01-29 17:22:17	2021-01-29 17:25:30	00:03:11.981000	1	2	4	1	5	Catalunya	2	7	7	7	4	2	2	1	1	No	No	1	0	0	0	0	0	0	0	0	0	26	5	32	63	2	2	3	2	3	4	1	6	0	3	6	3	6	1	1
57	2021-01-29 17:22:50	2021-01-29 17:29:08	00:06:19.037000	1	2	4	1	5	Catalunya	1	4	4	4	4	1	1	2	1	No	Sí, por confinamiento por contacto estrecho o sospecha de COVID-19	1	0	0	0	0	0	0	0	0	0	2	0	46	48	3	3	3	2	0	1	1	6	0	0	4	0	6	0	0
59	2021-01-29 17:35:07	2021-01-29 17:38:50	00:03:42.998000	2	1	4	1	5	Catalunya	2	2	7	7	4	2	2	1	1	Sí, anteriormente estaba sin actividad laboral	No	1	0	0	0	0	0	0	0	0	0	2	0	48	50	3	3	3	2	0	0	0	6	0	0	6	0	6	0	0
60	2021-01-29 17:34:42	2021-01-29 17:39:09	00:04:26.026000	1	2	1	1	5	Catalunya	2	7	2	2	1	1	1	1	1	No	No	1	0	0	0	0	0	0	0	0	0	3	4	46	53	3	3	3	2	0	1	1	6	0	0	5	0	6	1	2
61	2021-01-29 17:33:40	2021-01-29 17:39:42	00:06:02.966000	1	2	1	1	5	Catalunya	2	7	4	4	1	2	2	1	1	No	No	0	0	0	0	0	1	0	0	0	0	36	4	29	69	1	1	3	3	2	5	4	6	3	3	5	6	5	0	1
63	2021-01-29 17:55:57	2021-01-29 18:00:06	00:04:09.005000	1	2	1	1	5	Catalunya	2	7	7	7	1	2	2	3	2	No	Sí, por confinamiento por contacto estrecho o sospecha de COVID-19	0	2	2	4	4	4	4	0	4	0	31	22	29	82	1	1	1	3	4	6	5	6	6	1	5	6	4	5	6
64	2021-01-29 17:54:15	2021-01-29 18:00:33	00:06:18	2	1	1	1	5	Catalunya	2	17	13	14	1	1	1	1	1	No	No	0	0	0	0	0	0	2	0	0	0	34	21	23	78	1	1	1	3	3	5	5	6	6	3	0	2	0	5	1
65	2021-01-29 18:12:08	2021-01-29 18:21:01	00:08:51.965000	1	1	1	1	5	Catalunya	2	17	3	14	1	1	1	1	1	No	No	0	0	0	0	2	0	0	0	0	0	21	10	37	68	2	2	1	3	1	3	3	4	0	2	4	3	6	5	3
67	2021-01-29 18:37:18	2021-01-29 18:43:43	00:06:23.962000	1	1	1	1	5	Catalunya	2	6	4	4	1	2	2	3	2	No	No	1	0	0	0	0	0	0	0	0	0	29	15	30	74	1	1	1	3	2	5	5	3	3	0	5	5	5	5	6
69	2021-01-29 18:59:29	2021-01-29 19:03:01	00:03:32.026000	1	1	3	1	5	Catalunya	1	4	4	4	4	2	2	1	1	No	No	1	0	0	0	0	0	0	0	0	0	7	17	42	66	3	3	1	2	1	0	1	6	0	0	0	1	6	6	0
70	2021-01-29 19:08:18	2021-01-29 19:13:46	00:05:27.974000	2	2	1	1	5	Catalunya	2	7	2	2	2	2	2	1	1	No	Sí, por problemas de salud psíquicos	0	2	0	0	0	0	1	1	0	2	25	9	30	64	1	2	2	2	2	5	3	4	0	1	4	4	4	4	5
71	2021-01-29 19:21:22	2021-01-29 19:25:35	00:04:12.979000	1	1	3	1	5	Catalunya	2	7	2	2	4	2	2	1	1	No	No	1	0	0	0	0	0	0	0	0	0	33	18	38	89	2	1	1	3	5	6	5	6	3	0	5	6	6	5	5
72	2021-01-29 19:17:25	2021-01-29 19:26:22	00:08:56.976000	2	1	1	1	5	Catalunya	1	13	4	4	2	1	1	1	1	No	No	0	0	0	0	1	0	0	0	0	0	19	6	44	69	3	3	2	3	1	3	2	6	0	1	6	3	6	2	1
73	2021-01-29 19:27:28	2021-01-29 19:32:05	00:04:36.998000	2	2	2	1	5	Catalunya	1	4	8	14	4	1	1	1	1	No	No	1	0	0	0	0	0	0	0	0	0	20	2	47	69	3	2	3	3	0	6	5	6	0	0	6	1	6	0	2
74	2021-01-29 19:31:25	2021-01-29 19:34:00	00:02:35.002000	2	2	1	1	5	Catalunya	1	4	13	14	2	2	2	1	1	No	No	0	2	0	0	0	0	1	0	0	0	46	22	39	107	2	1	1	3	2	6	5	4	5	6	6	6	6	6	6
75	2021-01-29 19:33:30	2021-01-29 19:38:19	00:04:49.958000	1	1	2	1	5	Catalunya	2	6	7	7	2	1	1	1	1	No	No	1	0	0	0	0	0	0	0	0	0	15	15	41	71	3	3	1	3	1	1	1	6	1	1	6	1	6	6	6
76	2021-01-29 19:32:38	2021-01-29 19:39:10	00:06:33.034000	2	1	3	1	5	Catalunya	1	4	7	7	4	1	1	1	1	No	No	1	0	0	0	0	0	0	0	0	0	15	15	40	70	2	3	1	3	1	2	1	6	1	2	6	2	5	6	5
77	2021-01-29 19:33:25	2021-01-29 19:42:32	00:09:06.998000	1	2	2	1	5	Catalunya	2	7	2	2	3	2	2	1	1	No	Sí, por confinamiento por contacto estrecho o sospecha de COVID-19	0	2	2	2	2	2	2	1	0	0	44	21	30	95	1	1	1	3	3	6	5	6	6	5	3	6	6	6	6
78	2021-01-29 19:50:03	2021-01-29 19:52:10	00:02:05.971000	2	1	1	1	5	Catalunya	1	3	4	4	1	2	2	1	1	No	No	1	0	0	0	0	0	0	0	0	0	0	0	0	0	1	3	3	1	#NULL!	#NULL!	#NULL!	#NULL!	#NULL!	#NULL!	#NULL!	#NULL!	#NULL!	#NULL!	#NULL!
79	2021-01-29 19:50:40	2021-01-29 19:55:57	00:05:15.965000	1	1	4	1	5	Catalunya	2	7	7	7	4	2	2	3	2	No	Sí, por confinamiento por contacto estrecho o sospecha de COVID-19	1	0	0	0	0	0	0	0	0	0	28	2	34	64	2	1	3	2	4	4	4	4	0	1	6	4	6	1	1
80	2021-01-29 19:46:03	2021-01-29 19:56:30	00:10:27.005000	2	1	3	1	5	Catalunya	1	4	4	4	3	1	1	1	1	No	No	1	0	0	0	0	0	0	0	0	0	11	8	39	58	2	3	2	2	1	3	1	6	0	1	5	1	6	1	6
81	2021-01-29 19:49:58	2021-01-29 19:58:27	00:08:28.032000	2	2	4	1	5	Catalunya	2	9	2	2	4	1	1	1	1	No	No	0	2	2	0	2	0	2	0	0	0	15	3	47	65	3	3	3	2	1	3	1	6	0	1	6	0	6	1	1
84	2021-01-29 19:44:13	2021-01-29 20:06:36	00:22:24.038000	2	1	2	1	5	Catalunya	2	6	2	2	3	2	2	1	1	No	No	1	0	0	0	0	0	0	0	0	0	4	4	31	39	2	3	3	2	0	1	0	0	0	0	0	0	6	1	1
86	2021-01-29 20:01:47	2021-01-29 20:08:31	00:06:44.006000	1	2	4	1	5	Catalunya	1	4	7	7	4	1	1	1	1	No	No	1	0	0	0	0	0	0	0	0	0	42	7	46	95	3	1	2	3	3	6	3	6	1	6	6	6	6	1	1
88	2021-01-29 20:09:01	2021-01-29 20:21:37	00:12:34.963000	1	1	1	1	5	Catalunya	1	3	4	4	1	2	2	1	1	Sí, por primera vez en mi vida	No	1	0	0	0	0	0	0	0	0	0	16	14	41	71	3	3	1	3	3	3	1	6	0	0	6	2	6	6	3
89	2021-01-29 20:20:39	2021-01-29 20:25:18	00:04:40.022000	2	2	1	1	5	Catalunya	1	1	4	4	2	1	1	1	1	Sí, anteriormente estaba sin actividad laboral	No	1	0	0	0	0	0	0	0	0	0	13	0	45	58	3	3	3	2	2	2	2	6	0	1	6	0	6	0	0
94	2021-01-29 20:52:51	2021-01-29 20:57:14	00:04:24.038000	2	2	1	1	5	Catalunya	1	1	4	4	1	1	1	2	1	No	Sí, por confinamiento por contacto estrecho o sospecha de COVID-19	0	0	0	0	0	0	0	0	2	0	3	2	44	49	3	3	3	2	0	1	0	6	0	0	5	0	6	2	0
95	2021-01-29 20:59:02	2021-01-29 21:03:04	00:04:00.970000	2	2	1	1	5	Catalunya	2	8	7	7	1	1	1	3	2	No	No	1	0	0	0	0	0	0	0	0	0	8	20	29	57	1	3	1	2	1	0	1	4	4	1	1	1	2	3	3
97	2021-01-29 21:02:15	2021-01-29 21:08:28	00:06:12.038000	2	2	1	1	5	Catalunya	1	4	4	4	2	1	1	1	1	No	No	1	0	0	0	0	0	0	0	0	0	11	6	47	64	3	3	2	2	1	1	1	6	0	0	6	1	6	1	0
98	2021-01-29 21:12:02	2021-01-29 21:21:25	00:09:22.982000	1	1	1	1	5	Catalunya	1	4	4	4	1	1	1	4	2	Sí, por primera vez en mi vida	No	0	0	0	0	0	0	2	0	0	0	29	7	29	65	1	1	2	2	2	5	4	6	0	4	6	4	3	3	0
99	2021-01-29 21:20:45	2021-01-29 21:27:17	00:06:31.997000	1	2	4	1	5	Catalunya	1	17	2	2	4	1	1	1	1	No	No	1	0	0	0	0	0	0	0	0	0	28	5	41	74	3	1	3	3	2	5	6	6	1	0	6	2	6	0	0
100	2021-01-29 21:22:38	2021-01-29 21:28:49	00:06:09.965000	2	2	1	1	5	Catalunya	2	6	7	7	2	2	2	2	1	No	Sí, por confinamiento por contacto estrecho o sospecha de COVID-19	0	2	2	0	0	2	2	0	0	0	42	17	26	85	1	1	1	3	5	6	5	4	4	2	2	6	4	2	5
101	2021-01-29 21:24:05	2021-01-29 21:29:15	00:05:11.040000	1	2	1	1	5	Catalunya	2	7	2	2	3	2	2	2	1	No	Sí, por problemas de salud físicos	1	0	0	0	0	0	0	0	0	0	21	8	33	62	2	2	2	2	2	4	1	6	3	1	1	3	5	3	1
102	2021-01-29 21:18:36	2021-01-29 21:32:17	00:13:40.973000	1	2	3	1	5	Catalunya	2	6	2	2	4	1	1	3	2	No	Sí, por problemas de salud físicos	1	0	0	0	0	0	0	0	0	0	23	2	34	59	2	2	3	2	1	6	3	6	0	1	6	3	6	1	1
103	2021-01-29 21:36:17	2021-01-29 21:48:32	00:12:13.968000	1	2	2	1	5	Catalunya	1	3	1	14	4	2	2	3	2	No	No	0	4	0	4	0	4	4	0	0	0	34	13	31	78	2	1	1	3	5	6	6	6	5	2	5	5	3	6	1
105	2021-01-29 21:53:00	2021-01-29 21:59:34	00:06:33.984000	2	2	2	1	5	Catalunya	2	6	4	4	4	1	1	3	2	No	Sí, por confinamiento por contacto estrecho o sospecha de COVID-19	0	3	0	0	0	0	0	0	0	0	30	8	39	77	2	1	2	3	1	4	3	6	1	1	6	5	5	3	3
106	2021-01-29 21:58:56	2021-01-29 22:02:58	00:04:02.957000	2	2	1	1	5	Catalunya	2	17	3	14	1	1	1	3	2	Sí, por primera vez en mi vida	No	1	0	0	0	0	0	0	0	0	0	28	3	31	62	2	1	3	2	0	6	6	6	3	5	0	5	5	0	0
107	2021-01-29 21:47:52	2021-01-29 22:03:20	00:15:28.973000	1	2	4	1	5	Catalunya	2	8	2	2	4	1	1	3	2	No	No	0	4	0	0	4	4	4	0	0	4	17	6	33	56	2	3	2	2	0	5	1	4	0	3	5	1	6	1	1
109	2021-01-29 22:01:52	2021-01-29 22:07:12	00:05:20.976000	2	2	1	1	5	Catalunya	2	2	7	7	1	2	2	3	2	No	Sí, por problemas de salud físicos	0	4	4	4	4	4	4	4	4	0	22	0	40	62	2	2	3	2	2	6	6	6	0	0	6	1	6	0	0
110	2021-01-29 20:19:07	2021-01-29 22:09:09	01:50:03.034000	2	2	2	1	5	Catalunya	2	7	7	7	3	1	1	1	1	No	No	1	0	0	0	0	0	0	0	0	0	23	11	36	70	2	2	1	3	2	2	2	6	1	3	4	4	4	4	4
111	2021-01-29 22:03:31	2021-01-29 22:09:40	00:06:07.978000	1	2	1	1	5	Catalunya	2	6	7	7	1	2	2	1	1	Sí, por primera vez en mi vida	Sí, por problemas de salud psíquicos	0	0	0	2	0	0	0	0	0	0	34	14	32	80	2	1	1	3	3	4	4	6	4	4	5	3	4	3	1
115	2021-01-29 23:43:06	2021-01-29 23:45:23	00:02:17.030000	1	2	3	1	5	Catalunya	1	3	13	14	4	2	2	3	2	No	No	1	0	0	0	0	0	0	0	0	0	0	0	0	0	1	3	3	1	#NULL!	#NULL!	#NULL!	#NULL!	#NULL!	#NULL!	#NULL!	#NULL!	#NULL!	#NULL!	#NULL!
117	2021-01-30 00:06:12	2021-01-30 00:11:07	00:04:54.970000	1	2	2	1	5	Catalunya	1	4	4	4	3	1	1	1	1	Sí, anteriormente estaba sin actividad laboral	No	1	0	0	0	0	0	0	0	0	0	3	1	48	52	3	3	3	2	0	1	0	6	0	0	6	1	6	1	0
119	2021-01-30 00:09:59	2021-01-30 00:18:27	00:08:26.995000	2	2	3	1	5	Catalunya	1	6	4	4	4	2	2	2	1	No	Sí, por confinamiento por contacto estrecho o sospecha de COVID-19	0	0	0	0	0	0	0	1	0	0	16	10	37	63	2	3	1	2	1	5	2	4	2	2	5	1	5	3	3
126	2021-01-30 07:40:07	2021-01-30 07:46:01	00:05:53.981000	1	2	1	1	5	Catalunya	1	4	4	4	3	1	1	1	1	No	No	0	2	2	0	2	2	2	0	0	0	51	21	38	110	2	1	1	3	5	6	6	6	5	6	6	6	6	6	5
128	2021-01-30 08:04:22	2021-01-30 08:17:45	00:13:24.038000	1	2	3	1	5	Catalunya	2	9	1	14	4	1	1	3	2	No	Sí, por problemas de salud psíquicos	0	0	0	0	1	1	4	1	4	0	11	12	20	43	1	3	1	2	1	1	1	4	1	3	5	1	1	5	4
129	2021-01-30 09:40:07	2021-01-30 09:46:39	00:06:30.960000	1	1	3	1	5	Catalunya	1	4	4	4	4	1	1	1	1	No	No	0	0	4	4	0	1	0	0	0	0	43	12	34	89	2	1	1	3	6	6	5	6	6	2	6	6	6	0	4
130	2021-01-30 09:44:56	2021-01-30 09:51:14	00:06:18	1	1	2	1	5	Catalunya	1	4	4	4	2	1	1	1	1	No	No	0	0	1	0	0	1	0	1	0	1	45	12	45	102	3	1	1	3	3	6	3	6	0	5	6	6	6	5	5
131	2021-01-30 09:45:59	2021-01-30 09:53:12	00:07:13.987000	1	1	2	1	5	Catalunya	1	3	4	4	1	1	1	2	1	No	Sí, por confinamiento por contacto estrecho o sospecha de COVID-19	0	0	0	0	0	1	1	0	1	0	22	6	33	61	2	2	2	2	4	2	1	6	0	2	4	3	4	3	1
132	2021-01-30 09:49:05	2021-01-30 09:54:26	00:05:20.976000	2	1	1	1	5	Catalunya	1	4	4	4	1	1	1	1	1	No	No	1	0	0	0	0	0	0	0	0	0	5	3	48	56	3	3	3	2	0	2	1	6	0	0	6	0	6	0	1
134	2021-01-30 10:04:32	2021-01-30 10:09:07	00:04:33.974000	1	2	1	1	5	Catalunya	1	3	11	14	3	2	2	1	1	No	No	0	2	0	0	0	0	2	1	0	0	36	20	42	98	3	1	1	3	0	6	3	4	3	6	5	6	6	6	5
137	2021-01-30 09:51:05	2021-01-30 10:15:25	00:24:21.024000	2	2	2	1	5	Catalunya	1	3	4	4	3	2	2	3	2	No	No	0	4	0	0	4	1	4	4	1	4	11	5	27	43	1	3	3	2	1	2	0	6	0	1	2	2	6	3	1
139	2021-01-30 10:21:12	2021-01-30 10:29:06	00:07:53.990000	2	1	3	1	5	Catalunya	2	2	7	7	4	2	2	2	1	No	Sí, por confinamiento por contacto estrecho o sospecha de COVID-19	1	0	0	0	0	0	0	0	0	0	26	8	33	67	2	2	2	3	3	3	4	6	1	1	3	3	5	1	5
140	2021-01-30 10:22:07	2021-01-30 10:36:52	00:14:44.995000	2	1	4	1	5	Catalunya	1	4	9	14	4	2	2	2	1	No	No	0	0	0	0	2	2	2	1	2	0	21	3	35	59	2	2	3	2	1	4	1	4	0	3	3	2	5	1	1
141	2021-01-30 10:40:04	2021-01-30 10:47:26	00:07:22.022000	1	1	3	1	5	Catalunya	1	4	7	7	4	1	1	1	1	No	No	1	0	0	0	0	0	0	0	0	0	5	0	36	41	2	3	3	2	0	2	0	6	0	0	0	0	6	0	0
145	2021-01-30 10:44:15	2021-01-30 10:52:12	00:07:57.014000	1	2	3	1	5	Catalunya	2	17	7	7	3	1	1	1	1	No	No	1	0	0	0	0	0	0	0	0	0	25	2	29	56	1	2	3	2	4	4	4	6	0	1	6	4	3	1	0
146	2021-01-30 10:48:57	2021-01-30 10:54:23	00:05:25.987000	1	2	1	1	5	Catalunya	2	2	2	2	2	2	2	1	1	No	Sí, por problemas de salud psíquicos	0	0	0	0	1	1	0	0	0	0	12	6	38	56	2	3	2	2	1	3	1	6	1	1	6	2	5	2	1
147	2021-01-30 10:49:51	2021-01-30 10:55:46	00:05:55.968000	2	2	3	1	5	Catalunya	2	2	7	7	4	1	1	3	2	No	Sí, por confinamiento por contacto estrecho o sospecha de COVID-19	0	0	0	4	0	0	0	0	0	0	29	10	39	78	2	1	1	3	4	6	4	2	1	2	2	4	6	2	4
148	2021-01-30 10:53:13	2021-01-30 11:01:47	00:08:33.994000	1	1	3	1	5	Catalunya	1	3	7	7	4	2	2	3	2	No	Sí, por problemas de salud físicos	0	0	0	0	0	0	0	0	4	0	35	13	33	81	2	1	1	3	3	5	4	4	3	4	3	3	5	5	3
149	2021-01-30 10:56:37	2021-01-30 11:02:18	00:05:41.021000	1	1	3	1	5	Catalunya	2	2	7	7	3	2	2	2	1	No	Sí, por confinamiento por contacto estrecho o sospecha de COVID-19	0	0	2	0	0	2	2	0	0	0	52	24	25	101	1	1	1	3	5	6	6	4	6	6	5	6	4	5	5
150	2021-01-30 11:07:53	2021-01-30 11:16:28	00:08:35.030000	1	2	1	1	5	Catalunya	2	2	2	2	2	2	2	2	1	No	Sí, por confinamiento por contacto estrecho o sospecha de COVID-19	0	0	0	0	0	0	0	1	0	0	20	11	40	71	2	2	1	3	0	5	2	6	0	1	5	1	5	2	4
151	2021-01-30 11:07:02	2021-01-30 11:20:13	00:13:10.042000	2	2	3	1	5	Catalunya	2	10	4	4	4	1	1	1	1	No	No	0	0	0	0	0	1	2	1	0	0	38	16	39	93	2	1	1	3	3	4	5	6	3	5	6	5	5	5	4
152	2021-01-30 11:15:52	2021-01-30 11:21:00	00:05:08.966000	1	2	2	1	5	Catalunya	2	2	2	2	3	2	2	1	1	No	No	1	0	0	0	0	0	0	0	0	0	18	10	38	66	2	3	1	2	0	2	1	6	0	2	3	2	6	5	0
154	2021-01-30 11:08:14	2021-01-30 11:25:30	00:17:16.022000	1	2	2	1	5	Catalunya	1	3	4	4	3	2	2	3	2	No	Sí, por problemas de salud físicos	1	0	0	0	0	0	0	0	0	0	30	12	41	83	3	1	1	3	4	3	3	6	4	3	3	4	6	3	3
155	2021-01-30 11:21:04	2021-01-30 11:26:03	00:04:59.981000	1	2	3	1	5	Catalunya	2	2	7	7	3	3	1	1	1	No	Sí, por problemas de salud psíquicos	0	0	0	0	0	2	0	0	0	0	46	25	32	103	2	1	1	3	6	6	5	4	5	5	4	5	5	6	6
156	2021-01-30 11:23:42	2021-01-30 11:28:03	00:04:21.014000	1	2	3	1	5	Catalunya	2	2	7	7	3	2	2	1	1	No	No	0	2	2	2	2	2	2	1	0	0	53	27	30	110	1	1	1	3	6	6	5	4	5	6	5	6	5	6	6
157	2021-01-30 11:17:01	2021-01-30 11:29:36	00:12:34.963000	2	2	1	1	5	Catalunya	2	2	2	2	2	2	2	3	2	No	Sí, por confinamiento por contacto estrecho o sospecha de COVID-19	1	0	0	0	0	0	0	0	0	0	44	6	45	95	3	1	2	3	5	5	6	6	0	5	6	6	6	1	3
158	2021-01-30 11:24:05	2021-01-30 11:30:02	00:05:55.968000	1	1	4	1	5	Catalunya	2	2	13	14	4	2	2	1	1	No	No	1	0	0	0	0	0	0	0	0	0	36	18	27	81	1	1	1	3	2	5	3	4	5	5	3	5	3	5	5
160	2021-01-30 11:36:58	2021-01-30 11:43:37	00:06:37.958000	1	2	3	1	5	Catalunya	2	2	7	7	4	2	2	1	1	Sí, anteriormente estaba sin actividad laboral	No	1	0	0	0	0	0	0	0	0	0	24	0	35	59	2	2	3	2	0	6	0	6	0	0	0	6	6	0	0
161	2021-01-30 11:48:18	2021-01-30 11:54:34	00:06:16.013000	1	2	2	1	5	Catalunya	2	3	7	7	1	2	2	3	2	No	No	0	0	0	0	0	0	4	0	0	4	47	8	42	97	3	1	2	3	3	6	6	6	4	5	6	6	6	0	1
162	2021-01-30 11:53:28	2021-01-30 11:56:44	00:03:16.992000	1	2	2	1	5	Catalunya	2	2	7	7	3	2	2	1	1	No	No	0	0	0	0	0	0	2	0	0	0	47	19	46	112	3	1	1	3	3	5	5	6	0	6	5	6	6	6	6
163	2021-01-30 11:50:09	2021-01-30 11:57:31	00:07:22.973000	1	2	3	1	5	Catalunya	2	1	7	7	4	1	1	1	1	No	No	1	0	0	0	0	0	0	0	0	0	17	3	46	66	3	3	3	2	3	4	1	4	0	0	6	1	6	1	1
165	2021-01-30 11:48:44	2021-01-30 12:00:22	00:11:38.026000	1	2	4	1	5	Catalunya	1	7	4	4	4	2	2	1	1	No	No	0	0	2	0	2	0	2	1	1	0	22	3	30	55	1	2	3	2	0	6	1	6	1	1	5	6	5	1	0
168	2021-01-30 11:58:01	2021-01-30 12:04:38	00:06:37.008000	2	1	4	1	5	Catalunya	2	3	7	7	4	1	1	1	1	No	No	1	0	0	0	0	0	0	0	0	0	17	8	42	67	3	3	2	3	2	3	1	6	3	0	6	3	6	2	2
170	2021-01-30 12:03:13	2021-01-30 12:11:00	00:07:46.992000	2	2	4	1	5	Catalunya	2	2	2	2	4	3	1	1	1	No	No	0	0	0	0	0	1	0	0	0	0	22	2	41	65	3	2	3	2	2	4	1	6	1	1	6	4	6	0	0
171	2021-01-30 12:09:05	2021-01-30 12:17:21	00:08:16.973000	2	2	4	1	5	Catalunya	2	3	7	7	4	2	2	1	1	No	No	1	0	0	0	0	0	0	0	0	0	42	10	35	87	2	1	1	3	5	6	5	6	0	4	5	5	5	5	5
172	2021-01-30 12:18:36	2021-01-30 12:25:27	00:06:49.968000	1	2	1	1	5	Catalunya	2	7	2	2	2	2	2	2	1	No	Sí, por confinamiento por contacto estrecho o sospecha de COVID-19	0	2	0	0	0	0	0	0	0	0	37	10	28	75	1	1	1	3	4	5	5	4	2	3	3	5	3	3	5
173	2021-01-30 12:18:47	2021-01-30 12:26:56	00:08:09.974000	1	2	3	1	5	Catalunya	2	1	4	4	4	2	2	1	1	No	No	1	0	0	0	0	0	0	0	0	0	9	2	48	59	3	3	3	2	0	3	3	6	0	0	6	0	6	1	1
174	2021-01-30 12:24:30	2021-01-30 12:28:51	00:04:21.014000	1	2	2	1	5	Catalunya	2	2	7	7	3	2	2	1	1	No	No	0	0	0	0	0	0	2	0	0	0	53	24	31	108	2	1	1	3	6	6	6	4	5	6	4	6	5	6	6
175	2021-01-30 12:28:16	2021-01-30 12:36:59	00:08:42.029000	1	2	3	1	5	Catalunya	2	10	7	7	3	2	2	2	1	No	Sí, por confinamiento por contacto estrecho o sospecha de COVID-19	0	0	0	0	1	0	0	0	1	1	10	5	31	46	2	3	3	2	1	1	1	2	1	1	1	2	5	1	1
176	2021-01-30 12:33:40	2021-01-30 12:39:48	00:06:07.978000	2	2	3	1	5	Catalunya	2	8	7	7	4	2	2	3	2	No	Sí, por confinamiento por contacto estrecho o sospecha de COVID-19	0	0	0	0	0	2	0	0	1	0	45	18	29	92	1	1	1	3	5	5	5	6	1	5	5	6	3	5	5
177	2021-01-30 12:41:34	2021-01-30 12:52:20	00:10:44.976000	1	2	3	1	5	Catalunya	2	2	2	2	4	2	2	3	2	No	Sí, por problemas de salud físicos	0	4	2	4	0	2	1	0	0	0	17	8	43	68	3	3	2	3	1	2	1	6	1	3	3	2	6	5	1
178	2021-01-30 12:48:16	2021-01-30 13:01:10	00:12:53.971000	1	2	4	1	5	Catalunya	1	3	9	14	4	1	1	2	1	No	Sí, por confinamiento por contacto estrecho o sospecha de COVID-19	1	0	0	0	0	0	0	0	0	0	24	2	36	62	2	2	3	2	1	4	1	6	0	4	6	1	6	1	1
179	2021-01-30 13:02:32	2021-01-30 13:15:11	00:12:39.974000	1	2	3	1	5	Catalunya	1	6	2	2	4	2	2	2	1	No	No	0	0	0	0	2	0	2	0	2	0	22	16	32	70	2	2	1	3	1	4	2	6	5	5	5	3	3	5	3
180	2021-01-30 13:07:57	2021-01-30 13:22:25	00:14:27.024000	1	2	4	1	5	Catalunya	1	12	9	14	4	1	1	2	1	No	No	0	0	0	0	2	2	0	0	0	0	10	5	28	43	1	3	3	2	4	2	2	6	3	0	6	1	6	1	1
181	2021-01-30 13:43:26	2021-01-30 13:50:48	00:07:22.973000	2	2	3	1	5	Catalunya	2	2	7	7	4	2	2	1	1	No	No	1	0	0	0	0	0	0	0	0	0	42	18	40	100	2	1	1	3	1	6	5	4	6	6	5	6	5	6	5
182	2021-01-30 11:21:24	2021-01-30 13:56:28	02:35:03.984000	2	2	1	1	5	Catalunya	2	2	13	14	1	1	1	1	1	No	Sí, por problemas de salud psíquicos	0	2	0	0	0	0	1	1	0	2	40	22	44	106	3	1	1	3	3	6	4	6	4	5	6	5	5	4	5
183	2021-01-30 13:51:39	2021-01-30 13:57:31	00:05:53.030000	1	2	1	1	5	Catalunya	2	2	11	14	1	2	2	1	1	No	No	0	2	0	0	0	0	0	0	0	0	37	9	39	85	2	1	2	3	5	6	5	6	0	4	6	4	5	4	4
185	2021-01-30 13:58:09	2021-01-30 14:02:36	00:04:26.976000	2	2	1	1	5	Catalunya	2	3	9	14	2	2	2	3	2	No	Sí, por confinamiento por contacto estrecho o sospecha de COVID-19	0	0	0	4	0	0	4	0	0	0	18	7	43	68	3	3	2	3	1	1	2	6	0	2	6	1	6	1	2
186	2021-01-30 14:04:01	2021-01-30 14:13:06	00:09:05.011000	1	2	3	1	5	Catalunya	2	2	4	4	4	1	1	2	1	No	Sí, por confinamiento por contacto estrecho o sospecha de COVID-19	1	0	0	0	0	0	0	0	0	0	13	3	32	48	2	3	3	2	1	5	1	4	0	2	1	2	5	2	0
187	2021-01-30 14:09:30	2021-01-30 14:14:21	00:04:49.958000	2	2	3	1	5	Catalunya	2	2	7	7	4	2	2	3	2	Sí, por primera vez en mi vida	Sí, por problemas de salud físicos	1	0	0	0	0	0	0	0	0	0	34	0	43	77	3	1	3	3	0	6	6	6	0	0	6	6	5	0	0
188	2021-01-30 14:04:36	2021-01-30 14:15:50	00:11:15.043000	2	2	3	1	5	Catalunya	2	2	2	2	3	2	2	3	2	No	Sí, por confinamiento por contacto estrecho o sospecha de COVID-19	0	0	0	0	4	4	0	0	0	0	25	7	43	75	3	2	2	3	1	5	3	6	0	2	6	4	6	4	1
189	2021-01-30 14:09:13	2021-01-30 14:17:00	00:07:48.029000	1	1	4	1	5	Catalunya	2	2	7	7	4	1	1	3	2	No	Sí, por problemas de salud físicos	0	4	4	4	4	4	4	0	0	0	46	4	35	85	2	1	3	3	5	6	6	6	0	5	6	6	1	0	1
190	2021-01-30 14:05:16	2021-01-30 14:21:05	00:15:49.018000	2	2	4	1	5	Catalunya	2	2	2	2	4	2	2	3	2	No	Sí, por confinamiento por contacto estrecho o sospecha de COVID-19	0	4	0	0	0	0	4	0	4	0	18	6	35	59	2	3	2	2	3	5	1	4	0	1	5	1	3	0	3
191	2021-01-30 14:50:58	2021-01-30 14:57:18	00:06:19.037000	1	2	3	1	5	Catalunya	1	2	4	4	4	2	2	1	1	No	No	1	0	0	0	0	0	0	0	0	0	13	2	39	54	2	3	3	2	1	5	1	6	0	0	1	1	6	1	1
192	2021-01-30 14:47:25	2021-01-30 14:59:35	00:12:09.043000	1	2	2	1	5	Catalunya	1	2	10	10	3	1	1	1	1	No	No	1	0	0	0	0	0	0	0	0	0	13	1	36	50	2	3	3	2	1	2	1	6	0	0	1	1	6	1	0
193	2021-01-30 15:03:15	2021-01-30 15:07:29	00:04:14.966000	2	2	1	1	5	Catalunya	2	17	10	10	2	2	2	1	1	No	No	0	0	0	0	2	0	2	0	0	0	42	9	37	88	2	1	2	3	3	4	4	6	3	6	6	6	6	0	0
194	2021-01-30 15:01:07	2021-01-30 15:09:31	00:08:23.021000	2	2	3	1	5	Catalunya	2	17	7	7	3	1	1	2	1	No	No	0	2	0	2	2	1	2	1	2	0	22	7	42	71	3	2	2	3	4	3	3	6	1	1	6	3	6	1	1
195	2021-01-30 15:07:41	2021-01-30 15:11:29	00:03:48.010000	2	2	1	1	5	Catalunya	2	17	10	10	2	1	1	1	1	No	No	0	0	0	0	0	0	2	0	0	0	26	12	37	75	2	2	1	3	3	5	5	4	2	1	6	3	6	5	4
196	2021-01-30 15:05:03	2021-01-30 15:11:47	00:06:44.006000	1	1	1	1	5	Catalunya	1	4	10	10	1	2	2	1	1	No	No	0	1	0	0	0	0	2	0	0	0	43	10	41	94	3	1	1	3	5	6	5	4	2	5	5	5	6	2	0
197	2021-01-30 15:11:07	2021-01-30 15:14:44	00:03:37.037000	1	2	2	1	5	Catalunya	2	10	10	10	3	1	1	1	1	No	No	1	0	0	0	0	0	0	0	0	0	7	0	41	48	3	3	3	2	0	1	2	4	0	0	6	1	6	0	0
198	2021-01-30 15:09:05	2021-01-30 15:15:49	00:06:45.043000	1	2	1	1	5	Catalunya	1	3	10	10	2	2	2	3	2	No	Sí, por confinamiento por contacto estrecho o sospecha de COVID-19	0	0	0	0	0	1	4	0	4	0	45	16	26	87	1	1	1	3	4	6	6	4	3	3	3	6	3	3	6
199	2021-01-30 15:11:47	2021-01-30 15:18:10	00:06:23.011000	1	2	4	1	5	Catalunya	2	6	2	2	4	2	2	1	1	No	No	1	0	0	0	0	0	0	0	0	0	40	23	36	99	2	1	1	3	4	6	5	6	6	3	6	6	6	6	6
201	2021-01-30 15:12:06	2021-01-30 15:19:56	00:07:50.966000	1	2	2	1	5	Catalunya	1	1	10	10	3	1	1	1	1	No	No	0	2	1	0	0	1	0	0	0	0	38	12	29	79	1	1	1	3	5	4	5	4	3	5	4	5	4	4	4
203	2021-01-30 15:14:08	2021-01-30 15:20:05	00:05:55.968000	1	1	3	1	5	Catalunya	2	6	7	7	4	2	2	3	2	No	Sí, por problemas de salud físicos	1	0	0	0	0	0	0	0	0	0	18	1	38	57	2	3	3	2	1	4	1	6	0	1	6	2	6	0	0
205	2021-01-30 15:05:32	2021-01-30 15:21:39	00:16:06.989000	1	2	4	1	5	Catalunya	2	2	12	14	4	1	1	1	1	No	No	0	0	0	0	0	0	2	1	0	2	19	13	46	78	3	3	1	3	3	3	3	6	3	3	6	3	6	3	1
206	2021-01-30 15:18:34	2021-01-30 15:27:20	00:08:46.003000	1	2	1	1	5	Catalunya	1	6	13	14	2	2	2	1	1	No	No	0	0	0	0	0	0	0	1	0	0	39	6	40	85	2	1	2	3	5	5	4	6	1	4	4	5	6	1	2
207	2021-01-30 15:22:42	2021-01-30 15:27:55	00:05:11.990000	1	2	3	1	5	Catalunya	2	3	10	10	4	2	2	1	1	No	No	1	0	0	0	0	0	0	0	0	0	38	9	31	78	2	1	2	3	5	6	5	6	0	5	5	6	6	4	4
208	2021-01-30 15:30:41	2021-01-30 15:39:51	00:09:10.022000	1	1	4	1	5	Catalunya	2	2	7	7	4	3	1	1	1	No	No	1	0	0	0	0	0	0	0	0	0	48	22	40	110	2	1	1	3	5	5	6	4	5	5	5	6	5	5	5
209	2021-01-30 15:43:45	2021-01-30 15:48:01	00:04:17.040000	1	2	2	1	5	Catalunya	2	3	10	10	3	2	2	1	1	No	No	0	0	0	0	0	0	2	0	0	0	21	4	33	58	2	2	3	2	3	3	2	6	1	1	3	3	3	1	2
210	2021-01-30 15:41:32	2021-01-30 15:48:15	00:06:42.019000	2	2	2	1	5	Catalunya	2	2	7	7	2	2	2	3	2	No	Sí, por confinamiento por contacto estrecho o sospecha de COVID-19	1	0	0	0	0	0	0	0	0	0	39	13	35	87	2	1	1	3	5	5	5	6	0	2	5	6	6	5	4
211	2021-01-30 15:54:03	2021-01-30 16:00:05	00:06:02.016000	1	2	2	1	5	Catalunya	2	2	7	7	3	2	2	1	1	No	No	1	0	0	0	0	0	0	0	0	0	42	19	43	104	3	1	1	3	4	6	5	6	1	4	6	6	6	5	5
213	2021-01-30 15:57:23	2021-01-30 16:05:52	00:08:28.982000	2	2	2	1	5	Catalunya	2	6	10	10	4	2	2	1	1	No	Sí, por problemas de salud físicos	0	0	0	0	2	2	0	1	0	0	29	10	21	60	1	1	1	2	3	3	3	3	1	1	3	3	4	4	2
214	2021-01-30 16:09:44	2021-01-30 16:13:16	00:03:32.976000	1	2	1	1	5	Catalunya	2	9	2	2	1	1	1	1	1	Sí, por primera vez en mi vida	No	1	0	0	0	0	0	0	0	0	0	30	14	38	82	2	1	1	3	1	5	4	4	0	1	5	4	6	5	6
215	2021-01-30 16:08:55	2021-01-30 16:14:07	00:05:11.040000	2	2	2	1	5	Catalunya	1	4	4	4	4	1	1	1	1	No	No	0	0	0	0	0	0	1	0	0	2	17	3	47	67	3	3	3	3	1	3	3	6	0	1	6	3	6	1	1
216	2021-01-30 16:12:29	2021-01-30 16:18:21	00:05:51.994000	2	2	1	1	5	Catalunya	1	12	10	10	2	2	2	2	1	No	No	0	2	2	0	2	2	1	0	2	0	0	0	0	0	1	3	3	1	#NULL!	#NULL!	#NULL!	#NULL!	#NULL!	#NULL!	#NULL!	#NULL!	#NULL!	#NULL!	#NULL!
217	2021-01-30 16:12:17	2021-01-30 16:18:52	00:06:35.021000	1	2	1	1	5	Catalunya	1	3	4	4	3	2	2	1	1	No	No	1	0	0	0	0	0	0	0	0	0	22	9	34	65	2	2	2	2	1	3	4	4	1	2	5	4	5	4	2
218	2021-01-30 16:13:23	2021-01-30 16:25:07	00:11:43.037000	1	2	3	1	5	Catalunya	2	2	13	14	4	2	2	1	1	No	No	0	0	0	0	0	0	1	0	0	0	36	11	21	68	1	1	1	3	1	5	5	6	0	5	6	3	0	3	3
220	2021-01-30 16:33:16	2021-01-30 16:35:53	00:02:38.026000	1	2	1	1	5	Catalunya	1	3	10	10	1	1	1	1	1	Sí, por primera vez en mi vida	No	1	0	0	0	0	0	0	0	0	0	47	16	29	92	1	1	1	3	6	6	6	4	5	5	6	6	4	2	6
221	2021-01-30 16:31:04	2021-01-30 16:36:42	00:05:39.034000	1	2	2	1	5	Catalunya	2	2	11	14	3	1	1	1	1	No	No	0	0	1	0	1	2	0	0	0	0	5	11	45	61	3	3	1	2	0	1	1	6	0	0	6	0	3	1	1
222	2021-01-30 16:32:19	2021-01-30 16:39:19	00:07:01.027000	1	2	2	1	5	Catalunya	2	2	2	2	3	2	2	1	1	No	No	0	2	0	0	2	2	2	0	0	0	37	7	35	79	2	1	2	3	5	5	5	6	0	1	5	6	6	5	1
223	2021-01-30 16:38:09	2021-01-30 16:41:03	00:02:54.010000	2	2	4	1	5	Catalunya	2	6	2	2	4	1	1	1	1	No	No	1	0	0	0	0	0	0	0	0	0	0	0	0	0	1	3	3	1	#NULL!	#NULL!	#NULL!	#NULL!	#NULL!	#NULL!	#NULL!	#NULL!	#NULL!	#NULL!	#NULL!
224	2021-01-30 16:36:00	2021-01-30 16:42:27	00:06:28.022000	1	1	2	1	5	Catalunya	2	2	4	4	2	1	1	1	1	No	No	1	0	0	0	0	0	0	0	0	0	9	5	47	61	3	3	3	2	1	1	1	6	0	1	6	1	6	3	1
226	2021-01-30 16:43:57	2021-01-30 16:52:54	00:08:56.976000	1	2	3	1	5	Catalunya	2	2	2	2	4	2	2	3	2	No	Sí, por problemas de salud físicos	0	3	1	3	3	3	3	1	3	0	11	4	45	60	3	3	3	2	3	3	1	3	0	1	6	1	6	1	2
227	2021-01-30 16:39:52	2021-01-30 16:56:04	00:16:10.963000	2	2	3	1	5	Catalunya	2	2	1	14	2	1	1	3	2	No	Sí, por problemas de salud físicos	0	4	0	4	4	0	4	0	0	0	34	21	32	87	2	1	1	3	4	4	3	4	5	5	5	5	5	5	4
228	2021-01-30 16:47:47	2021-01-30 16:56:30	00:08:42.029000	2	2	2	1	5	Catalunya	2	1	10	10	3	1	1	2	1	No	Sí, por confinamiento por contacto estrecho o sospecha de COVID-19	1	0	0	0	0	0	0	0	0	0	43	5	38	86	2	1	3	3	5	5	5	4	0	5	5	5	6	2	1
229	2021-01-30 16:51:48	2021-01-30 16:57:36	00:05:48.019000	2	2	1	1	5	Catalunya	2	10	10	10	1	1	1	1	1	Sí, anteriormente estaba sin actividad laboral	No	0	2	0	0	0	0	2	0	0	0	23	5	36	64	2	2	3	2	3	5	4	0	1	3	6	1	5	1	2
231	2021-01-30 17:13:27	2021-01-30 17:17:50	00:04:24.038000	1	2	1	1	5	Catalunya	2	6	13	14	3	1	1	1	1	No	No	1	0	0	0	0	0	0	0	0	0	12	7	38	57	2	3	2	2	0	3	0	4	2	0	2	3	6	5	0
232	2021-01-30 17:19:10	2021-01-30 17:28:47	00:09:36.979000	1	2	3	1	5	Catalunya	2	16	9	14	4	1	1	1	1	No	No	0	0	0	0	0	0	2	0	0	0	8	1	43	52	3	3	3	2	0	5	0	6	0	0	1	1	6	0	0
234	2021-01-30 17:52:32	2021-01-30 17:59:37	00:07:03.965000	1	2	2	1	5	Catalunya	2	6	10	10	4	2	2	2	1	No	Sí, por confinamiento por contacto estrecho o sospecha de COVID-19	0	0	0	0	0	0	0	1	0	0	49	14	18	81	1	1	1	3	5	5	6	4	4	5	2	6	2	4	6
235	2021-01-30 17:57:56	2021-01-30 18:08:04	00:10:06.960000	1	2	2	1	5	Catalunya	2	2	7	7	3	2	2	2	1	No	Sí, por confinamiento por contacto estrecho o sospecha de COVID-19	0	0	0	0	0	0	4	0	0	0	35	7	36	78	2	1	2	3	6	6	6	6	0	0	6	6	5	1	3
239	2021-01-30 18:17:54	2021-01-30 18:22:45	00:04:50.995000	2	2	4	1	5	Catalunya	2	2	13	14	4	1	1	1	1	No	Sí, por problemas de salud físicos	1	0	0	0	0	0	0	0	0	0	0	0	0	0	1	3	3	1	#NULL!	#NULL!	#NULL!	#NULL!	#NULL!	#NULL!	#NULL!	#NULL!	#NULL!	#NULL!	#NULL!
240	2021-01-30 18:18:05	2021-01-30 18:23:32	00:05:27.974000	1	2	1	1	5	Catalunya	1	3	4	4	3	2	2	2	1	No	Sí, por confinamiento por contacto estrecho o sospecha de COVID-19	0	0	0	0	0	2	2	1	0	0	42	14	34	90	2	1	1	3	5	5	5	4	4	6	5	6	5	4	4
242	2021-01-30 18:31:54	2021-01-30 18:36:57	00:05:03.005000	2	2	3	1	5	Catalunya	1	12	2	2	4	1	1	1	1	No	No	0	2	0	0	0	1	2	0	0	1	40	8	46	94	3	1	2	3	5	6	6	6	3	1	6	4	6	0	0
243	2021-01-30 18:32:50	2021-01-30 18:43:01	00:10:11.021000	1	2	4	1	5	Catalunya	2	6	7	7	4	2	2	2	1	No	Sí, por confinamiento por contacto estrecho o sospecha de COVID-19	0	0	0	1	0	1	1	0	2	2	47	19	31	97	2	1	1	3	3	6	6	4	5	6	5	6	5	4	6
245	2021-01-30 18:46:18	2021-01-30 18:52:17	00:05:58.042000	2	2	1	1	5	Catalunya	2	7	2	2	1	1	1	2	1	No	No	0	2	0	0	0	0	2	1	0	0	18	6	40	64	2	3	2	2	2	3	4	6	2	3	3	1	6	2	1
247	2021-01-30 18:50:55	2021-01-30 18:56:24	00:05:29.962000	1	2	3	1	5	Catalunya	2	7	2	2	4	2	2	3	2	No	Sí, por confinamiento por contacto estrecho o sospecha de COVID-19	1	0	0	0	0	0	0	0	0	0	38	17	41	96	3	1	1	3	6	6	6	6	6	6	6	5	6	5	3
249	2021-01-30 18:53:18	2021-01-30 18:58:40	00:05:22.013000	2	2	4	1	5	Catalunya	2	2	13	14	4	2	2	1	1	No	Sí, por confinamiento por contacto estrecho o sospecha de COVID-19	1	0	0	0	0	0	0	0	0	0	24	22	45	91	3	2	1	3	0	6	3	6	6	5	6	5	6	6	6
250	2021-01-30 18:54:57	2021-01-30 19:00:54	00:05:57.005000	1	2	1	1	5	Catalunya	1	4	4	4	1	1	1	3	2	No	Sí, por confinamiento por contacto estrecho o sospecha de COVID-19	1	0	0	0	0	0	0	0	0	0	13	11	36	60	2	3	1	2	1	2	3	6	4	3	3	1	6	3	0
251	2021-01-30 18:58:59	2021-01-30 19:05:57	00:06:59.040000	1	2	4	1	5	Catalunya	2	3	7	7	4	2	2	1	1	No	No	0	0	2	0	0	0	2	0	0	0	33	9	22	64	1	1	2	2	6	4	4	3	2	3	3	4	3	3	2
252	2021-01-30 19:01:46	2021-01-30 19:07:26	00:05:39.984000	1	2	2	1	5	Catalunya	2	6	1	14	3	1	1	3	2	No	Sí, por problemas de salud físicos	0	4	0	4	0	0	0	0	0	0	29	0	32	61	2	1	3	2	0	6	6	6	0	1	0	5	4	0	0
253	2021-01-30 19:01:36	2021-01-30 19:07:40	00:06:04.003000	1	2	1	1	5	Catalunya	2	2	2	2	1	2	2	3	2	No	Sí, por confinamiento por contacto estrecho o sospecha de COVID-19	1	0	0	0	0	0	0	0	0	0	20	18	32	70	2	2	1	3	3	4	2	4	5	5	3	2	5	5	5
254	2021-01-30 19:03:01	2021-01-30 19:08:46	00:05:44.995000	2	2	1	1	5	Catalunya	2	8	7	7	1	2	2	3	2	Sí, por primera vez en mi vida	Sí, por confinamiento por contacto estrecho o sospecha de COVID-19	1	0	0	0	0	0	0	0	0	0	25	19	38	82	2	2	1	3	3	3	3	6	1	3	5	2	5	6	6
255	2021-01-30 19:05:38	2021-01-30 19:11:56	00:06:16.963000	1	2	1	1	5	Catalunya	2	16	4	4	2	1	1	3	2	No	No	0	0	0	4	0	0	0	0	0	0	3	3	46	52	3	3	3	2	0	0	1	6	1	1	6	0	5	1	1
256	2021-01-30 19:08:04	2021-01-30 19:14:24	00:06:19.987000	1	2	3	1	5	Catalunya	2	2	2	2	4	2	2	3	2	Sí, anteriormente estaba sin actividad laboral	Sí, por confinamiento por contacto estrecho o sospecha de COVID-19	0	3	0	3	3	3	3	0	3	0	39	12	35	86	2	1	1	3	5	6	6	6	1	1	5	5	5	4	6
258	2021-01-30 19:15:48	2021-01-30 19:25:19	00:09:31.018000	1	2	2	1	5	Catalunya	2	2	2	2	3	2	2	1	1	No	No	1	0	0	0	0	0	0	0	0	0	6	1	47	54	3	3	3	2	0	1	0	6	0	0	6	1	6	0	0
259	2021-01-30 19:26:06	2021-01-30 19:31:44	00:05:36.960000	2	2	4	1	5	Catalunya	1	4	1	14	3	1	1	1	1	No	No	1	0	0	0	0	0	0	0	0	0	32	0	28	60	1	1	3	2	6	6	6	6	0	1	6	5	3	0	0
261	2021-01-30 19:42:15	2021-01-30 19:49:46	00:07:31.008000	1	1	4	1	5	Catalunya	2	17	7	7	4	1	1	1	1	No	No	1	0	0	0	0	0	0	0	0	0	31	13	14	58	1	1	1	2	5	4	1	2	0	4	2	5	1	5	5
262	2021-01-30 19:43:59	2021-01-30 19:54:42	00:10:44.026000	2	2	1	1	5	Catalunya	1	4	4	4	2	1	1	1	1	No	No	0	2	0	0	0	0	2	0	0	0	13	4	47	64	3	3	3	2	1	3	1	6	0	1	6	0	6	3	1
263	2021-01-30 19:52:57	2021-01-30 19:56:42	00:03:44.986000	2	2	4	1	5	Catalunya	1	2	5	14	4	2	2	1	1	Sí, por primera vez en mi vida	No	1	0	0	0	0	0	0	0	0	0	0	0	0	0	1	3	3	1	#NULL!	#NULL!	#NULL!	#NULL!	#NULL!	#NULL!	#NULL!	#NULL!	#NULL!	#NULL!	#NULL!
264	2021-01-30 19:48:45	2021-01-30 20:00:34	00:11:47.962000	1	2	4	1	5	Catalunya	2	6	10	10	4	2	2	1	1	No	No	0	2	2	0	0	0	0	0	0	0	46	6	41	93	3	1	2	3	6	6	3	6	0	6	6	6	5	2	3
266	2021-01-30 19:56:25	2021-01-30 20:04:46	00:08:21.984000	1	1	4	1	5	Catalunya	2	17	7	7	4	2	2	1	1	No	No	0	1	1	0	1	0	0	0	0	0	34	16	26	76	1	1	1	3	3	2	4	6	3	5	2	5	4	5	4
267	2021-01-30 20:08:12	2021-01-30 20:12:59	00:04:47.021000	2	2	2	1	5	Catalunya	1	10	4	4	3	1	1	1	1	No	No	0	0	0	0	0	0	0	0	0	2	15	1	41	57	3	3	3	2	2	2	4	6	0	1	5	1	6	1	0
269	2021-01-30 20:13:27	2021-01-30 20:19:40	00:06:12.038000	1	2	1	1	5	Catalunya	2	3	10	10	1	2	2	1	1	No	No	0	2	0	0	0	2	2	0	2	0	23	1	30	54	1	2	3	2	4	5	5	6	0	2	1	3	5	1	0
273	2021-01-30 20:17:40	2021-01-30 20:23:33	00:05:53.981000	1	2	1	1	5	Catalunya	1	4	4	4	1	1	1	1	1	Sí, anteriormente estaba sin actividad laboral	Sí, por confinamiento por contacto estrecho o sospecha de COVID-19	0	0	0	0	0	0	0	1	2	0	6	2	45	53	3	3	3	2	2	0	0	6	0	0	6	0	6	2	0
274	2021-01-30 20:11:11	2021-01-30 20:26:15	00:15:02.966000	1	2	4	1	5	Catalunya	2	17	7	7	2	1	1	1	1	No	No	1	0	0	0	0	0	0	0	0	0	16	12	29	57	1	3	1	2	1	2	1	6	0	1	1	3	1	4	2
275	2021-01-30 20:21:37	2021-01-30 20:26:50	00:05:13.027000	2	1	3	1	5	Catalunya	1	4	7	7	4	1	1	1	1	No	No	0	0	1	0	0	0	0	0	0	0	26	6	31	63	2	2	2	2	1	3	3	6	2	3	3	3	3	1	1
279	2021-01-30 20:22:43	2021-01-30 20:32:37	00:09:52.963000	2	2	1	1	5	Catalunya	1	4	4	4	1	1	1	1	1	No	No	0	0	1	0	2	0	2	0	0	0	25	14	31	70	2	2	1	3	3	2	4	4	3	3	0	1	4	4	3
280	2021-01-30 20:27:32	2021-01-30 20:33:12	00:05:41.021000	1	2	1	1	5	Catalunya	1	4	4	4	2	1	1	4	2	No	No	1	0	0	0	0	0	0	0	0	0	31	13	40	84	2	1	1	3	2	5	3	6	1	3	5	3	5	4	4
281	2021-01-30 20:24:47	2021-01-30 20:33:15	00:08:28.032000	2	2	1	1	5	Catalunya	1	3	10	10	1	2	2	2	1	Sí, por primera vez en mi vida	Sí, por confinamiento por contacto estrecho o sospecha de COVID-19	1	0	0	0	0	0	0	0	0	0	21	4	33	58	2	2	3	2	2	3	1	4	0	1	2	1	6	2	2
287	2021-01-30 20:29:25	2021-01-30 20:41:46	00:12:20.016000	1	2	4	1	5	Catalunya	2	17	7	7	4	1	1	1	1	No	No	0	0	0	0	0	0	0	1	0	0	54	10	19	83	1	1	1	3	6	6	6	4	0	6	5	6	0	5	4
290	2021-01-30 20:54:08	2021-01-30 21:00:01	00:05:53.030000	2	1	3	1	5	Catalunya	1	15	4	4	4	1	1	1	1	No	No	1	0	0	0	0	0	0	0	0	0	21	3	35	59	2	2	3	2	0	4	2	6	0	3	1	2	2	0	1
291	2021-01-30 20:53:26	2021-01-30 21:00:55	00:07:27.984000	2	2	1	1	5	Catalunya	2	6	10	10	1	1	1	2	1	No	Sí, por confinamiento por contacto estrecho o sospecha de COVID-19	0	2	2	2	0	0	2	0	0	0	39	10	30	79	1	1	1	3	6	5	5	6	2	4	5	6	5	4	4
294	2021-01-30 21:00:59	2021-01-30 21:05:43	00:04:42.960000	1	2	1	1	5	Catalunya	2	10	10	10	2	1	1	1	1	No	No	1	0	0	0	0	0	0	0	0	0	25	3	45	73	3	2	3	3	3	6	3	6	1	2	6	2	6	0	2
295	2021-01-30 20:58:08	2021-01-30 21:06:26	00:08:18.010000	1	2	2	1	5	Catalunya	2	17	10	10	1	2	2	1	1	No	No	0	0	0	0	2	0	2	0	0	0	36	15	32	83	2	1	1	3	3	6	3	6	5	5	6	5	5	3	3
297	2021-01-30 20:35:29	2021-01-30 21:09:43	00:34:13.037000	2	2	4	1	5	Catalunya	2	3	2	2	4	2	2	3	2	No	Sí, por problemas de salud físicos	0	0	0	0	0	0	0	4	0	0	22	10	38	70	2	2	1	3	1	4	1	6	1	2	2	3	5	1	0
298	2021-01-30 21:03:48	2021-01-30 21:10:37	00:06:47.981000	1	2	1	1	5	Catalunya	2	9	10	10	2	1	1	1	1	No	No	0	2	0	0	0	0	0	0	0	0	31	0	47	78	3	1	3	3	3	6	2	6	0	6	6	3	6	0	0
299	2021-01-30 21:04:05	2021-01-30 21:11:21	00:07:15.024000	1	2	2	1	5	Catalunya	1	17	13	14	2	1	1	1	1	No	No	0	0	0	0	0	0	0	0	0	1	54	20	36	110	2	1	1	3	6	6	6	6	5	6	6	6	5	1	6
304	2021-01-30 21:15:07	2021-01-30 21:22:57	00:07:48.979000	1	2	2	1	5	Catalunya	1	15	10	10	3	1	1	1	1	No	Sí, por confinamiento por contacto estrecho o sospecha de COVID-19	1	0	0	0	0	0	0	0	0	0	15	9	23	47	1	3	2	2	1	3	2	6	1	1	1	2	3	3	3
308	2021-01-30 21:20:22	2021-01-30 21:26:49	00:06:26.035000	1	2	2	1	5	Catalunya	2	16	10	10	1	1	1	3	2	No	Sí, por confinamiento por contacto estrecho o sospecha de COVID-19	0	4	0	4	0	0	0	0	0	0	23	3	35	61	2	2	3	2	2	3	4	6	0	1	3	4	3	2	1
309	2021-01-30 21:16:38	2021-01-30 21:27:31	00:10:51.974000	1	2	4	1	5	Catalunya	2	6	10	10	4	2	2	3	2	No	Sí, por confinamiento por contacto estrecho o sospecha de COVID-19	1	0	0	0	0	0	0	0	0	0	16	1	34	51	2	3	3	2	1	6	1	4	0	1	3	1	6	0	1
310	2021-01-30 21:25:24	2021-01-30 21:28:02	00:02:38.976000	1	2	1	1	5	Catalunya	1	4	10	10	3	1	1	1	1	No	No	1	0	0	0	0	0	0	0	0	0	0	0	0	0	1	3	3	1	#NULL!	#NULL!	#NULL!	#NULL!	#NULL!	#NULL!	#NULL!	#NULL!	#NULL!	#NULL!	#NULL!
313	2021-01-30 21:30:23	2021-01-30 21:35:25	00:05:01.968000	1	2	1	1	5	Catalunya	1	6	10	10	1	2	2	3	2	No	Sí, por problemas de salud físicos	0	2	0	1	1	4	1	1	0	0	37	18	25	80	1	1	1	3	4	4	4	2	2	5	5	6	3	4	4
314	2021-01-30 20:44:55	2021-01-30 21:35:33	00:50:37.997000	1	2	5	1	5	Catalunya	1	2	7	7	4	3	1	1	1	No	No	1	0	0	0	0	0	0	0	0	0	29	2	46	77	3	1	3	3	0	5	4	6	0	4	6	5	6	1	1
316	2021-01-30 21:31:49	2021-01-30 21:38:00	00:06:12.038000	1	1	1	1	5	Catalunya	2	2	2	2	3	2	2	1	1	No	No	0	2	2	0	0	2	0	0	0	0	37	19	36	92	2	1	1	3	5	4	2	4	4	4	6	5	4	4	4
317	2021-01-30 21:32:15	2021-01-30 21:39:46	00:07:31.958000	2	2	4	1	5	Catalunya	2	2	7	7	4	2	2	1	1	No	No	0	0	0	0	0	1	0	0	0	0	18	2	47	67	3	3	3	3	1	4	1	6	0	2	6	1	6	0	1
319	2021-01-30 21:41:51	2021-01-30 21:46:16	00:04:24.989000	2	2	2	1	5	Catalunya	1	8	10	10	3	1	1	1	1	No	No	1	0	0	0	0	0	0	0	0	0	0	0	0	0	1	3	3	1	#NULL!	#NULL!	#NULL!	#NULL!	#NULL!	#NULL!	#NULL!	#NULL!	#NULL!	#NULL!	#NULL!
320	2021-01-30 21:43:18	2021-01-30 21:49:24	00:06:05.990000	1	2	1	1	5	Catalunya	1	15	10	10	1	2	2	1	1	No	No	0	2	0	2	0	0	2	0	0	0	29	17	40	86	2	1	1	3	1	3	3	6	1	2	6	4	3	4	4
327	2021-01-30 21:54:12	2021-01-30 22:01:38	00:07:25.997000	1	2	4	1	5	Catalunya	2	7	7	7	4	2	2	1	1	No	No	1	0	0	0	0	0	0	0	0	0	44	1	35	80	2	1	3	3	4	6	6	6	0	4	6	6	6	0	0
332	2021-01-30 21:54:24	2021-01-30 22:06:44	00:12:18.979000	2	2	3	1	5	Catalunya	1	4	4	4	4	1	1	1	1	No	No	1	0	0	0	0	0	0	0	0	0	19	4	37	60	2	3	3	2	0	1	1	4	1	3	4	3	4	1	1
335	2021-01-30 22:00:21	2021-01-30 22:07:35	00:07:13.987000	2	2	4	1	5	Catalunya	2	2	2	2	4	3	1	1	1	No	Sí, por problemas de salud físicos	1	0	0	0	0	0	0	0	0	0	35	13	36	84	2	1	1	3	6	6	6	6	0	0	5	6	5	5	5
353	2021-01-30 22:13:04	2021-01-30 22:18:26	00:05:22.013000	2	1	3	1	5	Catalunya	2	2	13	14	4	2	2	2	1	No	Sí, por confinamiento por contacto estrecho o sospecha de COVID-19	1	0	0	0	0	0	0	0	0	0	48	12	29	89	1	1	1	3	6	6	6	6	0	6	5	6	3	6	6
356	2021-01-30 22:16:02	2021-01-30 22:22:21	00:06:19.987000	1	2	1	1	5	Catalunya	1	3	10	10	1	2	2	3	2	No	Sí, por confinamiento por contacto estrecho o sospecha de COVID-19	0	0	0	0	0	0	0	1	0	0	28	19	28	75	1	1	1	3	3	5	4	4	6	0	5	3	2	5	4
360	2021-01-30 21:44:19	2021-01-30 22:23:33	00:39:13.968000	2	2	3	1	5	Catalunya	1	6	1	14	4	1	1	2	1	No	Sí, por confinamiento por contacto estrecho o sospecha de COVID-19	1	0	0	0	0	0	0	0	0	0	11	13	31	55	2	3	1	2	0	5	2	1	1	0	1	1	6	1	6
365	2021-01-30 22:22:07	2021-01-30 22:29:14	00:07:06.038000	1	2	4	1	5	Catalunya	2	2	13	14	4	2	2	1	1	No	No	0	0	0	0	0	0	2	0	0	0	33	18	38	89	2	1	1	3	0	6	6	6	5	1	5	6	6	4	5
371	2021-01-30 22:23:07	2021-01-30 22:33:09	00:10:02.986000	2	2	4	1	5	Catalunya	2	2	2	2	4	1	1	4	2	Sí, anteriormente estaba sin actividad laboral	No	0	1	0	4	0	0	2	1	4	0	12	4	42	58	3	3	3	2	1	4	1	6	0	1	6	1	6	1	1
378	2021-01-30 22:33:06	2021-01-30 22:39:15	00:06:09.014000	2	2	4	1	5	Catalunya	2	3	7	7	4	1	1	3	2	No	Sí, por problemas de salud físicos	1	0	0	0	0	0	0	0	0	0	20	7	39	66	2	2	2	2	1	5	1	6	0	1	6	1	5	1	6
379	2021-01-30 22:28:15	2021-01-30 22:40:23	00:12:06.970000	2	2	2	1	5	Catalunya	2	2	2	2	2	2	2	2	1	No	Sí, por confinamiento por contacto estrecho o sospecha de COVID-19	1	0	0	0	0	0	0	0	0	0	37	3	27	67	1	1	3	3	2	6	5	6	0	4	4	3	3	0	0
381	2021-01-30 22:37:45	2021-01-30 22:44:50	00:07:05.002000	1	2	3	1	5	Catalunya	2	2	13	14	4	2	2	2	1	No	Sí, por confinamiento por contacto estrecho o sospecha de COVID-19	0	2	2	0	2	1	2	1	2	0	54	25	32	111	2	1	1	3	6	6	6	6	6	6	6	6	5	6	6
387	2021-01-30 22:42:58	2021-01-30 22:50:24	00:07:27.034000	1	2	3	1	5	Catalunya	2	2	2	2	4	2	2	1	1	No	No	0	0	0	1	1	2	2	0	0	0	21	9	46	76	3	2	2	3	1	5	3	6	1	2	5	2	6	3	1
392	2021-01-30 22:41:38	2021-01-30 22:54:16	00:12:37.037000	1	2	2	1	5	Catalunya	2	10	10	10	2	1	1	1	1	No	No	1	0	0	0	0	0	0	0	0	0	48	13	37	98	2	1	1	3	6	6	6	6	5	6	6	6	5	4	4
394	2021-01-30 22:46:43	2021-01-30 22:55:08	00:08:23.971000	2	2	1	1	5	Catalunya	1	4	9	14	1	1	1	2	1	No	Sí, por confinamiento por contacto estrecho o sospecha de COVID-19	1	0	0	0	0	0	0	0	0	0	43	5	7	55	1	1	3	2	6	5	6	2	0	6	1	6	1	2	3
405	2021-01-30 23:05:21	2021-01-30 23:11:01	00:05:39.984000	1	2	2	1	5	Catalunya	2	14	10	10	3	1	1	2	1	No	Sí, por confinamiento por contacto estrecho o sospecha de COVID-19	0	0	2	0	0	0	0	0	0	0	24	1	29	54	1	2	3	2	3	3	3	6	1	3	3	3	3	0	0
410	2021-01-30 23:03:51	2021-01-30 23:14:07	00:10:16.032000	1	1	1	1	5	Catalunya	1	4	10	10	2	2	2	1	1	No	No	0	0	0	1	0	0	0	0	0	0	17	8	41	66	3	3	2	2	3	4	0	6	0	0	6	2	5	4	3
411	2021-01-30 23:04:20	2021-01-30 23:14:49	00:10:28.992000	1	1	3	1	5	Catalunya	1	4	4	4	4	1	1	2	1	No	Sí, por confinamiento por contacto estrecho o sospecha de COVID-19	1	0	0	0	0	0	0	0	0	0	4	0	38	42	2	3	3	2	1	0	0	6	0	0	1	0	4	0	0
416	2021-01-30 23:13:15	2021-01-30 23:18:37	00:05:22.963000	1	2	1	1	5	Catalunya	1	5	3	14	3	1	1	2	1	No	Sí, por confinamiento por contacto estrecho o sospecha de COVID-19	0	0	2	0	0	0	2	0	0	0	43	16	31	90	2	1	1	3	4	6	6	4	3	6	4	5	5	4	3
418	2021-01-30 23:13:41	2021-01-30 23:22:06	00:08:23.971000	2	2	2	1	5	Catalunya	2	7	1	14	4	2	2	1	1	No	No	0	2	0	0	0	2	2	1	1	0	51	26	41	118	3	1	1	3	5	6	6	6	4	5	6	6	6	6	6
426	2021-01-30 23:26:10	2021-01-30 23:34:34	00:08:23.971000	1	2	4	1	5	Catalunya	2	2	7	7	4	2	2	3	2	No	Sí, por confinamiento por contacto estrecho o sospecha de COVID-19	0	0	0	0	0	0	4	0	0	0	10	2	38	50	2	3	3	2	0	1	3	6	0	1	2	1	1	1	1
427	2021-01-30 23:26:21	2021-01-30 23:34:46	00:08:25.958000	1	2	3	1	5	Catalunya	2	2	2	2	3	2	2	1	1	No	Sí, por confinamiento por contacto estrecho o sospecha de COVID-19	0	0	1	1	0	1	2	0	1	0	49	25	25	99	1	1	1	3	6	5	6	4	5	6	6	6	5	6	5
430	2021-01-30 23:32:16	2021-01-30 23:45:08	00:12:51.034000	1	2	4	1	5	Catalunya	2	17	7	7	4	2	2	1	1	No	No	1	0	0	0	0	0	0	0	0	0	43	9	25	77	1	1	2	3	6	6	6	6	0	1	5	6	0	1	1
431	2021-01-30 23:40:50	2021-01-30 23:45:56	00:05:06.979000	1	2	3	1	5	Catalunya	1	4	4	4	4	1	1	1	1	Sí, anteriormente estaba sin actividad laboral	No	1	0	0	0	0	0	0	0	0	0	2	1	47	50	3	3	3	2	0	0	0	6	0	0	6	0	6	0	0
439	2021-01-30 23:47:27	2021-01-30 23:57:24	00:09:57.024000	2	1	1	1	5	Catalunya	1	13	4	4	1	1	1	1	1	Sí, por primera vez en mi vida	No	1	0	0	0	0	0	0	0	0	0	15	0	27	42	1	3	3	2	1	5	0	6	0	0	0	0	0	0	0
445	2021-01-31 00:20:26	2021-01-31 00:25:39	00:05:13.027000	1	2	1	1	5	Catalunya	2	6	1	14	3	2	2	2	1	No	No	0	2	0	2	2	0	2	0	0	0	30	10	31	71	2	1	1	3	4	5	6	6	0	0	3	4	6	5	5
450	2021-01-31 00:39:11	2021-01-31 00:58:17	00:19:06.010000	1	2	1	1	5	Catalunya	1	3	10	10	1	2	2	2	1	No	Sí, por confinamiento por contacto estrecho o sospecha de COVID-19	0	0	0	0	0	0	0	1	0	0	13	1	21	35	1	3	3	2	1	3	3	6	0	1	1	1	1	0	0
457	2021-01-31 01:16:35	2021-01-31 03:25:20	02:08:45.974000	2	2	1	1	5	Catalunya	2	3	7	7	1	1	1	1	1	Sí, anteriormente estaba sin actividad laboral	No	0	0	0	0	1	0	0	0	1	0	28	2	41	71	3	1	3	3	1	6	2	6	1	1	5	6	6	0	0
460	2021-01-31 06:53:58	2021-01-31 06:59:20	00:05:20.976000	1	2	4	1	5	Catalunya	1	4	7	7	4	1	1	1	1	No	No	1	0	0	0	0	0	0	0	0	0	19	5	40	64	2	3	3	2	1	1	1	3	5	1	6	1	5	0	0
461	2021-01-31 06:58:54	2021-01-31 07:11:26	00:12:32.026000	1	2	2	1	5	Catalunya	1	4	4	4	1	1	1	1	1	Sí, anteriormente estaba sin actividad laboral	No	0	2	0	0	0	2	2	1	2	0	3	1	48	52	3	3	3	2	1	1	0	6	0	0	6	0	6	1	0
462	2021-01-31 07:23:19	2021-01-31 07:32:07	00:08:47.040000	2	2	2	1	5	Catalunya	2	3	10	10	3	2	2	3	2	No	No	0	4	0	0	0	4	4	0	0	0	31	17	34	82	2	1	1	3	5	6	3	6	6	3	5	3	5	4	5
464	2021-01-31 08:42:15	2021-01-31 08:48:35	00:06:21.024000	2	2	2	1	5	Catalunya	2	3	11	14	3	1	1	1	1	No	Sí, por confinamiento por contacto estrecho o sospecha de COVID-19	0	2	0	0	0	0	2	1	0	0	36	10	23	69	1	1	1	3	6	5	5	6	1	3	4	5	5	3	1
465	2021-01-30 21:27:57	2021-01-31 08:50:12	11:22:15.974000	2	1	3	1	5	Catalunya	1	4	4	4	4	1	1	1	1	No	No	1	0	0	0	0	0	0	0	0	0	18	8	42	68	3	3	2	3	1	3	2	6	5	5	6	2	6	1	2
467	2021-01-31 08:57:23	2021-01-31 09:02:10	00:04:47.971000	1	2	1	1	5	Catalunya	2	6	10	10	1	1	1	1	1	Sí, por primera vez en mi vida	No	0	0	0	0	1	0	0	0	0	0	40	6	36	82	2	1	2	3	4	6	6	6	0	4	5	5	6	0	6
483	2021-01-31 09:18:57	2021-01-31 09:23:44	00:04:47.971000	2	1	1	1	5	Catalunya	1	11	4	4	1	1	1	1	1	Sí, por primera vez en mi vida	No	0	0	0	0	2	1	1	0	0	0	25	9	36	70	2	2	2	3	3	6	6	6	1	1	5	1	5	3	1
485	2021-01-31 09:11:38	2021-01-31 09:26:37	00:14:58.992000	2	2	2	1	5	Catalunya	2	3	4	4	3	2	2	1	1	No	No	1	0	0	0	0	0	0	0	0	0	17	2	40	59	2	3	3	2	1	5	5	4	0	1	5	1	6	1	1
486	2021-01-31 09:21:41	2021-01-31 09:28:20	00:06:37.958000	2	1	2	1	5	Catalunya	2	10	4	4	3	1	1	1	1	No	No	1	0	0	0	0	0	0	0	0	0	46	7	43	96	3	1	2	3	6	6	4	6	0	6	6	6	6	1	0
487	2021-01-31 09:26:49	2021-01-31 09:30:49	00:04:00.970000	1	1	1	1	5	Catalunya	1	4	4	4	1	1	1	1	1	No	Sí, por confinamiento por contacto estrecho o sospecha de COVID-19	0	0	0	1	0	0	0	0	0	0	21	14	31	66	2	2	1	2	0	3	3	3	0	0	0	3	6	2	4
489	2021-01-31 09:35:47	2021-01-31 09:41:18	00:05:30.998000	1	1	2	1	5	Catalunya	2	7	4	4	4	2	2	3	2	No	Sí, por confinamiento por contacto estrecho o sospecha de COVID-19	0	3	0	3	3	3	0	0	3	0	6	2	35	43	2	3	3	2	1	1	1	6	0	0	2	1	6	0	1
490	2021-01-31 09:30:51	2021-01-31 09:42:30	00:11:38.026000	1	2	4	1	5	Catalunya	1	10	4	4	4	1	1	4	2	No	No	0	0	0	2	1	1	2	1	0	0	33	6	36	75	2	1	2	3	3	6	2	6	1	4	3	3	5	1	1
492	2021-01-31 09:44:51	2021-01-31 09:55:51	00:11:00.960000	2	1	3	1	5	Catalunya	1	6	4	4	4	2	2	1	1	No	No	1	0	0	0	0	0	0	0	0	0	22	9	40	71	2	2	2	3	0	5	1	6	0	1	1	6	6	6	0
494	2021-01-31 09:52:06	2021-01-31 09:57:34	00:05:29.011000	1	1	1	1	5	Catalunya	1	4	4	4	1	1	1	1	1	Sí, anteriormente estaba sin actividad laboral	No	0	0	0	0	0	0	0	1	0	0	17	3	38	58	2	3	3	2	5	1	1	6	0	0	6	3	4	3	0
498	2021-01-31 10:04:56	2021-01-31 10:09:40	00:04:43.997000	1	2	1	1	5	Catalunya	1	3	4	4	1	3	1	3	2	No	Sí, por confinamiento por contacto estrecho o sospecha de COVID-19	0	2	0	0	2	0	2	0	0	0	44	17	35	96	2	1	1	3	4	5	5	4	0	4	5	5	6	6	6
499	2021-01-31 10:04:16	2021-01-31 10:10:06	00:05:51.043000	2	1	1	1	5	Catalunya	1	4	4	4	2	1	1	2	1	No	Sí, por confinamiento por contacto estrecho o sospecha de COVID-19	1	0	0	0	0	0	0	0	0	0	6	1	36	43	2	3	3	2	0	3	3	6	0	0	1	0	6	1	0
503	2021-01-31 10:16:17	2021-01-31 10:22:28	00:06:12.038000	1	2	3	1	5	Catalunya	1	3	10	10	4	2	2	2	1	No	No	0	2	0	2	1	2	2	0	0	0	48	27	33	108	2	1	1	3	4	6	5	4	5	6	5	5	4	6	6
505	2021-01-31 10:23:54	2021-01-31 10:29:28	00:05:34.022000	1	2	3	1	5	Catalunya	1	3	11	14	3	1	1	1	1	No	No	0	0	0	0	0	1	1	0	0	0	10	0	43	53	3	3	3	2	1	2	2	6	0	0	6	1	6	0	0
510	2021-01-31 10:35:46	2021-01-31 10:43:35	00:07:48.029000	1	2	3	1	5	Catalunya	1	3	9	14	3	1	1	1	1	No	No	1	0	0	0	0	0	0	0	0	0	13	12	38	63	2	3	1	2	1	1	1	6	2	4	4	1	6	4	2
511	2021-01-31 10:37:39	2021-01-31 10:44:39	00:06:59.040000	1	2	2	1	5	Catalunya	2	3	10	10	3	2	2	1	1	No	No	0	2	0	0	0	0	0	0	0	0	25	14	41	80	3	2	1	3	1	5	3	6	0	3	6	5	6	6	6
513	2021-01-31 10:41:10	2021-01-31 10:52:10	00:11:00.010000	1	2	1	1	5	Catalunya	1	4	4	4	1	1	1	1	1	No	No	0	0	0	2	0	0	0	1	0	0	15	3	40	58	2	3	3	2	1	2	2	6	0	1	4	2	5	1	1
514	2021-01-31 10:47:33	2021-01-31 10:59:31	00:11:57.034000	1	2	3	1	5	Catalunya	2	16	9	14	4	1	1	4	2	No	No	0	0	2	0	0	4	4	0	0	0	36	6	34	76	2	1	2	3	4	5	4	6	0	4	3	3	4	2	1
515	2021-01-31 10:55:06	2021-01-31 11:00:04	00:04:57.994000	1	2	1	1	5	Catalunya	2	6	4	4	1	2	2	1	1	No	No	0	2	0	0	0	1	0	0	0	0	47	17	43	107	3	1	1	3	3	6	5	4	4	6	6	6	6	5	5
517	2021-01-31 10:55:24	2021-01-31 11:04:29	00:09:05.011000	1	2	4	1	5	Catalunya	1	3	2	2	4	1	1	1	1	No	No	0	0	1	0	0	1	1	1	0	0	14	3	28	45	1	3	3	2	1	1	1	6	0	0	1	2	1	1	1
519	2021-01-31 11:08:26	2021-01-31 11:12:47	00:04:21.014000	1	2	2	1	5	Catalunya	1	3	13	14	1	1	1	1	1	No	No	1	0	0	0	0	0	0	0	0	0	16	0	47	63	3	3	3	2	1	5	3	6	0	0	6	1	6	0	0
520	2021-01-31 11:07:32	2021-01-31 11:14:39	00:07:06.989000	1	2	3	1	5	Catalunya	2	17	10	10	4	1	1	1	1	No	No	1	0	0	0	0	0	0	0	0	0	16	8	35	59	2	3	2	2	1	3	1	6	1	2	3	1	6	4	1
521	2021-01-31 11:12:12	2021-01-31 11:17:40	00:05:27.024000	1	2	3	1	5	Catalunya	2	6	5	14	4	1	1	1	1	No	No	1	0	0	0	0	0	0	0	0	0	45	0	35	80	2	1	3	3	4	4	6	6	0	5	5	5	5	0	0
523	2021-01-31 11:19:17	2021-01-31 11:24:01	00:04:45.034000	1	2	1	1	5	Catalunya	2	17	10	10	1	1	1	1	1	No	No	1	0	0	0	0	0	0	0	0	0	0	0	0	0	1	3	3	1	#NULL!	#NULL!	#NULL!	#NULL!	#NULL!	#NULL!	#NULL!	#NULL!	#NULL!	#NULL!	#NULL!
524	2021-01-31 11:20:13	2021-01-31 11:26:45	00:06:33.034000	1	2	1	1	5	Catalunya	2	3	10	10	1	1	1	3	2	No	Sí, por confinamiento por contacto estrecho o sospecha de COVID-19	0	4	0	0	0	0	2	0	0	0	11	7	33	51	2	3	2	2	1	3	1	6	0	1	1	3	6	5	1
525	2021-01-31 11:22:13	2021-01-31 11:27:02	00:04:49.958000	2	2	2	1	5	Catalunya	2	2	4	4	4	1	1	2	1	No	No	1	0	0	0	0	0	0	0	0	0	35	11	36	82	2	1	1	3	5	5	4	6	4	4	6	5	5	3	4
527	2021-01-31 11:33:24	2021-01-31 11:40:13	00:06:47.981000	2	2	3	1	5	Catalunya	2	3	7	7	4	2	2	1	1	No	No	1	0	0	0	0	0	0	0	0	0	24	11	30	65	1	2	1	2	1	3	3	4	3	2	1	3	5	1	0
530	2021-01-31 12:03:32	2021-01-31 12:09:59	00:06:26.986000	1	2	3	1	5	Catalunya	2	2	7	7	3	2	2	3	2	No	Sí, por confinamiento por contacto estrecho o sospecha de COVID-19	0	0	0	0	0	4	2	0	0	0	38	23	34	95	2	1	1	3	5	5	4	4	4	5	5	5	4	5	5
535	2021-01-31 12:19:35	2021-01-31 12:24:02	00:04:26.026000	1	2	3	1	5	Catalunya	1	4	4	4	4	1	1	1	1	No	No	1	0	0	0	0	0	0	0	0	0	17	10	44	71	3	3	1	3	0	0	0	6	0	1	6	5	6	5	5
536	2021-01-31 12:23:34	2021-01-31 12:31:28	00:07:55.027000	1	2	2	1	5	Catalunya	1	3	10	10	3	2	2	1	1	No	No	1	0	0	0	0	0	0	0	0	0	19	0	41	60	3	3	3	2	3	3	1	4	0	1	4	1	6	0	0
537	2021-01-31 12:32:06	2021-01-31 12:36:47	00:04:40.973000	1	2	2	1	5	Catalunya	1	3	10	10	3	2	2	1	1	No	No	1	0	0	0	0	0	0	0	0	0	13	8	41	62	3	3	2	2	1	1	1	4	0	1	6	1	6	1	1
540	2021-01-31 12:40:57	2021-01-31 12:45:57	00:05:01.018000	2	2	2	1	5	Catalunya	1	4	10	10	3	1	1	3	2	No	Sí, por problemas de salud físicos	0	4	4	4	4	4	4	4	4	0	51	8	45	104	3	1	2	3	6	6	6	6	0	6	5	6	6	3	0
544	2021-01-31 12:49:33	2021-01-31 12:56:00	00:06:26.986000	2	2	4	1	5	Catalunya	2	2	7	7	3	3	1	1	1	No	Sí, por confinamiento por contacto estrecho o sospecha de COVID-19	0	0	1	0	2	2	0	0	1	0	22	4	35	61	2	2	3	2	3	1	2	6	1	1	3	3	6	1	2
547	2021-01-31 13:00:00	2021-01-31 13:07:35	00:07:34.982000	2	2	3	1	5	Catalunya	2	6	4	4	4	1	1	1	1	No	No	0	0	1	0	0	1	1	0	1	0	24	4	36	64	2	2	3	2	5	5	3	6	0	0	6	5	4	1	0
550	2021-01-31 13:15:22	2021-01-31 13:21:31	00:06:09.965000	2	2	2	1	5	Catalunya	2	14	9	14	2	1	1	1	1	No	No	1	0	0	0	0	0	0	0	0	0	37	12	36	85	2	1	1	3	5	4	5	6	1	4	5	5	5	4	4
552	2021-01-31 13:17:50	2021-01-31 13:25:17	00:07:27.034000	2	1	1	1	5	Catalunya	2	3	10	10	2	1	1	1	1	No	No	1	0	0	0	0	0	0	0	0	0	16	1	44	61	3	3	3	2	3	3	5	6	0	1	4	1	5	0	0
554	2021-01-31 13:23:03	2021-01-31 13:31:09	00:08:04.963000	1	2	3	1	5	Catalunya	2	10	10	10	3	2	2	1	1	No	No	0	0	1	0	0	1	0	1	0	0	5	3	42	50	3	3	3	2	1	1	1	6	1	0	4	0	5	1	1
556	2021-01-31 13:34:07	2021-01-31 13:37:50	00:03:41.962000	1	2	3	1	5	Catalunya	2	2	2	2	4	2	2	3	2	No	Sí, por problemas de salud físicos	0	1	2	0	0	2	2	1	0	2	46	23	29	98	1	1	1	3	5	5	5	4	5	5	5	5	4	5	5
558	2021-01-31 13:37:08	2021-01-31 13:41:50	00:04:42.010000	2	2	2	1	5	Catalunya	2	14	7	7	3	1	1	1	1	No	No	0	0	1	0	0	0	0	0	0	0	42	6	36	84	2	1	2	3	3	5	5	6	0	4	6	5	5	2	2
561	2021-01-31 13:52:24	2021-01-31 13:54:49	00:02:24.979000	1	2	3	1	5	Catalunya	2	11	10	10	4	1	1	1	1	No	No	1	0	0	0	0	0	0	0	0	0	0	0	0	0	1	3	3	1	#NULL!	#NULL!	#NULL!	#NULL!	#NULL!	#NULL!	#NULL!	#NULL!	#NULL!	#NULL!	#NULL!
565	2021-01-31 13:54:51	2021-01-31 14:01:26	00:06:35.971000	2	2	1	1	5	Catalunya	1	3	10	10	2	2	2	1	1	No	No	0	0	0	2	0	2	2	1	0	1	27	12	43	82	3	1	1	3	1	6	5	6	1	4	6	1	6	5	6
567	2021-01-31 13:04:37	2021-01-31 14:08:38	01:04:02.035000	2	2	2	1	5	Catalunya	1	3	2	2	3	2	2	1	1	No	Sí, por problemas de salud físicos	1	0	0	0	0	0	0	0	0	0	43	11	26	80	1	1	1	3	6	6	6	6	1	3	4	6	3	2	5
569	2021-01-31 14:17:01	2021-01-31 14:24:15	00:07:13.037000	1	2	3	1	5	Catalunya	1	4	4	4	4	1	1	1	1	No	No	0	0	0	0	0	2	0	0	0	0	27	9	39	75	2	1	2	3	0	6	2	6	0	5	5	5	6	4	4
573	2021-01-31 14:35:35	2021-01-31 14:46:19	00:10:44.976000	1	2	1	1	5	Catalunya	2	6	4	4	1	2	2	2	1	Sí, por primera vez en mi vida	Sí, por confinamiento por contacto estrecho o sospecha de COVID-19	1	0	0	0	0	0	0	0	0	0	21	6	36	63	2	2	2	2	1	6	3	6	2	1	6	3	6	3	0
574	2021-01-31 14:42:31	2021-01-31 14:48:14	00:05:41.971000	1	2	1	1	5	Catalunya	2	6	4	4	1	2	2	3	2	No	No	0	2	0	0	0	0	2	1	0	0	25	15	44	84	3	2	1	3	3	6	5	6	1	0	5	3	6	6	5
575	2021-01-31 14:42:10	2021-01-31 14:49:31	00:07:22.022000	1	1	3	1	5	Catalunya	2	7	2	2	4	2	2	1	1	No	No	0	2	2	0	0	0	0	0	0	0	16	7	22	45	1	3	2	2	3	2	2	2	2	1	4	3	4	2	2
576	2021-01-31 14:47:46	2021-01-31 14:53:19	00:05:34.022000	1	2	2	1	5	Catalunya	2	3	2	2	3	2	2	1	1	No	No	0	0	0	0	0	0	2	0	0	0	26	16	29	71	1	2	1	3	0	6	6	6	3	0	2	6	5	5	5
577	2021-01-31 14:49:03	2021-01-31 14:54:18	00:05:15.014000	2	2	3	1	5	Catalunya	1	3	4	4	3	2	2	3	2	No	Sí, por problemas de salud físicos	0	4	4	4	4	4	0	0	4	0	47	17	36	100	2	1	1	3	6	6	6	6	4	4	5	6	6	5	4
578	2021-01-31 14:19:57	2021-01-31 15:07:53	00:47:55.997000	2	2	1	1	5	Catalunya	1	10	10	10	1	1	1	1	1	No	No	0	0	2	0	2	2	2	1	0	0	35	12	43	90	3	1	1	3	4	6	4	6	3	2	6	3	5	4	5
579	2021-01-31 15:16:34	2021-01-31 15:24:23	00:07:48.979000	2	2	3	1	5	Catalunya	2	3	4	4	4	2	2	3	2	No	Sí, por confinamiento por contacto estrecho o sospecha de COVID-19	0	4	4	0	0	4	0	4	0	0	25	12	47	84	3	2	1	3	3	3	1	6	2	2	6	2	6	5	4
581	2021-01-31 15:28:00	2021-01-31 15:31:42	00:03:41.011000	2	1	1	1	5	Catalunya	1	13	4	4	1	1	1	2	1	No	No	1	0	0	0	0	0	0	0	0	0	12	5	45	62	3	3	3	2	3	1	1	4	3	0	6	0	6	1	1
582	2021-01-31 15:44:40	2021-01-31 15:50:50	00:06:09.965000	1	2	1	1	5	Catalunya	1	4	4	4	2	1	1	1	1	No	No	0	0	0	0	0	1	1	0	0	0	35	11	36	82	2	1	1	3	1	5	3	6	1	5	5	5	5	3	3
583	2021-01-31 15:47:52	2021-01-31 15:58:21	00:10:28.992000	2	2	3	1	5	Catalunya	2	2	2	2	3	2	2	1	1	No	No	0	2	0	0	0	0	0	0	0	0	40	6	25	71	1	1	2	3	5	6	5	4	1	2	4	5	3	2	2
584	2021-01-31 16:09:26	2021-01-31 16:16:49	00:07:22.973000	1	2	3	1	5	Catalunya	1	3	7	7	4	2	2	3	2	No	Sí, por confinamiento por contacto estrecho o sospecha de COVID-19	0	2	2	0	0	2	0	0	0	0	14	10	36	60	2	3	1	2	1	4	4	6	2	0	2	1	6	1	2
585	2021-01-31 16:33:58	2021-01-31 16:39:48	00:05:51.043000	1	2	2	1	5	Catalunya	2	2	7	7	1	2	2	2	1	No	Sí, por confinamiento por contacto estrecho o sospecha de COVID-19	0	2	0	0	2	1	2	0	0	0	38	21	29	88	1	1	1	3	3	6	4	4	1	6	6	4	5	6	6
587	2021-01-31 16:35:08	2021-01-31 16:42:49	00:07:41.030000	1	1	2	1	5	Catalunya	1	4	4	4	3	1	1	1	1	No	No	0	2	0	0	0	0	0	0	0	0	11	2	30	43	1	3	3	2	1	1	1	1	0	1	3	1	5	2	0
589	2021-01-31 17:43:35	2021-01-31 17:48:05	00:04:30	1	2	3	1	5	Catalunya	2	1	4	4	4	2	2	1	1	No	No	0	2	0	0	0	0	0	0	0	0	29	7	47	83	3	1	2	3	1	6	6	6	1	1	6	6	6	1	0
590	2021-01-31 17:49:01	2021-01-31 17:53:38	00:04:35.962000	1	2	2	1	5	Catalunya	1	4	4	4	3	1	1	2	1	No	No	0	0	0	0	0	0	2	0	0	0	42	21	29	92	1	1	1	3	4	5	3	6	5	6	1	6	4	6	6
592	2021-01-31 17:37:19	2021-01-31 17:56:06	00:18:47.002000	1	2	3	1	5	Catalunya	1	10	4	4	4	1	1	1	1	No	No	0	0	2	0	0	1	0	0	0	0	23	4	41	68	3	2	3	3	2	5	4	6	0	1	5	5	6	3	1
595	2021-01-31 18:35:28	2021-01-31 18:42:02	00:06:33.984000	1	1	1	1	5	Catalunya	1	4	4	4	1	1	1	1	1	No	No	0	0	0	0	0	0	2	1	0	0	8	2	48	58	3	3	3	2	0	2	1	6	0	1	6	1	6	1	0
596	2021-01-31 18:34:03	2021-01-31 18:44:23	00:10:20.957000	2	2	4	1	5	Catalunya	2	2	7	7	4	3	1	1	1	No	No	1	0	0	0	0	0	0	0	0	0	11	3	48	62	3	3	3	2	1	1	1	6	0	1	6	2	6	1	1
599	2021-01-31 18:52:48	2021-01-31 19:05:12	00:12:23.990000	1	2	1	1	5	Catalunya	2	1	4	4	2	1	1	2	1	No	Sí, por confinamiento por contacto estrecho o sospecha de COVID-19	1	0	0	0	0	0	0	0	0	0	25	14	37	76	2	2	1	3	2	3	4	6	5	4	5	2	6	3	3
601	2021-01-31 19:06:39	2021-01-31 19:22:09	00:15:30.960000	1	2	1	1	5	Catalunya	2	10	10	10	1	2	2	1	1	No	No	0	0	0	0	0	0	0	1	0	0	32	13	42	87	3	1	1	3	0	3	3	6	0	5	5	4	5	5	3
602	2021-01-31 19:07:26	2021-01-31 19:22:23	00:14:58.042000	1	2	1	1	5	Catalunya	2	3	10	10	1	1	1	1	1	No	No	0	1	0	0	0	0	0	0	0	0	18	6	32	56	2	3	2	2	1	4	0	6	1	1	2	1	5	1	3
603	2021-01-31 18:55:32	2021-01-31 19:33:18	00:37:46.013000	1	1	1	1	5	Catalunya	1	3	4	4	1	1	1	1	1	No	No	1	0	0	0	0	0	0	0	0	0	26	12	36	74	2	2	1	3	4	3	0	6	0	5	6	6	6	6	6
606	2021-01-31 20:06:47	2021-01-31 20:26:50	00:20:03.034000	1	2	4	1	5	Catalunya	2	2	7	7	4	3	1	1	1	No	No	1	0	0	0	0	0	0	0	0	0	35	8	31	74	2	1	2	3	4	5	4	4	0	2	5	6	1	3	1
609	2021-01-31 20:24:36	2021-01-31 20:36:46	00:12:11.030000	1	2	4	1	5	Catalunya	2	6	4	4	4	3	1	1	1	No	Sí, por confinamiento por contacto estrecho o sospecha de COVID-19	0	0	2	0	1	0	0	1	0	0	11	2	37	50	2	3	3	2	1	1	0	6	0	1	1	6	6	1	1
612	2021-01-31 20:02:44	2021-01-31 20:38:06	00:35:21.034000	2	2	1	1	5	Catalunya	2	2	2	2	2	2	2	1	1	No	No	1	0	0	0	0	0	0	0	0	0	41	12	36	89	2	1	1	3	4	6	3	6	2	4	3	5	6	5	2
613	2021-01-31 20:38:10	2021-01-31 20:43:48	00:05:37.997000	2	2	2	1	5	Catalunya	1	4	10	10	3	1	1	1	1	No	No	0	0	2	0	2	2	0	0	0	1	14	1	38	53	2	3	3	2	1	4	1	6	0	1	1	1	5	1	0
615	2021-01-31 21:02:59	2021-01-31 21:10:46	00:07:48.029000	2	2	1	1	5	Catalunya	2	2	10	10	1	2	2	2	1	No	Sí, por confinamiento por contacto estrecho o sospecha de COVID-19	1	0	0	0	0	0	0	0	0	0	19	9	30	58	1	3	2	2	3	2	0	6	0	1	3	3	6	3	4
620	2021-01-31 21:51:30	2021-01-31 22:05:05	00:13:35.962000	2	1	2	1	5	Catalunya	1	13	4	4	4	1	1	3	2	No	Sí, por confinamiento por contacto estrecho o sospecha de COVID-19	1	0	0	0	0	0	0	0	0	0	3	0	37	40	2	3	3	2	0	0	0	6	0	1	1	0	6	0	0
621	2021-01-31 22:04:39	2021-01-31 22:11:56	00:07:17.011000	2	2	3	1	5	Catalunya	2	3	13	14	4	2	2	3	2	No	Sí, por confinamiento por contacto estrecho o sospecha de COVID-19	0	2	2	2	0	2	2	0	0	2	48	22	35	105	2	1	1	3	5	5	6	6	2	5	5	6	4	6	6
622	2021-01-31 22:07:49	2021-01-31 22:12:50	00:05:01.018000	1	2	2	1	5	Catalunya	1	3	13	14	3	2	2	1	1	No	No	0	2	0	0	0	2	2	0	1	0	28	0	37	65	2	1	3	2	4	4	2	6	0	0	6	6	6	0	0
625	2021-01-31 22:23:40	2021-01-31 22:31:42	00:08:02.976000	1	2	1	1	5	Catalunya	2	10	4	4	3	2	2	1	1	No	No	0	0	0	0	2	0	0	0	0	0	16	7	33	56	2	3	2	2	2	3	2	6	1	1	3	1	3	1	2
626	2021-01-31 22:36:33	2021-01-31 22:43:00	00:06:26.986000	1	1	1	1	5	Catalunya	2	10	4	4	2	1	1	4	2	No	No	1	0	0	0	0	0	0	0	0	0	26	19	34	79	2	2	1	3	2	5	4	6	6	3	3	2	4	6	5
627	2021-01-31 22:55:12	2021-01-31 23:05:02	00:09:50.026000	1	2	3	1	5	Catalunya	2	8	2	2	4	2	2	2	1	No	Sí, por confinamiento por contacto estrecho o sospecha de COVID-19	1	0	0	0	0	0	0	0	0	0	19	2	41	62	3	3	3	2	2	5	1	6	1	1	6	1	6	0	0
628	2021-01-31 23:05:23	2021-01-31 23:13:10	00:07:46.992000	1	2	2	1	5	Catalunya	2	2	7	7	2	3	1	2	1	No	No	1	0	0	0	0	0	0	0	0	0	31	6	19	56	1	1	2	2	4	4	2	6	1	1	5	5	3	1	2
629	2021-02-01 00:26:30	2021-02-01 00:36:20	00:09:50.976000	2	1	4	1	5	Catalunya	1	2	7	7	4	1	1	1	1	No	No	1	0	0	0	0	0	0	0	0	0	54	28	30	112	1	1	1	3	6	6	6	6	6	6	6	6	6	6	6
630	2021-02-01 06:40:26	2021-02-01 06:47:10	00:06:45.043000	1	2	1	1	5	Catalunya	1	3	13	14	2	1	1	2	1	No	Sí, por confinamiento por contacto estrecho o sospecha de COVID-19	0	0	0	0	0	0	2	0	2	0	52	19	28	99	1	1	1	3	4	6	6	6	0	6	5	6	2	6	6
632	2021-02-01 07:30:59	2021-02-01 07:34:07	00:03:09.043000	1	1	1	1	5	Catalunya	2	6	7	7	1	2	2	1	1	No	No	1	0	0	0	0	0	0	0	0	0	37	17	42	96	3	1	1	3	2	5	4	6	4	3	5	4	5	3	3
633	2021-02-01 08:00:25	2021-02-01 08:06:20	00:05:55.968000	2	1	1	1	5	Catalunya	1	4	10	10	1	1	1	2	1	No	Sí, por confinamiento por contacto estrecho o sospecha de COVID-19	0	0	2	2	2	0	1	1	0	0	32	12	39	83	2	1	1	3	2	6	5	6	2	3	3	3	3	4	1
634	2021-02-01 08:00:16	2021-02-01 08:07:02	00:06:45.994000	2	1	3	1	5	Catalunya	1	17	7	7	4	2	2	3	2	No	Sí, por problemas de salud físicos	0	0	0	0	4	0	4	0	0	0	46	16	27	89	1	1	1	3	6	6	2	6	1	6	6	6	2	1	6
635	2021-02-01 08:00:53	2021-02-01 08:07:48	00:06:54.979000	2	2	1	1	5	Catalunya	1	4	4	4	1	1	1	1	1	No	No	1	0	0	0	0	0	0	0	0	0	44	1	46	91	3	1	3	3	6	6	6	6	0	1	6	6	6	0	0
638	2021-02-01 08:43:30	2021-02-01 08:49:38	00:06:07.027000	2	2	1	1	5	Catalunya	1	4	4	4	1	1	1	1	1	No	Sí, por confinamiento por contacto estrecho o sospecha de COVID-19	1	0	0	0	0	0	0	0	0	0	22	4	33	59	2	2	3	2	1	3	3	6	1	1	4	3	3	0	1
639	2021-02-01 09:02:52	2021-02-01 09:07:48	00:04:56.006000	1	2	1	1	5	Catalunya	1	3	4	4	1	2	2	1	1	No	Sí, por confinamiento por contacto estrecho o sospecha de COVID-19	0	2	2	2	0	2	2	0	2	0	19	4	35	58	2	3	3	2	2	2	3	6	0	2	6	3	6	2	2
640	2021-02-01 09:08:16	2021-02-01 09:16:08	00:07:52.003000	1	1	3	1	5	Catalunya	1	3	7	7	2	2	2	3	2	No	Sí, por problemas de salud físicos	0	0	0	4	4	4	0	0	0	0	18	13	44	75	3	3	1	3	1	6	1	6	3	1	3	5	6	1	5
641	2021-02-01 09:12:20	2021-02-01 09:18:05	00:05:44.995000	2	1	4	1	5	Catalunya	1	4	7	7	4	2	2	3	2	No	Sí, por problemas de salud físicos	0	4	4	4	4	0	0	0	0	0	0	12	37	49	2	3	1	2	0	0	0	6	0	0	0	0	6	6	6
642	2021-02-01 09:13:57	2021-02-01 09:20:03	00:06:07.027000	1	1	3	1	5	Catalunya	1	3	4	4	3	1	1	1	1	No	No	1	0	0	0	0	0	0	0	0	0	15	2	45	62	3	3	3	2	1	1	0	6	0	3	3	1	6	1	1
643	2021-02-01 09:36:57	2021-02-01 09:45:24	00:08:28.032000	2	1	4	1	5	Catalunya	2	2	7	7	4	2	2	1	1	No	Sí, por problemas de salud físicos	0	0	2	0	2	2	2	1	0	0	52	26	45	123	3	1	1	3	6	6	6	6	5	5	6	6	6	5	5
644	2021-02-01 09:36:48	2021-02-01 09:48:25	00:11:36.989000	2	2	1	1	5	Catalunya	2	11	4	4	1	1	1	2	1	No	No	0	2	0	2	0	0	0	1	0	0	22	8	44	74	3	2	2	3	2	5	5	6	5	1	6	0	6	1	1
645	2021-02-01 09:43:17	2021-02-01 09:48:46	00:05:29.011000	1	2	2	1	5	Catalunya	2	1	10	10	3	1	1	2	1	No	Sí, por confinamiento por contacto estrecho o sospecha de COVID-19	0	2	0	0	0	0	0	0	0	0	45	15	19	79	1	1	1	3	6	5	6	3	4	6	3	6	3	3	2
647	2021-02-01 09:58:35	2021-02-01 10:05:40	00:07:05.002000	2	2	1	1	5	Catalunya	2	1	10	10	1	1	1	1	1	No	No	0	0	0	0	0	1	0	0	1	0	23	1	44	68	3	2	3	3	3	4	4	6	0	0	6	5	6	1	0
648	2021-02-01 09:51:54	2021-02-01 10:19:29	00:27:36.029000	1	2	1	1	5	Catalunya	1	3	1	14	1	2	2	3	2	No	Sí, por problemas de salud físicos	0	4	0	4	0	4	4	4	4	0	37	11	43	91	3	1	1	3	0	6	6	4	0	0	6	5	6	6	5
649	2021-02-01 10:20:04	2021-02-01 10:32:57	00:12:53.021000	2	2	3	1	5	Catalunya	1	4	4	4	4	1	1	1	1	No	No	0	1	0	0	0	0	0	0	0	0	9	0	42	51	3	3	3	2	1	1	1	6	0	1	6	1	6	0	0
652	2021-02-01 10:56:25	2021-02-01 11:05:04	00:08:40.042000	2	2	2	1	5	Catalunya	1	1	10	10	3	1	1	2	1	No	Sí, por confinamiento por contacto estrecho o sospecha de COVID-19	0	0	0	0	1	1	0	1	1	0	21	4	43	68	3	2	3	3	0	5	3	6	1	3	3	2	5	1	1
654	2021-02-01 11:01:57	2021-02-01 11:10:40	00:08:42.029000	1	2	1	1	5	Catalunya	1	6	4	4	1	1	1	3	2	Sí, anteriormente estaba sin actividad laboral	Sí, por confinamiento por contacto estrecho o sospecha de COVID-19	0	3	0	0	0	3	3	0	0	0	26	7	40	73	2	2	2	3	0	4	1	6	0	5	6	3	5	3	3
655	2021-02-01 11:00:20	2021-02-01 11:15:38	00:15:16.963000	1	2	2	1	5	Catalunya	1	2	2	2	4	2	2	3	2	No	Sí, por confinamiento por contacto estrecho o sospecha de COVID-19	0	0	0	0	4	0	0	0	0	0	22	18	33	73	2	2	1	3	2	5	2	1	5	5	6	1	6	6	6
656	2021-02-01 11:08:50	2021-02-01 11:16:56	00:08:06	2	2	1	1	5	Catalunya	2	6	4	4	2	2	2	2	1	No	No	0	0	1	0	0	0	0	0	0	0	13	6	45	64	3	3	2	2	3	3	3	6	0	0	6	0	6	3	3
657	2021-02-01 11:13:20	2021-02-01 11:18:51	00:05:30.998000	2	2	1	1	5	Catalunya	2	2	2	2	3	2	2	1	1	No	No	0	2	0	0	0	0	0	1	0	2	22	15	33	70	2	2	1	3	2	3	1	6	4	5	4	4	3	2	1
659	2021-02-01 12:01:25	2021-02-01 12:06:07	00:04:40.973000	1	1	2	1	5	Catalunya	2	3	4	4	3	2	2	2	1	No	No	1	0	0	0	0	0	0	0	0	0	23	9	33	65	2	2	2	2	4	2	0	6	0	1	0	3	6	6	1
662	2021-02-01 12:32:06	2021-02-01 12:36:19	00:04:12.979000	1	2	1	1	5	Catalunya	2	7	2	2	1	2	2	1	1	No	No	0	0	1	0	1	0	2	0	0	0	17	18	35	70	2	3	1	3	1	4	1	4	5	1	2	4	6	5	4
664	2021-02-01 12:35:37	2021-02-01 12:40:23	00:04:45.984000	2	2	1	1	5	Catalunya	2	2	2	2	1	1	1	3	2	Sí, por primera vez en mi vida	Sí, por confinamiento por contacto estrecho o sospecha de COVID-19	1	0	0	0	0	0	0	0	0	0	19	6	37	62	2	3	2	2	1	5	3	4	0	0	5	1	5	1	2
665	2021-02-01 12:37:23	2021-02-01 12:41:53	00:04:30	1	2	1	1	5	Catalunya	2	6	2	2	1	1	1	3	2	Sí, por primera vez en mi vida	No	0	1	0	0	0	0	0	1	0	0	8	7	34	49	2	3	2	2	1	2	1	4	1	1	1	1	6	1	4
666	2021-02-01 12:36:29	2021-02-01 12:42:59	00:06:28.973000	1	2	2	1	5	Catalunya	2	6	7	7	2	2	2	3	2	No	Sí, por problemas de salud físicos	0	3	0	3	0	3	3	0	3	0	33	12	43	88	3	1	1	3	1	6	1	6	4	5	5	5	6	4	4
667	2021-02-01 12:29:12	2021-02-01 12:45:05	00:15:52.992000	2	2	1	1	5	Catalunya	1	11	4	4	3	1	1	1	1	No	No	0	0	0	0	0	1	0	0	0	0	32	14	25	71	1	1	1	3	4	3	2	3	4	6	4	3	2	4	2
668	2021-02-01 12:41:36	2021-02-01 12:50:51	00:09:15.034000	1	1	1	1	5	Catalunya	2	6	4	4	1	2	2	2	1	No	Sí, por confinamiento por contacto estrecho o sospecha de COVID-19	0	0	2	0	0	0	0	0	0	0	23	14	36	73	2	2	1	3	2	2	2	2	6	2	2	1	6	3	1
669	2021-02-01 12:52:46	2021-02-01 12:56:50	00:04:05.030000	1	2	1	1	5	Catalunya	2	7	2	2	1	2	2	1	1	No	No	0	0	0	0	0	0	0	0	0	2	15	3	44	62	3	3	3	2	1	2	1	6	0	1	6	1	6	0	3
671	2021-02-01 12:54:59	2021-02-01 13:00:02	00:05:03.005000	2	2	2	1	5	Catalunya	1	3	4	4	4	1	1	2	1	No	Sí, por confinamiento por contacto estrecho o sospecha de COVID-19	0	0	2	0	0	1	2	1	1	0	45	3	40	88	2	1	3	3	3	6	5	6	0	3	6	6	5	2	1
675	2021-02-01 12:58:19	2021-02-01 13:04:25	00:06:05.990000	2	1	2	1	5	Catalunya	2	3	4	4	3	2	2	3	2	No	Sí, por problemas de salud físicos	1	0	0	0	0	0	0	0	0	0	3	2	48	53	3	3	3	2	0	1	1	6	0	0	6	0	6	1	0
678	2021-02-01 13:05:38	2021-02-01 13:09:44	00:04:05.981000	2	2	2	1	5	Catalunya	1	4	4	4	3	1	1	4	2	No	No	0	2	0	0	1	1	1	0	1	0	24	11	23	58	1	2	1	2	3	3	3	4	6	3	3	3	2	1	1
679	2021-02-01 13:01:08	2021-02-01 13:10:55	00:09:47.002000	1	1	2	1	5	Catalunya	1	1	4	4	3	1	1	1	1	No	No	0	1	0	0	0	0	1	0	0	0	25	6	29	60	1	2	2	2	2	1	2	4	0	4	5	3	5	1	4
683	2021-02-01 13:11:42	2021-02-01 13:16:47	00:05:06.029000	2	2	3	1	5	Catalunya	2	2	7	7	4	1	1	2	1	No	Sí, por confinamiento por contacto estrecho o sospecha de COVID-19	0	2	0	0	0	0	2	0	0	0	46	20	28	94	1	1	1	3	5	5	5	4	4	5	4	6	3	5	5
685	2021-02-01 13:03:55	2021-02-01 13:18:40	00:14:43.958000	1	2	1	1	5	Catalunya	1	3	10	10	1	1	1	3	2	No	Sí, por problemas de salud físicos	0	0	0	0	0	0	2	0	0	0	21	7	29	57	1	2	2	2	2	5	3	6	0	2	3	3	3	2	3
687	2021-02-01 13:18:02	2021-02-01 13:24:58	00:06:54.979000	2	2	3	1	5	Catalunya	2	16	4	4	4	1	1	1	1	No	No	1	0	0	0	0	0	0	0	0	0	9	1	48	58	3	3	3	2	1	2	1	6	0	1	6	1	6	0	1
688	2021-02-01 13:18:18	2021-02-01 13:26:27	00:08:09.974000	1	2	2	1	5	Catalunya	1	4	4	4	3	2	2	4	2	No	Sí, por confinamiento por contacto estrecho o sospecha de COVID-19	0	1	2	0	2	1	1	1	2	0	34	13	33	80	2	1	1	3	2	4	4	6	2	5	6	4	4	4	4
689	2021-02-01 13:16:31	2021-02-01 13:26:36	00:10:06.010000	1	1	1	1	5	Catalunya	1	3	4	4	1	2	2	3	2	No	Sí, por confinamiento por contacto estrecho o sospecha de COVID-19	1	0	0	0	0	0	0	0	0	0	31	11	35	77	2	1	1	3	5	4	2	3	1	0	4	5	6	4	3
690	2021-02-01 13:23:21	2021-02-01 13:27:49	00:04:28.013000	1	2	1	1	5	Catalunya	2	2	13	14	1	2	2	1	1	No	No	0	0	0	0	2	2	2	0	2	0	43	25	39	107	2	1	1	3	3	5	5	6	5	6	5	5	4	6	6
692	2021-02-01 13:21:45	2021-02-01 13:29:06	00:07:20.986000	1	1	1	1	5	Catalunya	2	3	4	4	1	1	1	1	1	No	No	0	2	0	0	0	0	2	0	0	0	27	18	38	83	2	1	1	3	2	4	3	4	4	3	4	3	6	6	6
693	2021-02-01 13:24:55	2021-02-01 13:32:12	00:07:17.962000	1	2	1	1	5	Catalunya	1	4	4	4	1	1	1	4	2	Sí, anteriormente estaba sin actividad laboral	No	0	2	0	2	2	2	2	0	0	0	33	21	35	89	2	1	1	3	3	4	2	6	6	5	5	5	6	6	6
694	2021-02-01 13:29:47	2021-02-01 13:34:38	00:04:50.995000	1	1	1	1	5	Catalunya	1	4	4	4	1	1	1	2	1	No	Sí, por confinamiento por contacto estrecho o sospecha de COVID-19	1	0	0	0	0	0	0	0	0	0	13	7	34	54	2	3	2	2	3	1	2	6	1	0	2	0	5	3	1
695	2021-02-01 13:28:03	2021-02-01 13:35:01	00:06:59.040000	1	2	4	1	5	Catalunya	2	8	2	2	3	2	2	1	1	No	No	1	0	0	0	0	0	0	0	0	0	22	1	41	64	3	2	3	2	6	6	6	6	0	1	1	1	5	0	0
698	2021-02-01 13:30:03	2021-02-01 13:39:15	00:09:12.010000	2	1	4	1	5	Catalunya	2	11	7	7	4	1	1	3	2	No	Sí, por problemas de salud físicos	0	3	0	3	3	3	3	0	0	0	12	14	37	63	2	3	1	2	1	2	1	6	1	2	0	1	5	6	2
699	2021-02-01 13:25:05	2021-02-01 13:41:50	00:16:45.005000	2	2	2	1	5	Catalunya	1	3	1	14	1	1	1	1	1	Sí, por primera vez en mi vida	No	1	0	0	0	0	0	0	0	0	0	0	0	0	0	1	3	3	1	#NULL!	#NULL!	#NULL!	#NULL!	#NULL!	#NULL!	#NULL!	#NULL!	#NULL!	#NULL!	#NULL!
700	2021-02-01 13:31:16	2021-02-01 13:42:06	00:10:49.037000	1	2	3	1	5	Catalunya	1	6	11	14	1	1	1	3	2	No	Sí, por problemas de salud físicos	0	4	0	0	0	0	4	4	0	0	16	20	41	77	3	3	1	3	1	3	3	6	1	1	6	0	6	6	6
701	2021-02-01 13:38:14	2021-02-01 13:43:57	00:05:43.958000	1	2	1	1	5	Catalunya	1	4	4	4	2	1	1	1	1	No	No	1	0	0	0	0	0	0	0	0	0	13	2	35	50	2	3	3	2	2	3	1	6	0	1	1	1	5	1	1
702	2021-02-01 13:40:49	2021-02-01 13:44:34	00:03:44.986000	2	2	1	1	5	Catalunya	1	4	4	4	1	1	1	2	1	No	Sí, por confinamiento por contacto estrecho o sospecha de COVID-19	0	0	1	0	0	0	0	0	0	0	31	5	43	79	3	1	3	3	5	4	3	6	1	5	6	4	6	0	0
704	2021-02-01 13:45:40	2021-02-01 13:55:10	00:09:29.030000	1	2	2	1	5	Catalunya	1	3	1	14	1	2	2	1	1	No	No	0	0	2	0	0	0	2	0	0	0	24	12	13	49	1	2	1	2	3	3	3	4	0	3	0	3	1	6	6
711	2021-02-01 14:10:09	2021-02-01 14:20:43	00:10:35.040000	2	1	2	1	5	Catalunya	1	4	4	4	3	1	1	1	1	No	No	0	0	0	0	0	0	0	1	0	0	9	3	48	60	3	3	3	2	1	2	1	6	0	1	6	1	6	1	1
713	2021-02-01 14:20:18	2021-02-01 14:24:29	00:04:10.992000	1	2	2	1	5	Catalunya	1	3	4	4	3	2	2	1	1	No	No	0	0	0	0	2	2	1	0	0	0	44	16	28	88	1	1	1	3	4	6	5	6	3	5	5	6	6	6	6
719	2021-02-01 14:24:38	2021-02-01 14:31:52	00:07:13.037000	1	2	3	1	5	Catalunya	2	1	4	4	4	1	1	3	2	No	Sí, por confinamiento por contacto estrecho o sospecha de COVID-19	0	0	0	0	4	0	4	0	0	0	7	1	39	47	2	3	3	2	1	1	0	6	0	0	1	1	6	0	0
720	2021-02-01 14:21:07	2021-02-01 14:32:42	00:11:35.002000	1	2	2	1	5	Catalunya	2	8	7	7	2	2	2	2	1	No	Sí, por confinamiento por contacto estrecho o sospecha de COVID-19	0	2	0	0	0	2	0	0	0	0	38	15	25	78	1	1	1	3	3	5	5	3	3	5	2	5	5	6	5
722	2021-02-01 14:31:31	2021-02-01 14:38:27	00:06:54.979000	1	1	2	2	5	Catalunya	2	3	1	14	3	1	1	3	2	No	Sí, por problemas de salud físicos	0	4	0	4	0	0	4	0	0	0	18	9	44	71	3	3	2	3	4	5	5	6	0	0	5	0	5	5	4
723	2021-02-01 14:37:40	2021-02-01 14:42:01	00:04:21.014000	2	2	2	1	5	Catalunya	2	7	7	7	3	2	2	1	1	No	No	0	0	2	0	0	0	2	0	0	0	44	6	35	85	2	1	2	3	5	5	5	6	4	3	1	5	6	0	2
726	2021-02-01 14:40:48	2021-02-01 14:48:47	00:07:57.965000	2	2	3	1	5	Catalunya	1	3	9	14	2	1	1	1	1	No	Sí, por problemas de salud físicos	1	0	0	0	0	0	0	0	0	0	43	1	37	81	2	1	3	3	3	6	5	4	0	5	6	5	5	0	0
727	2021-02-01 14:49:05	2021-02-01 14:52:46	00:03:41.011000	1	1	2	1	5	Catalunya	1	4	4	4	1	1	1	1	1	No	No	0	0	0	2	0	0	0	0	0	0	6	3	33	42	2	3	3	2	1	1	1	6	2	1	1	1	3	1	0
729	2021-02-01 14:50:30	2021-02-01 14:56:34	00:06:04.003000	2	2	1	1	5	Catalunya	1	4	4	4	2	1	1	3	2	No	Sí, por problemas de salud físicos	0	4	0	4	0	0	0	0	2	0	34	0	47	81	3	1	3	3	4	5	5	6	0	0	6	5	6	0	0
730	2021-02-01 14:51:50	2021-02-01 14:57:37	00:05:46.032000	1	2	4	1	5	Catalunya	2	8	7	7	4	2	2	1	1	No	No	1	0	0	0	0	0	0	0	0	0	4	0	48	52	3	3	3	2	1	1	0	6	0	0	6	0	6	0	0
734	2021-02-01 15:09:45	2021-02-01 15:15:56	00:06:09.965000	2	2	2	1	5	Catalunya	1	10	4	4	3	1	1	3	2	No	Sí, por confinamiento por contacto estrecho o sospecha de COVID-19	0	4	0	4	0	0	4	4	0	0	35	8	34	77	2	1	2	3	5	4	3	4	2	4	6	4	6	3	2
735	2021-02-01 15:13:21	2021-02-01 15:19:37	00:06:14.976000	1	2	1	1	5	Catalunya	1	3	4	4	1	2	2	2	1	No	Sí, por confinamiento por contacto estrecho o sospecha de COVID-19	0	0	2	0	2	2	0	0	0	0	29	8	41	78	3	1	2	3	4	5	4	6	3	0	6	1	6	0	0
739	2021-02-01 15:19:25	2021-02-01 15:25:48	00:06:21.974000	1	2	3	1	5	Catalunya	1	2	2	2	4	2	2	1	1	No	No	1	0	0	0	0	0	0	0	0	0	36	19	45	100	3	1	1	3	2	3	3	6	5	5	6	5	6	6	5
740	2021-02-01 15:25:36	2021-02-01 15:32:01	00:06:26.035000	2	2	2	1	5	Catalunya	1	7	7	7	3	1	1	2	1	No	Sí, por problemas de salud físicos	1	0	0	0	0	0	0	0	0	0	30	8	34	72	2	1	2	3	5	4	4	6	4	0	6	5	6	0	4
741	2021-02-01 14:46:21	2021-02-01 15:39:34	00:53:12.998000	2	2	2	1	5	Catalunya	1	4	4	4	3	1	1	1	1	No	No	1	0	0	0	0	0	0	0	0	0	24	5	37	66	2	2	3	2	4	4	0	6	0	2	6	2	6	0	2
745	2021-02-01 15:34:01	2021-02-01 15:47:52	00:13:50.995000	1	2	3	1	5	Catalunya	2	2	13	14	1	2	2	3	2	Sí, por primera vez en mi vida	Sí, por confinamiento por contacto estrecho o sospecha de COVID-19	0	3	0	3	0	1	3	0	0	0	30	4	39	73	2	1	3	3	3	3	3	6	0	3	3	4	6	1	1
746	2021-02-01 15:45:08	2021-02-01 15:49:14	00:04:05.981000	2	1	1	1	5	Catalunya	2	1	2	2	3	2	2	1	1	No	No	1	0	0	0	0	0	0	0	0	0	18	9	29	56	1	3	2	2	4	2	1	2	1	0	4	3	5	4	2
747	2021-02-01 15:43:08	2021-02-01 15:49:17	00:06:09.014000	2	2	4	1	5	Catalunya	2	1	7	7	4	2	2	1	1	No	No	0	2	2	0	2	2	2	0	2	0	30	5	34	69	2	1	3	3	5	5	4	6	1	1	1	4	5	1	1
750	2021-02-01 16:17:13	2021-02-01 16:21:01	00:03:48.960000	2	2	2	1	5	Catalunya	2	3	4	4	3	2	2	1	1	No	No	0	0	0	0	0	0	0	1	2	0	10	1	39	50	2	3	3	2	0	5	4	6	1	0	4	0	5	0	0
752	2021-02-01 16:18:49	2021-02-01 16:26:01	00:07:10.963000	1	2	2	1	5	Catalunya	1	3	4	4	3	2	2	3	2	No	Sí, por confinamiento por contacto estrecho o sospecha de COVID-19	1	0	0	0	0	0	0	0	0	0	21	3	40	64	2	2	3	2	3	5	5	6	1	3	6	2	5	1	1
753	2021-02-01 16:13:53	2021-02-01 16:26:55	00:13:02.957000	2	2	4	1	5	Catalunya	2	2	7	7	4	2	2	2	1	No	Sí, por confinamiento por contacto estrecho o sospecha de COVID-19	0	0	2	0	0	0	0	0	1	0	16	7	35	58	2	3	2	2	5	1	1	6	3	1	1	1	5	2	1
754	2021-02-01 16:23:57	2021-02-01 16:28:39	00:04:42.010000	1	2	4	1	5	Catalunya	1	1	7	7	4	2	2	2	1	No	No	0	0	0	0	0	1	0	0	0	0	6	0	27	33	1	3	3	1	0	1	0	1	0	0	1	1	4	0	0
762	2021-02-01 16:56:23	2021-02-01 17:01:02	00:04:38.986000	2	1	5	1	5	Catalunya	1	4	7	7	4	1	1	1	1	No	No	1	0	0	0	0	0	0	0	0	0	33	16	37	86	2	1	1	3	4	4	3	4	3	4	5	5	6	4	3
769	2021-02-01 17:21:54	2021-02-01 17:25:56	00:04:02.957000	1	2	1	1	5	Catalunya	1	3	4	4	1	1	1	2	1	No	No	0	2	0	0	2	2	2	0	2	0	39	16	34	89	2	1	1	3	3	6	6	4	2	4	3	5	6	3	6
770	2021-02-01 17:24:22	2021-02-01 17:32:21	00:07:57.965000	1	2	2	1	5	Catalunya	2	14	7	7	3	1	1	1	1	No	No	0	0	0	0	1	0	1	0	1	0	37	17	35	89	2	1	1	3	5	4	3	6	5	6	3	3	4	4	2
773	2021-02-01 17:56:55	2021-02-01 18:03:25	00:06:30.010000	1	2	3	1	5	Catalunya	1	3	2	2	2	2	2	3	2	No	Sí, por confinamiento por contacto estrecho o sospecha de COVID-19	0	4	0	4	4	4	4	0	4	0	8	0	36	44	2	3	3	2	1	1	0	6	0	1	1	1	6	0	0
775	2021-02-01 18:12:32	2021-02-01 18:22:28	00:09:57.024000	1	1	2	1	5	Catalunya	2	4	4	4	2	1	1	2	1	No	Sí, por confinamiento por contacto estrecho o sospecha de COVID-19	1	0	0	0	0	0	0	0	0	0	10	6	48	64	3	3	2	2	0	1	1	6	0	0	6	3	6	1	2
776	2021-02-01 18:12:11	2021-02-01 18:22:30	00:10:18.970000	2	2	1	1	5	Catalunya	2	4	4	4	3	1	1	2	1	No	Sí, por confinamiento por contacto estrecho o sospecha de COVID-19	1	0	0	0	0	0	0	0	0	0	10	6	48	64	3	3	2	2	0	1	1	6	0	0	6	3	6	1	2
778	2021-02-01 18:25:46	2021-02-01 18:37:13	00:11:28.003000	1	2	1	1	5	Catalunya	1	10	4	4	1	2	2	2	1	No	Sí, por confinamiento por contacto estrecho o sospecha de COVID-19	0	2	0	0	0	2	0	0	0	0	23	7	29	59	1	2	2	2	4	4	4	6	4	2	2	3	4	1	2
779	2021-02-01 18:31:35	2021-02-01 18:40:57	00:09:22.982000	1	2	1	1	5	Catalunya	2	1	4	4	3	2	2	2	1	No	Sí, por confinamiento por contacto estrecho o sospecha de COVID-19	0	0	0	0	1	1	0	0	0	0	24	3	34	61	2	2	3	2	1	5	5	6	1	5	2	1	6	1	0
782	2021-02-01 18:51:24	2021-02-01 18:57:20	00:05:55.968000	2	2	3	1	5	Catalunya	1	4	9	14	4	3	1	1	1	No	No	0	0	0	0	0	0	0	0	0	2	7	3	45	55	3	3	3	2	1	1	1	6	0	0	3	1	6	1	1
783	2021-02-01 18:57:22	2021-02-01 19:02:49	00:05:27.974000	1	2	1	1	5	Catalunya	2	2	2	2	1	2	2	3	2	Sí, por primera vez en mi vida	Sí, por confinamiento por contacto estrecho o sospecha de COVID-19	0	0	2	2	0	0	1	1	0	0	17	1	29	47	1	3	3	2	1	6	3	4	0	1	1	1	1	1	0
784	2021-02-01 19:03:08	2021-02-01 19:05:01	00:01:53.011000	2	2	2	1	5	Catalunya	1	4	4	4	3	1	1	1	1	No	No	1	0	0	0	0	0	0	0	0	0	0	0	0	0	1	3	3	1	#NULL!	#NULL!	#NULL!	#NULL!	#NULL!	#NULL!	#NULL!	#NULL!	#NULL!	#NULL!	#NULL!
785	2021-02-01 19:10:29	2021-02-01 19:17:32	00:07:03.014000	2	2	4	1	5	Catalunya	1	3	2	2	4	2	2	1	1	No	No	0	2	2	0	0	1	2	1	0	0	52	11	28	91	1	1	1	3	6	6	6	6	5	6	6	6	5	0	0
786	2021-02-01 19:17:10	2021-02-01 19:21:52	00:04:42.010000	2	2	2	1	5	Catalunya	2	3	4	4	3	2	2	3	2	No	Sí, por confinamiento por contacto estrecho o sospecha de COVID-19	0	4	4	4	0	0	0	0	0	0	42	8	22	72	1	1	2	3	5	6	6	4	0	5	4	5	5	4	4
787	2021-02-01 19:26:15	2021-02-01 19:29:46	00:03:30.989000	1	2	3	1	5	Catalunya	2	6	1	14	4	2	2	3	2	No	Sí, por problemas de salud físicos	0	2	0	0	1	1	0	1	0	0	26	14	33	73	2	2	1	3	2	4	4	6	3	2	2	2	6	3	3
788	2021-02-01 18:40:12	2021-02-01 19:35:58	00:55:44.976000	1	2	3	1	5	Catalunya	2	2	7	7	4	2	2	1	1	No	No	0	0	0	0	0	1	0	1	1	0	36	20	36	92	2	1	1	3	5	5	6	4	5	5	6	5	4	5	5
789	2021-02-01 19:30:36	2021-02-01 19:37:22	00:06:45.994000	1	1	1	1	5	Catalunya	1	3	4	4	1	2	2	3	2	No	Sí, por confinamiento por contacto estrecho o sospecha de COVID-19	1	0	0	0	0	0	0	0	0	0	12	12	40	64	2	3	1	2	1	2	1	6	0	0	2	1	6	5	6
790	2021-02-01 19:30:43	2021-02-01 19:39:34	00:08:51.014000	1	2	2	1	5	Catalunya	1	2	2	2	1	1	1	1	1	No	No	1	0	0	0	0	0	0	0	0	0	19	2	33	54	2	3	3	2	1	1	2	6	1	3	1	1	0	1	0
792	2021-02-01 19:43:02	2021-02-01 19:46:55	00:03:53.021000	1	2	5	1	5	Catalunya	1	6	6	14	4	3	1	1	1	No	No	1	0	0	0	0	0	0	0	0	0	0	0	0	0	1	3	3	1	#NULL!	#NULL!	#NULL!	#NULL!	#NULL!	#NULL!	#NULL!	#NULL!	#NULL!	#NULL!	#NULL!
793	2021-02-01 19:43:05	2021-02-01 19:52:05	00:09:01.037000	2	1	5	1	5	Catalunya	1	4	7	7	4	1	1	1	1	No	No	1	0	0	0	0	0	0	0	0	0	0	2	35	37	2	3	3	2	0	0	0	2	0	0	2	0	4	0	0
794	2021-02-01 19:45:12	2021-02-01 19:53:15	00:08:02.976000	2	2	4	1	5	Catalunya	2	2	7	7	4	3	1	1	1	No	No	1	0	0	0	0	0	0	0	0	0	37	21	38	96	2	1	1	3	3	6	5	6	5	3	5	5	6	5	5
796	2021-02-01 20:03:26	2021-02-01 20:10:17	00:06:52.042000	1	2	3	1	5	Catalunya	1	11	4	4	4	1	1	1	1	No	No	0	0	0	0	1	0	1	0	0	0	50	15	23	88	1	1	1	3	6	6	6	6	3	5	5	6	3	3	3
797	2021-02-01 20:02:25	2021-02-01 20:13:27	00:11:00.960000	2	2	2	1	5	Catalunya	1	3	4	4	3	2	2	1	1	No	No	0	0	0	0	0	0	0	1	0	0	35	12	39	86	2	1	1	3	4	5	5	4	5	4	5	4	6	3	1
798	2021-02-01 20:08:17	2021-02-01 20:14:32	00:06:14.976000	1	2	3	1	5	Catalunya	2	3	10	10	4	1	1	1	1	No	No	0	0	0	0	0	2	0	0	0	0	0	0	0	0	1	3	3	1	#NULL!	#NULL!	#NULL!	#NULL!	#NULL!	#NULL!	#NULL!	#NULL!	#NULL!	#NULL!	#NULL!
800	2021-02-01 20:15:36	2021-02-01 20:22:41	00:07:03.965000	1	1	1	1	5	Catalunya	1	8	13	14	2	2	2	3	2	No	Sí, por confinamiento por contacto estrecho o sospecha de COVID-19	0	4	0	4	4	4	4	0	0	0	49	30	23	102	1	1	1	3	6	6	6	6	6	6	2	6	3	6	6
801	2021-02-01 20:19:05	2021-02-01 20:26:38	00:07:34.032000	2	2	3	1	5	Catalunya	1	3	4	4	4	2	2	3	2	No	Sí, por confinamiento por contacto estrecho o sospecha de COVID-19	0	4	4	3	0	4	4	0	0	0	12	1	48	61	3	3	3	2	1	5	1	6	0	0	6	2	6	1	0
802	2021-02-01 20:21:58	2021-02-01 20:28:02	00:06:04.003000	2	2	2	1	5	Catalunya	1	3	4	4	3	2	2	3	2	No	Sí, por confinamiento por contacto estrecho o sospecha de COVID-19	0	4	0	4	4	0	0	0	0	0	45	9	33	87	2	1	2	3	6	6	4	4	5	5	6	6	3	1	1
803	2021-02-01 20:23:54	2021-02-01 20:28:05	00:04:10.992000	1	1	2	1	5	Catalunya	1	2	13	14	4	2	2	1	1	No	No	1	0	0	0	0	0	0	0	0	0	35	19	29	83	1	1	1	3	3	6	5	4	4	1	6	5	3	4	3
804	2021-02-01 20:23:51	2021-02-01 20:29:22	00:05:30.998000	1	2	2	1	5	Catalunya	1	3	9	14	3	2	2	1	1	No	No	0	0	0	0	0	2	2	0	0	0	28	17	25	70	1	1	1	3	3	5	3	4	5	2	5	5	2	4	4
809	2021-02-01 20:38:55	2021-02-01 20:44:10	00:05:15.965000	1	2	1	1	5	Catalunya	1	3	1	14	3	2	2	1	1	No	Sí, por problemas de salud físicos	0	2	2	0	0	2	1	0	2	0	44	24	33	101	2	1	1	3	3	6	5	6	3	4	4	5	6	5	6
810	2021-02-01 20:42:01	2021-02-01 20:44:52	00:02:50.986000	1	2	2	1	5	Catalunya	1	4	4	4	3	1	1	1	1	No	No	1	0	0	0	0	0	0	0	0	0	11	0	35	46	2	3	3	2	2	2	2	6	0	0	3	1	3	0	0
811	2021-02-01 20:39:37	2021-02-01 20:44:54	00:05:17.002000	2	2	2	1	5	Catalunya	2	2	2	2	3	2	2	2	1	No	Sí, por confinamiento por contacto estrecho o sospecha de COVID-19	0	2	2	0	0	0	2	0	0	0	38	9	44	91	3	1	2	3	4	5	6	6	3	5	6	5	6	2	2
812	2021-02-01 20:42:59	2021-02-01 20:49:29	00:06:28.973000	2	2	3	1	5	Catalunya	1	12	7	7	4	1	1	1	1	No	No	0	2	0	0	0	2	0	0	0	0	20	6	47	73	3	2	2	3	1	3	1	6	1	3	6	3	6	2	2
813	2021-02-01 20:45:09	2021-02-01 20:51:26	00:06:16.013000	2	2	4	1	5	Catalunya	2	2	7	7	4	3	1	1	1	No	No	0	0	1	0	0	2	2	0	0	0	36	13	38	87	2	1	1	3	3	5	5	6	1	3	6	5	5	5	5
814	2021-02-01 20:46:52	2021-02-01 20:54:39	00:07:46.042000	1	2	3	1	5	Catalunya	2	1	2	2	4	2	2	2	1	Sí, anteriormente estaba sin actividad laboral	Sí, por confinamiento por contacto estrecho o sospecha de COVID-19	0	0	2	2	1	2	2	0	2	0	24	2	34	60	2	2	3	2	1	6	5	6	0	2	1	2	6	1	1
815	2021-02-01 20:44:59	2021-02-01 20:54:39	00:09:41.040000	1	1	2	1	5	Catalunya	1	6	2	2	1	2	2	1	1	Sí, por primera vez en mi vida	No	1	0	0	0	0	0	0	0	0	0	11	0	42	53	3	3	3	2	0	5	4	4	0	0	5	2	6	0	0
816	2021-02-01 20:51:19	2021-02-01 20:55:23	00:04:03.994000	2	1	4	1	5	Catalunya	1	3	7	7	4	2	2	1	1	No	No	1	0	0	0	0	0	0	0	0	0	17	4	47	68	3	3	3	3	1	4	2	6	0	0	6	3	6	2	2
817	2021-02-01 20:52:34	2021-02-01 20:58:18	00:05:44.995000	1	2	3	1	5	Catalunya	2	2	7	7	4	2	2	3	2	No	No	1	0	0	0	0	0	0	0	0	0	39	10	34	83	2	1	1	3	4	6	5	6	3	3	3	6	5	3	2
818	2021-02-01 20:53:40	2021-02-01 20:58:24	00:04:45.034000	1	2	4	1	5	Catalunya	2	2	7	7	4	2	2	1	1	No	No	1	0	0	0	0	0	0	0	0	0	22	0	29	51	1	2	3	2	1	4	5	6	0	0	3	3	3	0	0
819	2021-02-01 20:53:29	2021-02-01 20:59:04	00:05:34.973000	1	2	2	1	5	Catalunya	2	1	2	2	3	2	2	1	1	No	No	0	0	0	0	0	0	0	0	0	2	35	1	35	71	2	1	3	3	5	5	6	6	0	4	5	4	6	0	0
820	2021-02-01 20:52:46	2021-02-01 21:00:59	00:08:14.035000	2	2	3	1	5	Catalunya	2	10	13	14	4	1	1	3	2	No	Sí, por confinamiento por contacto estrecho o sospecha de COVID-19	0	4	0	4	1	1	4	0	0	0	35	8	23	66	1	1	2	2	2	5	4	4	2	3	3	4	2	1	1
822	2021-02-01 20:58:18	2021-02-01 21:02:33	00:04:14.966000	1	2	2	1	5	Catalunya	2	2	2	2	2	2	2	2	1	No	Sí, por confinamiento por contacto estrecho o sospecha de COVID-19	0	1	0	0	0	0	0	0	0	0	25	1	21	47	1	2	3	2	1	1	1	2	0	1	1	1	4	0	1
824	2021-02-01 21:01:42	2021-02-01 21:06:24	00:04:42.960000	1	2	2	1	5	Catalunya	2	2	1	14	4	2	2	1	1	No	No	1	0	0	0	0	0	0	0	0	0	2	1	48	51	3	3	3	2	0	1	1	6	0	0	6	0	6	1	0
826	2021-02-01 20:58:48	2021-02-01 21:11:31	00:12:41.962000	1	2	2	1	5	Catalunya	2	9	4	4	3	1	1	1	1	No	No	1	0	0	0	0	0	0	0	0	0	14	8	38	60	2	3	2	2	1	4	1	6	1	3	6	0	5	6	1
827	2021-02-01 21:08:47	2021-02-01 21:12:01	00:03:13.968000	2	2	3	1	5	Catalunya	1	4	4	4	4	1	1	1	1	No	No	1	0	0	0	0	0	0	0	0	0	3	2	47	52	3	3	3	2	0	0	0	6	0	0	5	0	6	1	1
829	2021-02-01 21:08:54	2021-02-01 21:14:30	00:05:36.010000	1	2	1	1	5	Catalunya	1	4	4	4	2	1	1	1	1	No	No	0	0	0	0	0	0	0	1	0	0	7	2	34	43	2	3	3	2	2	1	2	4	0	1	5	0	5	1	0
831	2021-02-01 21:14:18	2021-02-01 21:17:18	00:02:59.971000	1	2	2	1	5	Catalunya	2	3	2	2	2	2	2	1	1	No	No	1	0	0	0	0	0	0	0	0	0	54	23	15	92	1	1	1	3	6	6	6	4	5	6	4	6	1	6	6
832	2021-02-01 21:11:00	2021-02-01 21:17:18	00:06:19.037000	1	2	2	1	5	Catalunya	1	4	4	4	3	1	1	2	1	No	Sí, por problemas de salud psíquicos	0	1	0	0	0	1	1	1	0	0	25	2	42	69	3	2	3	3	1	5	5	6	0	1	6	1	6	1	1
833	2021-02-01 21:05:15	2021-02-01 21:17:32	00:12:18.029000	1	2	3	1	5	Catalunya	2	17	9	14	4	1	1	3	2	No	Sí, por problemas de salud físicos	0	0	0	0	0	0	2	0	0	0	31	9	43	83	3	1	2	3	1	6	3	6	1	4	6	5	6	3	3
834	2021-02-01 21:10:44	2021-02-01 21:18:00	00:07:15.974000	2	1	4	1	5	Catalunya	2	2	7	7	4	3	1	1	1	No	No	1	0	0	0	0	0	0	0	0	0	45	23	27	95	1	1	1	3	4	5	4	4	4	5	3	6	5	5	6
837	2021-02-01 21:12:36	2021-02-01 21:22:14	00:09:38.966000	1	2	3	1	5	Catalunya	2	3	11	14	4	1	1	1	1	No	Sí, por problemas de salud psíquicos	0	2	2	0	0	2	2	1	2	0	49	18	34	101	2	1	1	3	4	6	6	6	1	5	5	5	5	4	6
840	2021-02-01 21:04:45	2021-02-01 21:28:07	00:23:22.013000	1	2	3	1	5	Catalunya	2	2	2	2	3	2	2	3	2	No	Sí, por problemas de salud físicos	0	0	0	2	0	0	0	4	0	0	22	9	35	66	2	2	2	2	1	5	4	4	0	1	2	1	5	4	3
841	2021-02-01 21:16:25	2021-02-01 21:28:18	00:11:52.022000	2	2	4	1	5	Catalunya	1	3	7	7	4	2	2	3	2	No	Sí, por problemas de salud físicos	0	0	4	0	0	4	4	0	0	0	16	3	40	59	2	3	3	2	2	2	1	6	0	1	3	1	6	1	1
842	2021-02-01 21:22:02	2021-02-01 21:28:56	00:06:54.979000	1	1	2	1	5	Catalunya	2	6	7	7	3	2	2	1	1	No	No	1	0	0	0	0	0	0	0	0	0	5	4	43	52	3	3	3	2	0	0	0	6	1	1	1	1	6	2	0
843	2021-02-01 21:22:26	2021-02-01 21:29:12	00:06:45.994000	2	2	2	1	5	Catalunya	2	7	2	2	4	2	2	1	1	No	No	0	0	0	0	0	2	0	0	2	0	39	8	32	79	2	1	2	3	3	6	6	6	2	1	4	5	6	2	2
844	2021-02-01 21:15:23	2021-02-01 21:29:26	00:14:03.005000	2	2	3	1	5	Catalunya	1	3	4	4	4	2	2	3	2	No	Sí, por confinamiento por contacto estrecho o sospecha de COVID-19	1	0	0	0	0	0	0	0	0	0	10	6	38	54	2	3	2	2	1	1	1	6	0	1	1	1	6	3	3
845	2021-02-01 21:24:21	2021-02-01 21:30:25	00:06:02.966000	2	1	1	1	5	Catalunya	1	4	4	4	1	1	1	3	2	Sí, por primera vez en mi vida	Sí, por confinamiento por contacto estrecho o sospecha de COVID-19	1	0	0	0	0	0	0	0	0	0	41	18	30	89	1	1	1	3	5	4	0	4	5	5	5	6	1	4	5
848	2021-02-01 21:34:17	2021-02-01 21:41:48	00:07:31.958000	2	2	2	1	5	Catalunya	1	1	10	10	3	3	1	1	1	No	No	1	0	0	0	0	0	0	0	0	0	18	5	36	59	2	3	3	2	1	1	1	6	0	1	2	3	6	2	3
849	2021-02-01 21:35:16	2021-02-01 21:42:40	00:07:22.973000	1	2	3	1	5	Catalunya	2	3	2	2	4	2	2	3	2	No	Sí, por confinamiento por contacto estrecho o sospecha de COVID-19	0	4	0	4	4	4	4	0	4	0	20	4	36	60	2	2	3	2	5	6	3	6	1	1	1	1	5	3	0
851	2021-02-01 21:41:30	2021-02-01 21:48:56	00:07:25.997000	1	2	2	1	5	Catalunya	2	2	7	7	2	2	2	2	1	No	Sí, por confinamiento por contacto estrecho o sospecha de COVID-19	0	2	2	2	0	2	2	0	0	0	50	18	28	96	1	1	1	3	6	6	6	4	5	6	6	6	3	5	5
852	2021-02-01 21:40:57	2021-02-01 21:50:06	00:09:08.986000	1	2	2	1	5	Catalunya	2	3	7	7	3	2	2	1	1	No	No	0	0	0	0	0	2	0	0	0	0	34	8	43	85	3	1	2	3	3	6	6	6	1	1	6	5	6	1	1
853	2021-02-01 21:38:48	2021-02-01 21:55:02	00:16:13.987000	1	2	2	1	5	Catalunya	2	6	2	2	3	1	1	3	2	No	No	1	0	0	0	0	0	0	0	0	0	11	0	36	47	2	3	3	2	1	4	1	6	0	0	5	3	0	0	0
854	2021-02-01 21:47:48	2021-02-01 22:00:21	00:12:32.026000	2	2	2	1	5	Catalunya	1	11	4	4	3	1	1	4	2	No	Sí, por confinamiento por contacto estrecho o sospecha de COVID-19	0	2	0	0	0	2	2	0	0	0	50	14	12	76	1	1	1	3	4	6	6	4	4	6	1	6	2	4	4
856	2021-02-01 21:38:57	2021-02-01 22:11:18	00:32:20.026000	1	2	3	1	5	Catalunya	1	4	4	4	4	1	1	1	1	No	No	1	0	0	0	0	0	0	0	0	0	27	12	30	69	1	1	1	3	3	5	3	4	4	3	3	3	6	3	2
857	2021-02-01 22:01:50	2021-02-01 22:12:01	00:10:09.984000	1	2	1	1	5	Catalunya	1	4	4	4	2	1	1	1	1	Sí, anteriormente estaba sin actividad laboral	No	0	2	0	0	0	0	2	0	1	0	26	8	46	80	3	2	2	3	5	5	5	6	0	2	6	3	5	5	3
858	2021-02-01 22:09:11	2021-02-01 22:14:10	00:04:59.981000	1	2	1	1	5	Catalunya	1	3	1	14	1	1	1	2	1	Sí, anteriormente estaba sin actividad laboral	No	0	1	1	2	1	0	1	1	1	1	25	9	42	76	3	2	2	3	2	3	1	6	0	2	3	2	6	1	2
860	2021-02-01 22:07:10	2021-02-01 22:19:55	00:12:46.022000	1	2	4	1	5	Catalunya	2	2	7	7	4	2	2	1	1	No	Sí, por problemas de salud psíquicos	0	1	1	0	1	1	1	0	0	0	54	8	30	92	1	1	2	3	6	6	6	6	2	6	6	6	6	1	2
862	2021-02-01 22:12:47	2021-02-01 22:22:25	00:09:38.966000	1	2	3	1	5	Catalunya	2	2	2	2	4	3	1	1	1	No	No	0	0	0	0	0	2	2	0	2	0	40	8	43	91	3	1	2	3	5	6	6	6	0	3	6	6	6	1	1
863	2021-02-01 22:10:13	2021-02-01 22:23:17	00:13:03.994000	2	2	3	1	5	Catalunya	2	2	13	14	1	1	1	1	1	No	No	1	0	0	0	0	0	0	0	0	0	4	5	24	33	1	3	3	1	1	0	0	0	0	0	2	0	2	2	1
864	2021-02-01 22:09:26	2021-02-01 22:23:19	00:13:52.982000	1	2	2	1	5	Catalunya	1	3	2	2	4	2	2	3	2	No	No	0	0	0	0	0	0	4	0	0	0	32	15	36	83	2	1	1	3	3	5	2	4	3	3	5	5	5	3	3
865	2021-02-01 22:21:22	2021-02-01 22:26:30	00:05:08.966000	1	2	2	1	5	Catalunya	1	1	4	4	3	1	1	2	1	No	Sí, por confinamiento por contacto estrecho o sospecha de COVID-19	0	0	0	0	1	0	2	0	0	0	18	9	24	51	1	3	2	2	2	2	3	1	1	2	4	2	3	3	2
866	2021-02-01 22:25:33	2021-02-01 22:29:51	00:04:17.040000	1	2	1	1	5	Catalunya	2	3	2	2	1	2	2	1	1	No	No	1	0	0	0	0	0	0	0	0	0	29	9	30	68	1	1	2	3	2	3	3	6	5	0	1	3	3	2	2
867	2021-02-01 22:25:10	2021-02-01 22:30:50	00:05:39.984000	1	1	1	1	5	Catalunya	2	3	11	14	1	2	2	1	1	No	No	0	0	0	0	1	0	1	1	0	0	22	9	33	64	2	2	2	2	2	3	3	6	0	3	3	3	3	3	1
868	2021-02-01 22:24:44	2021-02-01 22:31:11	00:06:26.035000	1	1	2	1	5	Catalunya	1	3	4	4	1	1	1	2	1	No	Sí, por confinamiento por contacto estrecho o sospecha de COVID-19	1	0	0	0	0	0	0	0	0	0	12	2	43	57	3	3	3	2	1	3	3	6	0	1	1	1	6	1	0
870	2021-02-01 22:23:47	2021-02-01 22:35:43	00:11:57.034000	2	2	2	1	5	Catalunya	2	2	2	2	3	2	2	3	2	No	Sí, por confinamiento por contacto estrecho o sospecha de COVID-19	0	0	0	0	0	0	1	0	0	0	22	8	39	69	2	2	2	3	3	2	1	6	2	4	4	4	6	4	1
871	2021-02-01 22:25:54	2021-02-01 22:35:43	00:09:48.989000	1	2	3	1	5	Catalunya	2	2	11	14	4	3	1	1	1	No	No	1	0	0	0	0	0	0	0	0	0	20	10	35	65	2	2	1	2	0	5	1	6	1	3	3	3	3	2	3
872	2021-02-01 22:23:45	2021-02-01 22:37:25	00:13:40.973000	1	2	3	1	5	Catalunya	1	4	4	4	4	1	1	1	1	No	No	1	0	0	0	0	0	0	0	0	0	39	11	41	91	3	1	1	3	3	5	2	4	3	5	6	6	6	3	3
873	2021-02-01 22:35:10	2021-02-01 22:40:21	00:05:11.990000	1	2	2	1	5	Catalunya	1	4	4	4	3	1	1	1	1	No	No	1	0	0	0	0	0	0	0	0	0	8	11	44	63	3	3	1	2	1	1	1	6	2	1	3	1	5	4	1
874	2021-02-01 22:33:51	2021-02-01 22:40:23	00:06:31.997000	1	1	1	1	5	Catalunya	1	3	4	4	3	2	2	4	2	No	Sí, por problemas de salud físicos	0	0	0	4	0	0	0	0	0	0	9	0	37	46	2	3	3	2	1	1	2	6	0	0	1	0	5	0	0
875	2021-02-01 22:31:13	2021-02-01 22:40:35	00:09:22.032000	1	2	1	1	5	Catalunya	1	4	4	4	3	1	1	1	1	No	No	0	1	1	0	1	1	1	1	1	0	41	10	34	85	2	1	1	3	4	5	6	6	5	6	6	5	6	4	0
876	2021-02-01 22:39:31	2021-02-01 22:47:44	00:08:12.998000	1	2	2	1	5	Catalunya	2	2	2	2	4	2	2	1	1	No	No	1	0	0	0	0	0	0	0	0	0	22	7	32	61	2	2	2	2	2	3	1	6	1	1	4	2	5	3	1
878	2021-02-01 22:42:25	2021-02-01 22:47:58	00:05:32.035000	2	2	3	1	5	Catalunya	2	3	1	14	4	2	2	3	2	No	Sí, por problemas de salud físicos	1	0	0	0	0	0	0	0	0	0	35	24	28	87	1	1	1	3	4	3	4	4	5	5	4	5	3	6	6
881	2021-02-01 22:41:59	2021-02-01 22:51:16	00:09:17.971000	1	2	1	1	5	Catalunya	1	3	4	4	2	2	2	3	2	No	Sí, por confinamiento por contacto estrecho o sospecha de COVID-19	0	0	0	0	0	0	4	0	0	0	28	8	36	72	2	1	2	3	3	5	0	6	5	3	3	3	6	1	1
883	2021-02-01 22:44:48	2021-02-01 22:56:23	00:11:33.965000	1	1	1	1	5	Catalunya	1	4	4	4	2	1	1	1	1	No	No	1	0	0	0	0	0	0	0	0	0	44	11	37	92	2	1	1	3	3	5	5	6	1	4	1	5	6	5	4
885	2021-02-01 22:54:54	2021-02-01 23:01:52	00:06:59.040000	2	1	4	1	5	Catalunya	2	9	7	7	4	1	1	1	1	No	No	1	0	0	0	0	0	0	0	0	0	18	4	39	61	2	3	3	2	1	3	3	6	0	1	6	2	5	1	2
886	2021-02-01 22:56:11	2021-02-01 23:02:06	00:05:55.018000	1	2	1	1	5	Catalunya	1	10	4	4	2	1	1	1	1	No	No	1	0	0	0	0	0	0	0	0	0	16	5	44	65	3	3	3	2	1	3	2	6	1	1	6	1	5	1	2
888	2021-02-01 23:08:42	2021-02-01 23:12:45	00:04:03.994000	2	2	4	1	5	Catalunya	2	2	2	2	4	2	2	1	1	No	No	0	0	2	0	2	0	0	0	0	0	25	8	28	61	1	2	2	2	2	3	3	6	1	1	4	2	5	1	3
889	2021-02-01 22:12:05	2021-02-01 23:16:16	01:04:11.021000	1	1	2	1	5	Catalunya	1	3	1	14	3	2	2	1	1	No	No	0	0	0	0	0	0	1	1	0	0	34	15	25	74	1	1	1	3	6	6	6	6	3	3	1	1	1	5	5
891	2021-02-01 23:21:40	2021-02-01 23:27:48	00:06:09.014000	1	2	1	1	5	Catalunya	2	3	4	4	1	2	2	3	2	No	No	1	0	0	0	0	0	0	0	0	0	38	19	35	92	2	1	1	3	4	3	3	6	4	4	6	6	4	6	6
893	2021-02-01 23:44:26	2021-02-01 23:48:00	00:03:32.976000	1	2	1	1	5	Catalunya	2	2	1	14	1	2	2	2	1	No	Sí, por confinamiento por contacto estrecho o sospecha de COVID-19	0	2	2	0	0	2	2	1	2	0	41	20	33	94	2	1	1	3	3	6	5	6	1	5	6	5	3	6	6
894	2021-02-01 23:48:24	2021-02-01 23:54:25	00:06:00.979000	1	2	4	1	5	Catalunya	2	2	7	7	4	2	2	1	1	No	No	0	2	0	0	2	0	0	0	0	0	29	9	47	85	3	1	2	3	1	5	5	6	0	1	6	5	6	1	3
896	2021-02-01 23:49:55	2021-02-02 00:00:01	00:10:04.973000	1	1	2	1	5	Catalunya	2	3	2	2	3	2	2	3	2	No	Sí, por problemas de salud físicos	0	4	0	0	0	4	4	0	0	0	14	7	33	54	2	3	2	2	2	5	3	4	0	0	1	1	5	3	3
898	2021-02-01 23:53:26	2021-02-02 00:02:15	00:08:49.027000	2	2	2	1	5	Catalunya	1	1	4	4	3	2	2	1	1	No	No	0	2	0	0	2	2	2	1	0	0	38	13	43	94	3	1	1	3	3	4	3	6	4	4	5	5	5	4	4
905	2021-02-02 02:03:18	2021-02-02 02:09:41	00:06:23.962000	2	2	1	1	5	Catalunya	1	4	4	4	2	1	1	4	2	No	No	0	0	2	4	0	0	0	4	0	0	38	13	26	77	1	1	1	3	6	5	6	6	4	2	3	4	3	5	2
907	2021-02-02 07:29:35	2021-02-02 07:36:14	00:06:37.958000	1	2	2	1	5	Catalunya	1	3	4	4	3	2	2	3	2	No	Sí, por problemas de salud físicos	0	4	4	4	4	4	4	4	4	0	46	6	37	89	2	1	2	3	5	5	5	6	0	5	5	6	6	3	3
909	2021-02-02 08:10:36	2021-02-02 08:22:34	00:11:57.034000	2	2	3	1	5	Catalunya	2	14	2	2	4	2	2	2	1	No	Sí, por confinamiento por contacto estrecho o sospecha de COVID-19	0	0	2	0	0	0	0	0	0	0	19	2	27	48	1	3	3	2	1	2	0	1	0	1	1	3	6	1	1
911	2021-02-02 08:29:48	2021-02-02 08:35:31	00:05:41.971000	1	2	3	1	5	Catalunya	2	3	11	14	4	2	2	1	1	No	No	1	0	0	0	0	0	0	0	0	0	12	9	46	67	3	3	2	3	1	2	1	6	0	1	4	3	6	1	6
912	2021-02-02 08:38:08	2021-02-02 08:48:00	00:09:50.976000	1	1	1	1	5	Catalunya	1	3	4	4	1	1	1	1	1	Sí, anteriormente estaba sin actividad laboral	No	0	0	0	0	1	0	0	1	0	0	20	7	37	64	2	2	2	2	4	3	1	6	3	1	3	1	6	3	0
913	2021-02-02 08:47:20	2021-02-02 08:52:21	00:05:01.968000	1	2	4	1	5	Catalunya	2	2	7	7	4	1	1	2	1	No	Sí, por confinamiento por contacto estrecho o sospecha de COVID-19	0	1	0	0	0	1	0	0	1	0	27	11	27	65	1	1	1	2	1	3	3	4	1	5	3	3	3	4	3
914	2021-02-02 08:35:43	2021-02-02 08:52:56	00:17:12.998000	2	2	2	1	5	Catalunya	1	6	13	14	4	2	2	3	2	No	Sí, por confinamiento por contacto estrecho o sospecha de COVID-19	0	3	0	0	4	1	3	0	4	0	13	8	34	55	2	3	2	2	1	3	1	6	1	1	6	1	3	5	2
919	2021-02-02 09:09:22	2021-02-02 09:17:30	00:08:07.987000	1	2	2	1	5	Catalunya	2	3	4	4	3	2	2	3	2	No	Sí, por confinamiento por contacto estrecho o sospecha de COVID-19	0	2	2	3	0	3	2	1	2	0	34	14	41	89	3	1	1	3	4	6	6	6	6	1	3	6	6	6	0
921	2021-02-02 09:11:55	2021-02-02 09:20:10	00:08:14.035000	2	2	2	1	5	Catalunya	1	4	4	4	3	1	1	3	2	No	Sí, por confinamiento por contacto estrecho o sospecha de COVID-19	0	3	3	3	0	3	3	3	0	0	5	2	40	47	2	3	3	2	1	1	1	6	0	0	4	1	6	1	1
923	2021-02-02 09:36:29	2021-02-02 09:49:42	00:13:14.016000	1	2	2	1	5	Catalunya	2	3	2	2	3	2	2	3	2	No	Sí, por confinamiento por contacto estrecho o sospecha de COVID-19	0	4	2	0	0	4	2	1	0	0	31	7	32	70	2	1	2	3	4	5	4	6	2	1	3	5	6	3	2
927	2021-02-02 09:55:46	2021-02-02 10:00:54	00:05:06.979000	1	2	2	1	5	Catalunya	2	7	1	14	4	2	2	2	1	No	Sí, por confinamiento por contacto estrecho o sospecha de COVID-19	0	0	0	0	0	0	2	1	2	0	13	5	32	50	2	3	3	2	1	4	2	6	0	1	1	1	4	1	3
930	2021-02-02 10:02:23	2021-02-02 10:14:05	00:11:43.037000	2	2	4	1	5	Catalunya	2	2	2	2	4	2	2	3	2	No	Sí, por confinamiento por contacto estrecho o sospecha de COVID-19	0	0	0	0	0	0	0	0	4	0	21	9	38	68	2	2	2	3	1	6	3	6	0	1	5	3	5	2	3
933	2021-02-02 10:20:28	2021-02-02 10:27:21	00:06:54.029000	1	2	1	1	5	Catalunya	1	4	4	4	1	1	1	1	1	No	No	0	2	1	0	0	0	0	1	0	0	31	15	38	84	2	1	1	3	2	3	2	4	2	5	5	4	5	4	4
938	2021-02-02 10:39:43	2021-02-02 10:45:44	00:06:02.016000	2	1	4	1	5	Catalunya	1	6	7	7	4	2	2	1	1	No	No	0	0	0	0	0	1	0	0	0	0	27	5	45	77	3	1	3	3	2	3	5	6	1	3	5	3	6	0	1
939	2021-02-02 10:45:30	2021-02-02 10:52:57	00:07:27.034000	1	1	1	1	5	Catalunya	1	4	4	4	2	1	1	3	2	No	Sí, por confinamiento por contacto estrecho o sospecha de COVID-19	0	3	0	3	0	0	3	3	0	0	32	4	38	74	2	1	3	3	4	5	5	4	0	5	6	5	6	3	0
940	2021-02-02 09:29:33	2021-02-02 10:58:44	01:29:09.974000	1	2	1	1	5	Catalunya	2	2	4	4	2	1	1	3	2	No	Sí, por problemas de salud físicos	0	4	0	4	1	1	0	0	0	0	34	1	33	68	2	1	3	3	5	5	5	6	0	1	0	5	5	0	0
942	2021-02-02 11:01:43	2021-02-02 11:09:36	00:07:52.003000	1	2	1	1	5	Catalunya	1	1	4	4	1	1	1	3	2	No	Sí, por confinamiento por contacto estrecho o sospecha de COVID-19	1	0	0	0	0	0	0	0	0	0	21	2	43	66	3	2	3	2	1	3	3	6	0	1	5	3	6	1	0
945	2021-02-02 12:04:24	2021-02-02 12:09:26	00:05:01.018000	1	2	1	1	5	Catalunya	1	4	4	4	1	1	1	1	1	No	No	1	0	0	0	0	0	0	0	0	0	43	13	38	94	2	1	1	3	6	5	5	6	4	5	6	5	6	6	0
948	2021-02-02 12:15:24	2021-02-02 12:21:27	00:06:02.966000	1	2	1	1	5	Catalunya	1	10	4	4	2	1	1	1	1	No	No	1	0	0	0	0	0	0	0	0	0	34	24	35	93	2	1	1	3	5	4	4	4	6	5	5	3	6	5	6
951	2021-02-02 13:00:23	2021-02-02 13:06:44	00:06:21.024000	1	2	4	1	5	Catalunya	1	7	2	2	4	2	2	3	2	No	Sí, por confinamiento por contacto estrecho o sospecha de COVID-19	1	0	0	0	0	0	0	0	0	0	5	4	34	43	2	3	3	2	1	1	0	6	0	0	1	1	5	2	2
953	2021-02-02 08:33:45	2021-02-02 13:10:36	04:36:51.005000	2	2	1	1	5	Catalunya	1	4	4	4	2	1	1	1	1	No	No	1	0	0	0	0	0	0	0	0	0	16	10	42	68	3	3	1	3	0	5	3	6	3	3	3	0	6	3	0
955	2021-02-02 13:26:53	2021-02-02 13:35:48	00:08:54.989000	2	2	2	1	5	Catalunya	2	6	4	4	3	2	2	3	2	No	Sí, por confinamiento por contacto estrecho o sospecha de COVID-19	0	0	0	0	0	0	4	0	0	0	12	0	40	52	2	3	3	2	2	2	3	6	0	1	1	1	6	0	0
956	2021-02-02 13:45:26	2021-02-02 13:52:10	00:06:44.006000	2	2	4	1	5	Catalunya	2	2	7	7	4	2	2	3	2	No	Sí, por problemas de salud físicos	0	4	4	4	0	4	4	0	4	0	53	27	14	94	1	1	1	3	6	6	6	4	6	6	5	6	3	6	6
957	2021-02-02 13:54:45	2021-02-02 13:59:10	00:04:24.038000	2	2	1	1	5	Catalunya	2	6	2	2	1	1	1	3	2	No	Sí, por confinamiento por contacto estrecho o sospecha de COVID-19	0	4	4	4	4	1	1	1	4	0	50	21	30	101	1	1	1	3	5	6	6	4	5	6	6	6	2	6	5
960	2021-02-02 14:32:46	2021-02-02 14:46:19	00:13:33.974000	1	2	1	1	5	Catalunya	1	3	4	4	2	2	2	3	2	No	Sí, por problemas de salud físicos	0	4	0	4	4	4	4	4	4	0	54	24	13	91	1	1	1	3	6	6	6	1	6	6	1	6	5	6	6
966	2021-02-02 16:43:49	2021-02-02 16:50:15	00:06:26.986000	1	2	1	1	5	Catalunya	2	3	1	14	1	2	2	3	2	No	Sí, por confinamiento por contacto estrecho o sospecha de COVID-19	0	0	0	0	0	2	2	0	0	0	25	5	26	56	1	2	3	2	2	6	5	6	0	3	1	1	3	1	0
967	2021-02-02 17:03:28	2021-02-02 17:14:16	00:10:46.963000	2	2	1	1	5	Catalunya	1	4	4	4	1	1	1	1	1	No	No	1	0	0	0	0	0	0	0	0	0	12	2	42	56	3	3	3	2	1	1	1	6	0	1	2	2	6	2	0
968	2021-02-02 17:28:36	2021-02-02 17:32:02	00:03:25.027000	1	2	2	1	5	Catalunya	2	6	2	2	3	2	2	1	1	No	Sí, por problemas de salud físicos	1	0	0	0	0	0	0	0	0	0	44	16	30	90	1	1	1	3	6	6	6	6	6	1	5	6	6	5	5
969	2021-02-02 17:30:19	2021-02-02 17:36:27	00:06:07.027000	2	2	1	1	5	Catalunya	2	6	7	7	1	2	2	3	2	Sí, por primera vez en mi vida	Sí, por confinamiento por contacto estrecho o sospecha de COVID-19	1	0	0	0	0	0	0	0	0	0	33	9	41	83	3	1	2	3	4	4	4	6	3	3	5	4	5	0	3
972	2021-02-02 17:46:14	2021-02-02 17:57:52	00:11:38.976000	1	2	1	1	5	Catalunya	2	6	2	2	1	2	2	3	2	No	Sí, por confinamiento por contacto estrecho o sospecha de COVID-19	0	3	3	3	0	3	3	3	3	3	27	11	38	76	2	1	1	3	3	4	4	4	0	1	6	6	6	5	6
975	2021-02-02 18:00:57	2021-02-02 18:10:28	00:09:29.981000	1	2	3	1	5	Catalunya	1	3	4	4	3	2	2	2	1	No	Sí, por confinamiento por contacto estrecho o sospecha de COVID-19	0	1	0	0	1	2	2	1	2	0	26	7	31	64	2	2	2	2	3	5	5	4	0	1	5	2	5	3	4
976	2021-02-02 18:12:25	2021-02-02 18:18:13	00:05:48.019000	1	2	1	1	5	Catalunya	2	6	2	2	1	2	2	3	2	No	No	0	0	0	0	0	0	4	0	0	0	30	15	39	84	2	1	1	3	3	4	5	6	1	1	6	1	4	4	5
981	2021-02-02 19:03:03	2021-02-02 19:12:17	00:09:13.997000	1	2	3	1	5	Catalunya	1	3	13	14	4	1	1	1	1	No	No	0	2	0	0	2	0	1	0	0	0	18	10	36	64	2	3	1	2	1	6	1	6	4	1	3	2	3	3	1
982	2021-02-02 19:09:58	2021-02-02 19:16:02	00:06:05.040000	1	1	3	1	5	Catalunya	1	4	7	7	4	2	2	1	1	No	No	1	0	0	0	0	0	0	0	0	0	19	4	33	56	2	3	3	2	1	3	1	2	1	1	6	4	6	1	2
983	2021-02-02 19:15:22	2021-02-02 19:21:50	00:06:28.973000	1	2	4	1	5	Catalunya	2	8	2	2	4	2	2	1	1	No	No	1	0	0	0	0	0	0	0	0	0	7	5	46	58	3	3	3	2	1	1	0	6	0	1	6	1	6	1	1
988	2021-02-02 18:58:12	2021-02-02 19:30:12	00:31:59.981000	1	2	1	1	5	Catalunya	2	3	1	14	1	2	2	3	2	No	Sí, por confinamiento por contacto estrecho o sospecha de COVID-19	0	4	0	4	4	4	4	4	4	0	33	6	31	70	2	1	2	3	5	6	6	4	1	1	5	4	4	3	1
989	2021-02-02 19:25:47	2021-02-02 19:31:21	00:05:34.022000	1	1	3	1	5	Catalunya	1	4	7	7	4	2	2	3	2	No	Sí, por problemas de salud físicos	1	0	0	0	0	0	0	0	0	0	14	2	43	59	3	3	3	2	0	1	0	6	1	3	1	1	6	0	0
990	2021-02-02 19:27:14	2021-02-02 19:33:18	00:06:04.003000	1	1	1	1	5	Catalunya	2	6	2	2	3	2	2	3	2	No	Sí, por confinamiento por contacto estrecho o sospecha de COVID-19	1	0	0	0	0	0	0	0	0	0	26	0	42	68	3	2	3	3	2	5	5	6	0	2	6	3	3	0	0
991	2021-02-02 19:29:51	2021-02-02 19:35:55	00:06:04.003000	1	2	1	1	5	Catalunya	1	3	4	4	1	2	2	1	1	No	No	0	0	0	0	0	0	0	1	0	0	30	16	43	89	3	1	1	3	3	5	3	4	4	4	5	3	6	4	2
992	2021-02-02 19:38:47	2021-02-02 19:53:01	00:14:13.978000	1	2	3	1	5	Catalunya	2	6	1	14	4	2	2	3	2	No	Sí, por confinamiento por contacto estrecho o sospecha de COVID-19	1	0	0	0	0	0	0	0	0	0	13	0	48	61	3	3	3	2	0	5	5	6	0	0	6	1	6	0	0
993	2021-02-02 20:06:43	2021-02-02 20:12:14	00:05:30.998000	1	2	1	1	5	Catalunya	2	6	2	2	1	1	1	1	1	No	No	1	0	0	0	0	0	0	0	0	0	16	7	27	50	1	3	2	2	2	3	2	2	1	1	2	3	4	2	2
994	2021-02-02 20:03:07	2021-02-02 20:14:09	00:11:03.034000	2	2	1	1	5	Catalunya	2	2	7	7	1	2	2	3	2	Sí, por primera vez en mi vida	Sí, por problemas de salud físicos	1	0	0	0	0	0	0	0	0	0	28	9	25	62	1	1	2	2	3	4	5	4	3	2	2	3	4	1	1
995	2021-02-02 20:16:04	2021-02-02 20:24:22	00:08:18.010000	2	2	3	1	5	Catalunya	1	4	9	14	4	3	1	3	2	No	Sí, por confinamiento por contacto estrecho o sospecha de COVID-19	0	0	0	0	2	4	4	0	0	0	19	4	38	61	2	3	3	2	1	5	4	6	0	1	2	1	6	1	1
996	2021-02-02 20:15:43	2021-02-02 20:31:34	00:15:51.005000	1	2	3	1	5	Catalunya	1	1	10	10	3	1	1	1	1	No	No	0	0	0	0	0	2	0	0	0	0	6	0	37	43	2	3	3	2	1	1	0	6	0	1	1	0	6	0	0
998	2021-02-02 20:46:23	2021-02-02 20:51:59	00:05:36.010000	1	2	2	1	5	Catalunya	2	1	4	4	3	1	1	2	1	No	Sí, por confinamiento por contacto estrecho o sospecha de COVID-19	1	0	0	0	0	0	0	0	0	0	31	0	42	73	3	1	3	3	1	6	6	6	0	0	6	6	6	0	0
999	2021-02-02 20:52:20	2021-02-02 21:02:33	00:10:13.958000	1	2	4	1	5	Catalunya	1	3	4	4	3	2	2	3	2	No	Sí, por confinamiento por contacto estrecho o sospecha de COVID-19	0	0	0	4	0	0	0	0	4	0	5	0	46	51	3	3	3	2	1	1	0	6	0	0	6	1	6	0	0
1000	2021-02-02 21:19:35	2021-02-02 21:27:48	00:08:12.998000	2	1	4	1	5	Catalunya	1	4	7	7	4	2	2	1	1	No	No	1	0	0	0	0	0	0	0	0	0	13	14	44	71	3	3	1	3	1	4	1	6	1	3	6	1	6	4	1
1002	2021-02-02 21:57:48	2021-02-02 22:05:19	00:07:31.008000	1	2	2	1	5	Catalunya	2	2	13	14	3	2	2	1	1	No	No	0	0	2	2	1	0	1	0	0	0	32	16	30	78	1	1	1	3	3	5	3	6	1	5	4	5	3	5	5
1005	2021-02-02 22:26:01	2021-02-02 22:31:25	00:05:25.037000	1	2	2	1	5	Catalunya	1	6	7	7	3	2	2	1	1	No	No	1	0	0	0	0	0	0	0	0	0	42	5	41	88	3	1	3	3	4	6	6	6	0	5	6	5	6	0	0
1006	2021-02-02 22:28:22	2021-02-02 22:31:37	00:03:13.968000	1	1	1	1	5	Catalunya	1	2	4	4	1	1	1	1	1	No	Sí, por confinamiento por contacto estrecho o sospecha de COVID-19	1	0	0	0	0	0	0	0	0	0	45	24	34	103	2	1	1	3	6	4	4	4	6	6	0	6	6	5	6
1007	2021-02-02 22:31:49	2021-02-02 22:36:00	00:04:10.992000	2	2	4	1	5	Catalunya	2	7	7	7	4	2	2	1	1	No	No	1	0	0	0	0	0	0	0	0	0	45	12	24	81	1	1	1	3	6	5	6	6	6	3	6	6	3	0	0
1008	2021-02-02 22:25:21	2021-02-02 22:37:41	00:12:18.979000	1	2	2	1	5	Catalunya	2	6	1	14	3	2	2	1	1	No	No	0	0	0	2	0	0	0	0	0	0	17	14	34	65	2	3	1	2	1	3	2	4	3	3	3	3	6	5	4
1009	2021-02-02 22:46:46	2021-02-02 22:53:44	00:06:59.040000	1	2	3	1	5	Catalunya	1	4	4	4	4	1	1	4	2	No	Sí, por problemas de salud físicos	1	0	0	0	0	0	0	0	0	0	12	4	32	48	2	3	3	2	1	1	1	0	1	2	1	1	6	1	1
1010	2021-02-02 23:05:42	2021-02-02 23:09:29	00:03:46.022000	1	1	1	1	5	Catalunya	1	1	4	4	2	1	1	2	1	No	Sí, por confinamiento por contacto estrecho o sospecha de COVID-19	0	0	0	0	0	0	0	1	0	0	18	4	37	59	2	3	3	2	3	4	1	6	1	1	3	3	4	0	0
1011	2021-02-02 23:22:53	2021-02-02 23:33:38	00:10:44.976000	2	1	3	1	5	Catalunya	2	17	2	2	4	1	1	3	2	No	Sí, por confinamiento por contacto estrecho o sospecha de COVID-19	0	4	0	4	0	4	0	0	0	0	22	3	20	45	1	2	3	2	1	5	5	4	0	1	3	3	3	1	1
1013	2021-02-03 00:16:27	2021-02-03 00:21:15	00:04:47.971000	1	2	1	1	5	Catalunya	1	4	4	4	1	1	1	2	1	No	Sí, por confinamiento por contacto estrecho o sospecha de COVID-19	0	2	2	0	0	0	1	1	0	0	53	10	20	83	1	1	1	3	6	6	6	3	6	6	3	6	1	0	0
1015	2021-02-03 00:44:16	2021-02-03 00:47:57	00:03:41.011000	1	2	1	1	5	Catalunya	2	8	2	2	1	2	2	1	1	No	Sí, por confinamiento por contacto estrecho o sospecha de COVID-19	1	0	0	0	0	0	0	0	0	0	0	0	0	0	1	3	3	1	#NULL!	#NULL!	#NULL!	#NULL!	#NULL!	#NULL!	#NULL!	#NULL!	#NULL!	#NULL!	#NULL!
1016	2021-02-03 01:05:15	2021-02-03 01:11:51	00:06:35.971000	1	1	1	1	5	Catalunya	2	2	4	4	1	1	1	2	1	No	No	0	0	0	0	0	1	0	0	0	0	8	7	39	54	2	3	2	2	0	1	1	6	2	1	6	1	2	1	1
1017	2021-02-03 02:44:22	2021-02-03 02:58:24	00:14:01.018000	2	2	3	1	5	Catalunya	2	8	1	14	4	2	2	1	1	No	No	0	0	0	2	0	2	2	0	0	0	36	8	32	76	2	1	2	3	5	5	5	4	0	2	5	6	5	5	2
1018	2021-02-03 06:21:30	2021-02-03 06:30:18	00:08:47.990000	2	2	2	1	5	Catalunya	1	3	4	4	3	1	1	3	2	No	Sí, por confinamiento por contacto estrecho o sospecha de COVID-19	0	0	0	0	0	0	2	4	0	0	8	8	47	63	3	3	2	2	1	3	0	6	0	0	6	1	6	5	3
1019	2021-02-03 07:19:17	2021-02-03 07:29:54	00:10:35.990000	1	2	2	1	5	Catalunya	2	10	10	10	4	1	1	3	2	No	Sí, por confinamiento por contacto estrecho o sospecha de COVID-19	0	4	0	0	0	2	0	1	0	0	27	13	44	84	3	1	1	3	1	3	4	6	5	5	6	4	5	3	1
1022	2021-02-03 09:20:05	2021-02-03 09:26:14	00:06:09.965000	1	1	1	1	5	Catalunya	1	2	4	4	1	2	2	1	1	Sí, por primera vez en mi vida	No	0	0	2	0	0	0	0	0	0	0	40	21	35	96	2	1	1	3	2	5	5	3	5	5	3	5	5	6	3
1024	2021-02-03 09:32:20	2021-02-03 09:43:01	00:10:41.002000	1	2	3	1	5	Catalunya	2	4	1	14	4	1	1	3	2	No	Sí, por problemas de salud físicos	0	4	0	4	0	3	0	0	0	0	27	7	34	68	2	1	2	3	4	4	4	4	2	4	4	5	4	2	1
1031	2021-02-03 10:45:58	2021-02-03 10:50:19	00:04:21.965000	2	1	1	1	5	Catalunya	1	2	4	4	1	1	1	1	1	No	No	0	2	0	2	0	2	2	0	0	0	41	21	40	102	2	1	1	3	5	5	5	6	3	4	5	6	6	6	6
1033	2021-02-03 11:18:04	2021-02-03 11:23:51	00:05:46.032000	2	2	1	1	5	Catalunya	1	4	4	4	2	1	1	4	2	No	No	1	0	0	0	0	0	0	0	0	0	19	11	41	71	3	3	1	3	1	5	5	6	3	1	6	1	6	3	2
1036	2021-02-03 11:51:17	2021-02-03 11:56:22	00:05:06.029000	2	2	5	1	5	Catalunya	1	4	7	7	4	1	1	1	1	Sí, anteriormente estaba sin actividad laboral	No	0	0	2	0	2	0	0	0	2	0	9	7	41	57	3	3	2	2	0	1	0	6	1	1	5	2	2	3	3
1038	2021-02-03 12:39:34	2021-02-03 12:47:00	00:07:25.997000	1	1	1	1	5	Catalunya	1	4	4	4	1	1	1	2	1	No	Sí, por confinamiento por contacto estrecho o sospecha de COVID-19	1	0	0	0	0	0	0	0	0	0	16	9	48	73	3	3	2	3	1	3	2	6	1	1	6	2	6	2	3
1039	2021-02-03 13:07:38	2021-02-03 13:13:56	00:06:19.037000	2	2	4	1	5	Catalunya	2	2	7	7	4	2	2	3	2	No	Sí, por confinamiento por contacto estrecho o sospecha de COVID-19	1	0	0	0	0	0	0	0	0	0	22	10	40	72	2	2	1	3	2	5	1	6	1	3	3	3	6	3	1
1040	2021-02-03 13:13:23	2021-02-03 13:17:51	00:04:28.013000	2	2	1	1	5	Catalunya	2	17	13	14	1	3	1	1	1	Sí, por primera vez en mi vida	No	0	2	0	0	0	0	2	1	0	0	32	17	45	94	3	1	1	3	3	4	4	6	3	3	6	4	6	4	4
1043	2021-02-03 14:04:17	2021-02-03 14:10:40	00:06:21.974000	2	1	1	1	5	Catalunya	1	4	4	4	2	1	1	1	1	No	No	1	0	0	0	0	0	0	0	0	0	7	2	47	56	3	3	3	2	1	1	1	6	0	1	6	1	6	0	0
1044	2021-02-03 14:06:31	2021-02-03 14:15:38	00:09:06.998000	1	2	1	1	5	Catalunya	1	3	4	4	2	2	2	3	2	No	Sí, por confinamiento por contacto estrecho o sospecha de COVID-19	0	0	0	0	0	4	4	0	0	0	38	9	35	82	2	1	2	3	6	6	2	6	0	2	5	5	4	3	3
1047	2021-02-03 14:17:31	2021-02-03 14:36:41	00:19:11.021000	1	2	3	1	5	Catalunya	2	3	4	4	3	2	2	3	2	No	Sí, por problemas de salud físicos	0	0	0	0	0	2	0	0	2	0	22	8	42	72	3	2	2	3	1	5	5	6	0	1	5	3	6	5	0
1050	2021-02-03 14:44:36	2021-02-03 14:53:45	00:09:10.022000	1	2	4	1	5	Catalunya	2	17	2	2	4	1	1	3	2	No	Sí, por confinamiento por contacto estrecho o sospecha de COVID-19	0	3	0	3	0	3	3	3	3	0	30	6	40	76	2	1	2	3	0	6	5	6	0	1	5	5	5	1	3
1053	2021-02-03 15:00:20	2021-02-03 15:07:03	00:06:42.019000	1	2	2	1	5	Catalunya	2	1	4	4	3	1	1	1	1	No	No	0	2	2	2	0	2	0	0	0	0	48	16	40	104	2	1	1	3	4	6	6	6	0	6	6	6	6	6	5
1054	2021-02-03 15:06:18	2021-02-03 15:12:20	00:06:02.966000	1	1	1	1	5	Catalunya	1	4	4	4	1	1	1	3	2	No	No	1	0	0	0	0	0	0	0	0	0	10	0	42	52	3	3	3	2	1	3	1	6	0	0	1	1	6	0	0
1056	2021-02-03 15:44:23	2021-02-03 15:49:31	00:05:06.979000	1	2	1	1	5	Catalunya	2	6	7	7	1	2	2	2	1	No	Sí, por confinamiento por contacto estrecho o sospecha de COVID-19	0	0	0	0	0	0	0	1	0	0	20	15	41	76	3	2	1	3	2	4	2	4	3	1	6	3	6	3	3
1057	2021-02-03 15:39:13	2021-02-03 15:51:02	00:11:50.035000	2	2	4	1	5	Catalunya	1	4	1	14	4	1	1	1	1	No	No	0	0	0	0	0	1	2	0	0	0	38	8	34	80	2	1	2	3	5	6	5	4	0	3	5	6	5	1	4
1061	2021-02-03 16:07:52	2021-02-03 16:27:16	00:19:23.030000	2	2	4	1	5	Catalunya	2	4	4	4	4	1	1	1	1	No	No	0	0	1	0	0	2	0	0	0	2	49	7	21	77	1	1	2	3	4	6	6	4	0	5	3	6	6	5	2
1062	2021-02-03 16:27:35	2021-02-03 16:33:18	00:05:41.971000	1	1	5	1	5	Catalunya	1	4	7	7	4	1	1	1	1	No	No	0	1	1	0	0	2	0	0	0	2	2	0	6	8	1	3	3	1	0	2	0	1	0	0	0	0	0	0	0
1063	2021-02-03 16:45:16	2021-02-03 16:51:23	00:06:07.027000	1	1	2	1	5	Catalunya	2	2	4	4	4	2	2	3	2	No	No	0	3	3	3	3	3	3	0	0	0	41	24	33	98	2	1	1	3	4	5	5	4	4	5	0	4	6	6	6
1066	2021-02-03 16:34:03	2021-02-03 17:10:45	00:36:41.040000	1	2	3	1	5	Catalunya	2	14	2	2	4	2	2	1	1	No	Sí, por problemas de salud físicos	0	0	0	0	0	1	2	1	1	0	31	8	23	62	1	1	2	2	5	6	5	3	0	0	0	3	1	3	4
1070	2021-02-03 17:22:12	2021-02-03 17:34:35	00:12:23.990000	1	1	2	1	5	Catalunya	2	2	13	14	3	1	1	1	1	No	No	0	0	0	0	0	0	0	0	0	2	41	10	36	87	2	1	1	3	5	5	5	6	1	4	6	5	5	4	5
1071	2021-02-03 18:02:14	2021-02-03 18:08:49	00:06:35.021000	1	2	1	1	5	Catalunya	2	3	2	2	3	2	2	3	2	No	Sí, por confinamiento por contacto estrecho o sospecha de COVID-19	0	4	0	4	1	4	4	4	0	0	32	15	32	79	2	1	1	3	3	6	6	4	1	1	5	5	5	4	5
1072	2021-02-03 18:29:19	2021-02-03 18:33:19	00:03:58.982000	1	2	2	1	5	Catalunya	1	6	1	14	2	2	2	3	2	No	Sí, por confinamiento por contacto estrecho o sospecha de COVID-19	0	4	0	0	0	0	0	0	0	0	7	11	37	55	2	3	1	2	1	3	0	6	1	0	4	1	2	6	4
1075	2021-02-03 18:49:14	2021-02-03 18:56:22	00:07:08.026000	2	2	2	1	5	Catalunya	2	1	10	10	3	2	2	1	1	Sí, anteriormente estaba sin actividad laboral	No	0	0	0	4	0	0	0	0	0	0	21	0	47	68	3	2	3	3	1	4	4	6	0	1	6	1	6	0	0
1077	2021-02-03 19:36:19	2021-02-03 19:44:20	00:08:00.038000	2	2	2	1	5	Catalunya	2	6	13	14	4	2	2	1	1	No	No	1	0	0	0	0	0	0	0	0	0	23	12	32	67	2	2	1	3	2	2	3	4	3	3	3	3	5	5	3
1079	2021-02-03 19:54:07	2021-02-03 20:07:25	00:13:17.990000	1	2	4	1	5	Catalunya	2	6	13	14	4	2	2	1	1	No	No	0	0	0	0	0	0	0	0	0	2	31	0	48	79	3	1	3	3	1	6	5	6	0	0	6	3	6	0	0
1080	2021-02-03 20:26:14	2021-02-03 20:38:10	00:11:55.997000	1	2	1	1	5	Catalunya	1	3	4	4	1	2	2	2	1	No	Sí, por confinamiento por contacto estrecho o sospecha de COVID-19	0	2	1	0	0	0	2	1	0	2	27	3	40	70	2	1	3	3	3	3	4	6	0	4	5	5	5	3	0
1083	2021-02-03 21:21:27	2021-02-03 21:27:03	00:05:36.960000	1	2	2	1	5	Catalunya	1	3	11	14	3	1	1	1	1	No	Sí, por problemas de salud psíquicos	1	0	0	0	0	0	0	0	0	0	38	4	39	81	2	1	3	3	5	6	6	6	0	1	6	5	6	2	1
1084	2021-02-03 21:21:04	2021-02-03 21:29:57	00:08:51.965000	1	2	2	1	5	Catalunya	2	3	11	14	2	1	1	1	1	No	No	1	0	0	0	0	0	0	0	0	0	19	0	41	60	3	3	3	2	4	5	0	6	0	1	3	1	6	0	0
1085	2021-02-03 21:21:25	2021-02-03 21:32:30	00:11:05.021000	1	2	2	1	5	Catalunya	1	3	1	14	1	2	2	1	1	No	No	0	2	0	0	0	2	0	0	0	0	14	0	29	43	1	3	3	2	1	2	2	6	0	1	3	2	3	0	0
1086	2021-02-03 21:36:43	2021-02-03 21:44:39	00:07:55.978000	1	2	1	1	5	Catalunya	1	3	2	2	1	2	2	1	1	No	No	0	2	0	0	0	2	0	0	0	0	37	15	41	93	3	1	1	3	1	5	5	4	4	3	6	6	6	5	3
1087	2021-02-03 21:49:19	2021-02-03 21:55:25	00:06:05.040000	1	2	1	1	5	Catalunya	2	1	10	10	2	1	1	1	1	No	No	1	0	0	0	0	0	0	0	0	0	11	7	23	41	1	3	2	2	1	2	1	0	0	1	3	1	4	3	3
1088	2021-02-03 21:40:23	2021-02-03 22:12:27	00:32:04.992000	1	2	2	1	5	Catalunya	1	3	13	14	2	2	2	3	2	No	Sí, por confinamiento por contacto estrecho o sospecha de COVID-19	0	0	2	2	0	2	1	1	0	0	22	11	28	61	1	2	1	2	1	4	4	4	3	1	5	4	3	3	3
1089	2021-02-03 22:07:57	2021-02-03 22:14:57	00:07:01.027000	1	2	3	1	5	Catalunya	2	2	6	14	4	1	1	1	1	No	No	1	0	0	0	0	0	0	0	0	0	14	0	43	57	3	3	3	2	4	1	0	6	0	0	6	1	6	0	0
1090	2021-02-03 22:34:31	2021-02-03 22:41:22	00:06:51.005000	1	2	2	1	5	Catalunya	1	3	13	14	2	2	2	3	2	No	Sí, por problemas de salud físicos	0	4	4	0	0	4	0	0	0	0	18	5	43	66	3	3	3	2	1	6	5	1	0	1	6	1	6	1	1
1091	2021-02-03 22:39:55	2021-02-03 22:47:18	00:07:24.010000	2	2	2	1	5	Catalunya	1	4	4	4	3	1	1	2	1	No	Sí, por confinamiento por contacto estrecho o sospecha de COVID-19	0	2	2	2	2	2	2	0	2	2	18	12	38	68	2	3	1	3	1	4	3	6	1	0	5	2	6	4	4
1092	2021-02-03 22:49:32	2021-02-03 22:57:22	00:07:50.016000	1	2	1	1	5	Catalunya	2	6	4	4	2	2	2	3	2	No	Sí, por confinamiento por contacto estrecho o sospecha de COVID-19	0	4	4	4	4	4	4	4	4	4	52	20	29	101	1	1	1	3	5	6	6	6	5	6	5	6	5	5	5
1094	2021-02-03 23:37:36	2021-02-03 23:43:14	00:05:37.997000	2	1	1	1	5	Catalunya	1	6	4	4	2	2	2	2	1	No	No	0	0	0	2	0	2	2	0	0	0	37	2	29	68	1	1	3	3	2	5	5	3	0	2	5	6	5	0	0
1095	2021-02-03 23:43:28	2021-02-03 23:47:48	00:04:19.978000	1	2	1	1	5	Catalunya	2	2	4	4	1	1	1	1	1	No	No	0	0	2	0	0	1	0	0	0	2	44	22	30	96	1	1	1	3	5	6	4	4	5	5	5	6	3	5	5
1096	2021-02-03 23:53:47	2021-02-03 23:59:39	00:05:51.043000	2	2	1	1	5	Catalunya	2	6	4	4	1	2	2	1	1	No	No	1	0	0	0	0	0	0	0	0	0	18	0	46	64	3	3	3	2	1	5	4	6	0	2	5	0	6	0	0
1097	2021-02-03 23:55:21	2021-02-04 00:00:05	00:04:45.034000	1	2	1	1	5	Catalunya	1	3	1	14	1	2	2	3	2	No	Sí, por confinamiento por contacto estrecho o sospecha de COVID-19	0	4	0	0	0	0	0	1	0	0	31	7	41	79	3	1	2	3	3	3	3	6	0	3	6	3	6	0	3
1098	2021-02-03 23:30:58	2021-02-04 00:25:12	00:54:13.997000	1	2	2	1	5	Catalunya	1	3	13	14	3	1	1	3	2	No	Sí, por confinamiento por contacto estrecho o sospecha de COVID-19	1	0	0	0	0	0	0	0	0	0	23	13	42	78	3	2	1	3	1	1	1	6	3	1	6	6	6	5	5
1101	2021-02-04 02:47:06	2021-02-04 02:59:07	00:12:01.008000	1	2	3	1	5	Catalunya	1	7	4	4	1	2	2	1	1	Sí, anteriormente estaba sin actividad laboral	No	0	2	2	2	2	1	2	0	0	0	31	1	34	66	2	1	3	2	3	6	6	6	0	0	6	6	3	0	1
1102	2021-02-04 06:41:44	2021-02-04 06:51:35	00:09:50.976000	1	2	1	1	5	Catalunya	1	4	4	4	3	1	1	1	1	No	No	0	2	0	2	2	0	2	1	0	0	31	8	33	72	2	1	2	3	4	3	4	6	3	2	6	6	5	3	0
1104	2021-02-04 09:06:18	2021-02-04 09:11:36	00:05:18.038000	2	2	2	1	5	Catalunya	1	4	4	4	4	1	1	1	1	No	Sí, por problemas de salud psíquicos	1	0	0	0	0	0	0	0	0	0	7	3	48	58	3	3	3	2	0	1	0	6	0	1	6	1	6	1	0
1106	2021-02-04 09:10:14	2021-02-04 09:17:09	00:06:54.979000	2	2	2	1	5	Catalunya	2	1	10	10	3	1	1	1	1	No	No	1	0	0	0	0	0	0	0	0	0	8	2	42	52	3	3	3	2	1	1	1	6	0	1	6	1	6	1	0
1107	2021-02-04 09:56:15	2021-02-04 10:02:35	00:06:19.987000	1	2	1	1	5	Catalunya	1	3	11	14	1	1	1	3	2	No	Sí, por confinamiento por contacto estrecho o sospecha de COVID-19	0	4	0	0	0	0	4	0	0	0	13	11	31	55	2	3	1	2	1	3	1	6	1	1	1	2	5	5	5
1108	2021-02-04 10:03:31	2021-02-04 10:08:46	00:05:15.014000	1	2	1	1	5	Catalunya	1	4	4	4	3	1	1	1	1	No	No	0	0	0	0	0	0	0	1	0	0	46	23	44	113	3	1	1	3	4	5	5	6	4	6	6	4	6	5	5
1109	2021-02-04 10:35:06	2021-02-04 10:44:10	00:09:03.024000	1	1	3	1	5	Catalunya	1	3	7	7	3	2	2	3	2	No	Sí, por problemas de salud físicos	0	2	4	0	0	4	0	0	0	0	52	15	28	95	1	1	1	3	6	6	6	4	0	5	5	6	5	5	4
1110	2021-02-04 10:47:37	2021-02-04 10:52:10	00:04:33.024000	1	2	4	1	5	Catalunya	2	6	7	7	4	2	2	1	1	No	No	1	0	0	0	0	0	0	0	0	0	6	6	42	54	3	3	2	2	0	4	0	6	5	1	4	0	5	0	0
1111	2021-02-04 10:48:24	2021-02-04 10:57:34	00:09:08.986000	1	2	3	1	5	Catalunya	2	6	7	7	4	1	1	3	2	No	Sí, por confinamiento por contacto estrecho o sospecha de COVID-19	0	0	0	0	0	0	3	0	0	0	16	0	45	61	3	3	3	2	3	5	2	6	0	1	6	2	6	0	0
1112	2021-02-04 11:08:47	2021-02-04 11:17:29	00:08:42.029000	1	2	1	1	5	Catalunya	2	7	4	4	2	2	2	1	1	No	No	1	0	0	0	0	0	0	0	0	0	16	10	38	64	2	3	1	2	0	5	4	6	3	1	5	0	5	3	1
1113	2021-02-04 11:19:35	2021-02-04 11:24:52	00:05:15.965000	2	2	4	1	5	Catalunya	2	3	7	7	4	2	2	1	1	No	No	1	0	0	0	0	0	0	0	0	0	47	11	25	83	1	1	1	3	6	5	6	4	0	6	2	5	6	5	1
1114	2021-02-04 12:16:59	2021-02-04 12:21:49	00:04:50.995000	1	2	4	1	5	Catalunya	2	3	7	7	4	2	2	1	1	No	No	0	0	2	0	0	0	2	0	1	0	29	12	25	66	1	1	1	2	4	4	3	6	1	2	3	2	4	4	4
1115	2021-02-04 12:17:30	2021-02-04 12:23:32	00:06:00.979000	1	2	4	1	5	Catalunya	2	3	7	7	4	2	2	4	2	No	Sí, por confinamiento por contacto estrecho o sospecha de COVID-19	0	4	4	0	2	4	4	4	4	4	22	12	29	63	1	2	1	2	3	3	3	6	2	2	2	3	6	3	3
1116	2021-02-04 13:22:30	2021-02-04 13:33:39	00:11:08.995000	1	2	2	1	5	Catalunya	2	1	10	10	3	2	2	4	2	No	No	0	0	2	0	0	1	2	1	1	0	39	12	34	85	2	1	1	3	3	6	5	6	0	5	5	5	5	1	1
1118	2021-02-04 13:40:53	2021-02-04 13:51:01	00:10:09.034000	1	2	4	1	5	Catalunya	1	6	7	7	4	2	2	4	2	No	Sí, por confinamiento por contacto estrecho o sospecha de COVID-19	1	0	0	0	0	0	0	0	0	0	13	4	34	51	2	3	3	2	1	2	1	6	0	1	3	3	5	1	2
1120	2021-02-04 14:26:29	2021-02-04 14:35:52	00:09:22.982000	1	2	4	1	5	Catalunya	1	3	7	7	4	2	2	1	1	No	No	1	0	0	0	0	0	0	0	0	0	13	3	48	64	3	3	3	2	1	3	1	6	0	1	6	1	6	1	1
1121	2021-02-04 14:28:31	2021-02-04 14:47:37	00:19:06.010000	2	2	2	1	5	Catalunya	1	16	9	14	1	1	1	1	1	No	No	0	2	4	0	0	0	1	1	2	0	32	3	45	80	3	1	3	3	3	4	5	6	0	2	6	2	6	1	1
1122	2021-02-04 15:23:48	2021-02-04 15:32:43	00:08:54.989000	1	2	4	1	5	Catalunya	2	2	7	7	4	1	1	1	1	No	No	1	0	0	0	0	0	0	0	0	0	38	4	37	79	2	1	3	3	6	6	5	4	1	1	6	6	6	2	1
1123	2021-02-04 16:11:16	2021-02-04 16:17:51	00:06:35.021000	1	2	2	1	5	Catalunya	2	1	7	7	4	2	2	1	1	No	No	0	0	0	0	0	2	0	0	2	0	47	14	33	94	2	1	1	3	3	6	6	4	5	5	5	6	5	3	3
1124	2021-02-04 16:58:37	2021-02-04 17:11:22	00:12:46.022000	1	2	4	1	5	Catalunya	2	3	7	7	4	1	1	2	1	No	No	1	0	0	0	0	0	0	0	0	0	17	6	35	58	2	3	2	2	1	3	1	6	0	1	3	2	4	3	1
1127	2021-02-04 17:51:19	2021-02-04 17:56:39	00:05:18.989000	2	2	3	1	5	Catalunya	2	3	7	7	4	2	2	3	2	No	Sí, por problemas de salud físicos	0	3	2	3	0	3	3	0	3	0	47	12	31	90	2	1	1	3	5	6	6	6	0	6	6	6	5	5	5
1129	2021-02-04 21:15:54	2021-02-04 21:29:15	00:13:21.014000	1	2	2	1	5	Catalunya	1	16	9	14	2	1	1	1	1	No	No	0	2	0	0	0	0	2	0	0	0	31	3	42	76	3	1	3	3	2	6	6	6	1	1	5	3	6	1	0
1130	2021-02-04 22:35:18	2021-02-04 22:42:25	00:07:06.989000	2	1	4	1	5	Catalunya	1	3	7	7	4	2	2	3	2	No	Sí, por problemas de salud físicos	0	4	0	4	0	4	4	0	0	0	38	13	31	82	2	1	1	3	3	5	4	4	5	5	5	5	3	1	1
1132	2021-02-05 12:07:41	2021-02-05 12:19:13	00:11:31.027000	1	2	3	1	5	Catalunya	1	3	13	14	3	1	1	1	1	No	No	1	0	0	0	0	0	0	0	0	0	12	1	32	45	2	3	3	2	1	1	1	0	0	0	1	6	6	1	0
1133	2021-02-05 13:27:47	2021-02-05 13:31:51	00:04:03.994000	2	2	2	1	5	Catalunya	2	2	2	2	1	2	2	1	1	No	No	0	2	2	0	0	2	0	0	0	0	23	11	29	63	1	2	1	2	2	5	5	4	5	0	1	5	2	4	2
1134	2021-02-05 19:48:38	2021-02-05 19:57:12	00:08:33.994000	2	2	3	1	5	Catalunya	2	6	4	4	4	2	2	3	2	No	Sí, por confinamiento por contacto estrecho o sospecha de COVID-19	0	3	0	0	0	3	3	0	3	0	36	4	39	79	2	1	3	3	3	6	6	6	0	1	6	5	6	2	2
1135	2021-02-05 21:28:30	2021-02-05 21:44:35	00:16:05.002000	1	2	3	1	5	Catalunya	1	3	2	2	4	2	2	2	1	No	Sí, por confinamiento por contacto estrecho o sospecha de COVID-19	1	0	0	0	0	0	0	0	0	0	52	20	20	92	1	1	1	3	6	6	6	6	5	5	5	6	6	5	5
1136	2021-02-06 09:06:12	2021-02-06 09:14:36	00:08:25.008000	2	2	4	1	5	Catalunya	2	8	7	7	4	1	1	3	2	No	Sí, por problemas de salud físicos	0	4	0	0	4	0	4	0	0	4	30	10	29	69	1	1	1	3	4	4	4	4	1	4	5	4	5	3	2
1137	2021-02-06 09:56:38	2021-02-06 10:07:16	00:10:37.978000	1	2	1	1	5	Catalunya	2	6	2	2	2	1	1	2	1	No	Sí, por confinamiento por contacto estrecho o sospecha de COVID-19	1	0	0	0	0	0	0	0	0	0	6	6	34	46	2	3	2	2	1	1	2	3	1	0	2	0	4	3	2
1139	2021-02-06 12:50:04	2021-02-06 12:57:18	00:07:13.987000	1	2	3	1	5	Catalunya	2	3	7	7	3	2	2	1	1	No	No	0	0	0	0	0	1	2	0	0	0	32	10	39	81	2	1	1	3	6	6	6	6	5	1	6	4	6	3	1
1141	2021-02-06 14:00:39	2021-02-06 14:03:26	00:02:45.974000	2	1	4	1	5	Catalunya	2	8	7	7	4	2	2	3	2	No	Sí, por confinamiento por contacto estrecho o sospecha de COVID-19	1	0	0	0	0	0	0	0	0	0	18	8	25	51	1	3	2	2	1	3	1	1	1	2	1	3	4	1	2
1143	2021-02-06 14:48:51	2021-02-06 15:03:58	00:15:07.978000	1	2	3	1	5	Catalunya	2	2	7	7	4	2	2	3	2	No	Sí, por problemas de salud físicos	1	0	0	0	0	0	0	0	0	0	25	2	24	51	1	2	3	2	2	6	1	1	1	2	1	5	5	1	0
1144	2021-02-06 15:54:12	2021-02-06 16:00:44	00:06:31.997000	1	1	1	1	5	Catalunya	1	4	5	14	1	1	1	3	2	No	Sí, por confinamiento por contacto estrecho o sospecha de COVID-19	0	0	4	4	0	0	4	0	0	0	33	16	31	80	2	1	1	3	5	3	3	4	3	3	3	5	4	4	4
1147	2021-02-06 20:57:30	2021-02-06 21:04:02	00:06:33.034000	2	2	3	1	5	Catalunya	2	3	11	14	4	2	2	3	2	No	Sí, por confinamiento por contacto estrecho o sospecha de COVID-19	1	0	0	0	0	0	0	0	0	0	30	13	25	68	1	1	1	3	3	5	2	4	3	3	3	4	3	3	3
1148	2021-02-06 21:43:22	2021-02-06 21:50:22	00:06:59.040000	2	2	3	1	5	Catalunya	2	3	7	7	3	2	2	2	1	No	Sí, por confinamiento por contacto estrecho o sospecha de COVID-19	0	0	1	0	1	0	0	0	0	0	12	0	37	49	2	3	3	2	3	3	3	4	0	0	0	0	6	0	0
1153	2021-02-07 14:22:22	2021-02-07 14:32:28	00:10:06.010000	1	2	1	1	5	Catalunya	1	4	4	4	2	1	1	1	1	No	No	0	0	2	0	0	2	2	0	0	0	49	6	29	84	1	1	2	3	6	6	6	6	0	5	5	6	4	0	4
1160	2021-02-08 13:30:05	2021-02-08 13:34:38	00:04:31.987000	1	2	2	1	5	Catalunya	2	6	2	2	4	2	2	3	2	No	Sí, por problemas de salud físicos	0	3	0	0	3	3	0	0	0	0	33	13	21	67	1	1	1	3	4	6	5	6	0	3	2	5	2	2	4
1161	2021-02-09 14:44:10	2021-02-09 14:52:13	00:08:02.976000	2	2	3	1	5	Catalunya	1	3	2	2	4	2	2	1	1	No	No	1	0	0	0	0	0	0	0	0	0	15	6	35	56	2	3	2	2	1	6	5	6	0	0	3	0	1	3	3
1162	2021-02-09 21:51:14	2021-02-09 21:58:52	00:07:38.006000	2	1	4	1	5	Catalunya	1	3	7	7	4	2	2	1	1	No	No	1	0	0	0	0	0	0	0	0	0	9	2	32	43	2	3	3	2	0	1	1	1	1	1	1	1	6	0	0
112	2021-01-29 22:21:24	2021-01-29 22:29:35	00:08:11.011000	1	1	1	1	5	Comunitat Valenciana	1	4	4	4	1	1	1	2	1	No	Sí, por confinamiento por contacto estrecho o sospecha de COVID-19	0	0	0	0	0	0	0	1	0	0	22	4	43	69	3	2	3	3	1	5	4	6	1	1	2	1	6	0	1
268	2021-01-30 20:14:23	2021-01-30 20:18:46	00:04:23.002000	1	2	1	1	5	Comunitat Valenciana	1	6	10	10	1	1	1	2	1	Sí, anteriormente estaba sin actividad laboral	Sí, por confinamiento por contacto estrecho o sospecha de COVID-19	0	0	1	0	0	0	0	1	0	0	13	11	37	61	2	3	1	2	1	5	3	6	1	0	3	1	6	5	2
271	2021-01-30 20:15:03	2021-01-30 20:20:17	00:05:13.027000	1	2	1	1	5	Comunitat Valenciana	1	2	10	10	3	1	1	1	1	No	No	0	0	2	0	0	2	0	0	0	2	15	2	39	56	2	3	3	2	1	5	4	6	1	1	3	1	6	1	0
285	2021-01-30 20:24:48	2021-01-30 20:35:00	00:10:11.021000	1	2	1	1	5	Comunitat Valenciana	1	4	4	4	1	1	1	1	1	No	No	0	0	0	0	0	1	1	0	0	0	17	8	32	57	2	3	2	2	1	3	1	4	2	1	2	1	5	3	1
315	2021-01-30 21:22:00	2021-01-30 21:37:35	00:15:35.971000	1	2	1	1	5	Comunitat Valenciana	1	3	13	14	1	1	1	2	1	Sí, anteriormente estaba sin actividad laboral	No	1	0	0	0	0	0	0	0	0	0	22	6	42	70	3	2	2	3	3	5	1	6	2	0	6	1	6	0	2
391	2021-01-30 22:43:52	2021-01-30 22:54:00	00:10:07.997000	1	2	2	1	5	Comunitat Valenciana	1	4	10	10	3	1	1	1	1	No	No	0	0	2	0	2	0	2	0	2	2	28	3	40	71	2	1	3	3	3	4	4	6	0	2	6	5	6	2	1
399	2021-01-30 22:40:44	2021-01-30 23:01:40	00:20:55.997000	1	2	1	1	5	Comunitat Valenciana	1	3	10	10	2	1	1	2	1	No	Sí, por confinamiento por contacto estrecho o sospecha de COVID-19	0	0	0	0	0	2	2	1	0	0	27	8	31	66	2	1	2	2	3	5	6	4	0	1	6	5	6	3	4
400	2021-01-30 22:57:38	2021-01-30 23:02:03	00:04:24.989000	1	2	1	1	5	Comunitat Valenciana	1	4	10	10	1	1	1	1	1	No	No	0	0	0	0	0	2	2	1	0	0	31	7	38	76	2	1	2	3	1	6	5	6	0	3	3	4	5	5	1
402	2021-01-30 23:01:52	2021-01-30 23:05:37	00:03:46.022000	1	2	1	1	5	Comunitat Valenciana	1	3	10	10	1	1	1	2	1	No	No	1	0	0	0	0	0	0	0	0	0	0	0	0	0	1	3	3	1	#NULL!	#NULL!	#NULL!	#NULL!	#NULL!	#NULL!	#NULL!	#NULL!	#NULL!	#NULL!	#NULL!
476	2021-01-31 09:10:49	2021-01-31 09:15:31	00:04:42.960000	1	2	1	1	5	Comunitat Valenciana	1	3	10	10	1	2	2	1	1	No	No	1	0	0	0	0	0	0	0	0	0	6	5	42	53	3	3	3	2	1	1	0	6	0	1	2	1	6	3	2
562	2021-01-31 13:49:13	2021-01-31 13:58:16	00:09:01.987000	1	2	1	1	5	Comunitat Valenciana	1	4	10	10	2	1	1	3	2	No	Sí, por confinamiento por contacto estrecho o sospecha de COVID-19	0	4	0	4	4	0	4	4	4	0	28	2	41	71	3	1	3	3	4	6	5	4	1	0	5	3	6	1	0
563	2021-01-31 13:54:58	2021-01-31 14:00:46	00:05:48.970000	1	1	1	1	5	Comunitat Valenciana	1	4	10	10	1	1	1	1	1	No	No	1	0	0	0	0	0	0	0	0	0	6	0	44	50	3	3	3	2	0	0	0	6	0	0	2	0	6	0	0
571	2021-01-31 14:23:47	2021-01-31 14:31:12	00:07:24.010000	1	2	1	1	5	Comunitat Valenciana	1	4	9	14	2	1	1	2	1	No	Sí, por confinamiento por contacto estrecho o sospecha de COVID-19	0	0	1	0	0	0	0	1	0	0	29	9	37	75	2	1	2	3	2	4	4	6	3	4	1	3	6	2	2
617	2021-01-31 21:37:37	2021-01-31 21:45:06	00:07:29.971000	1	2	1	1	5	Comunitat Valenciana	1	3	10	10	1	2	2	1	1	No	No	0	0	0	1	0	1	1	0	0	0	41	8	33	82	2	1	2	3	2	6	6	6	1	5	4	6	5	4	2
922	2021-02-02 09:29:50	2021-02-02 09:34:52	00:05:01.018000	1	2	1	1	5	Comunitat Valenciana	1	4	4	4	1	1	1	2	1	No	Sí, por confinamiento por contacto estrecho o sospecha de COVID-19	0	0	0	0	1	0	0	0	0	0	11	11	40	62	2	3	1	2	1	1	1	4	5	2	5	1	5	1	2
970	2021-02-02 17:33:29	2021-02-02 17:38:08	00:04:40.022000	1	2	1	1	5	Comunitat Valenciana	1	3	4	4	1	1	1	2	1	No	Sí, por confinamiento por contacto estrecho o sospecha de COVID-19	0	0	1	1	0	0	0	0	0	2	15	9	40	64	2	3	2	2	1	5	2	6	1	1	2	1	5	3	1
1001	2021-02-02 21:44:23	2021-02-02 21:49:42	00:05:20.026000	1	2	1	1	5	Comunitat Valenciana	1	4	4	4	1	1	1	1	1	No	No	0	0	2	0	0	2	0	1	0	0	20	17	38	75	2	2	1	3	3	2	1	6	5	2	5	1	6	5	4
1093	2021-02-03 22:55:06	2021-02-03 22:59:43	00:04:36.998000	1	2	3	1	5	Comunitat Valenciana	2	2	6	14	3	2	2	2	1	No	Sí, por confinamiento por contacto estrecho o sospecha de COVID-19	1	0	0	0	0	0	0	0	0	0	45	15	32	92	2	1	1	3	4	6	6	4	2	4	5	6	4	4	5
705	2021-02-01 13:49:18	2021-02-01 13:55:25	00:06:07.027000	1	2	1	1	5	Comunitat Valenciana	1	3	4	4	1	1	1	2	1	No	Sí, por confinamiento por contacto estrecho o sospecha de COVID-19	1	0	0	0	0	0	0	0	0	0	37	6	31	74	2	1	2	3	3	4	4	4	3	3	5	5	3	1	0
26	2021-01-29 15:25:41	2021-01-29 15:32:03	00:06:21.024000	1	2	3	1	5	Euskadi	1	3	4	4	4	2	2	3	2	No	Sí, por problemas de salud físicos	0	4	4	4	4	4	4	4	4	0	23	0	43	66	3	2	3	2	3	6	1	6	0	1	6	1	6	0	0
312	2021-01-30 21:27:31	2021-01-30 21:33:49	00:06:18	1	2	1	1	5	Euskadi	1	3	10	10	1	2	2	4	2	Sí, anteriormente estaba sin actividad laboral	No	0	2	2	0	0	0	0	0	0	0	27	22	45	94	3	1	1	3	5	5	5	6	5	0	5	0	6	6	6
376	2021-01-30 22:31:44	2021-01-30 22:37:22	00:05:37.997000	1	2	1	1	5	Euskadi	1	16	10	10	1	1	1	2	1	No	Sí, por confinamiento por contacto estrecho o sospecha de COVID-19	0	1	0	0	2	2	2	1	2	0	34	0	26	60	1	1	3	2	5	6	6	2	0	0	1	5	6	0	0
388	2021-01-30 22:40:46	2021-01-30 22:52:19	00:11:33.014000	1	2	1	1	5	Euskadi	1	3	10	10	1	2	2	2	1	No	Sí, por confinamiento por contacto estrecho o sospecha de COVID-19	1	0	0	0	0	0	0	0	0	0	19	13	42	74	3	3	1	3	0	5	0	6	0	5	4	1	6	4	6
470	2021-01-31 09:02:38	2021-01-31 09:07:50	00:05:11.990000	1	1	2	1	5	Euskadi	2	6	10	10	2	1	1	1	1	No	No	0	0	0	0	0	0	0	1	0	0	25	3	24	52	1	2	3	2	2	5	4	1	0	5	5	4	5	1	1
660	2021-02-01 12:01:23	2021-02-01 12:07:15	00:05:50.957000	1	2	1	1	5	Euskadi	1	4	4	4	1	1	1	2	1	No	Sí, por confinamiento por contacto estrecho o sospecha de COVID-19	1	0	0	0	0	0	0	0	0	0	27	3	25	55	1	1	3	2	2	2	3	2	0	3	4	3	4	2	1
670	2021-02-01 12:53:30	2021-02-01 12:57:55	00:04:24.989000	1	1	1	1	5	Euskadi	1	4	4	4	1	1	1	1	1	Sí, por primera vez en mi vida	No	1	0	0	0	0	0	0	0	0	0	5	2	42	49	3	3	3	2	0	1	1	4	0	0	6	0	6	0	0
673	2021-02-01 12:55:35	2021-02-01 13:04:04	00:08:28.982000	1	2	1	1	5	Euskadi	1	4	4	4	1	2	2	1	1	Sí, anteriormente estaba sin actividad laboral	No	0	0	1	0	0	0	2	1	0	0	44	17	22	83	1	1	1	3	5	4	5	3	4	6	2	6	5	1	4
674	2021-02-01 12:59:30	2021-02-01 13:04:25	00:04:54.019000	1	1	1	1	5	Euskadi	1	4	4	4	2	1	1	4	2	Sí, anteriormente estaba sin actividad laboral	No	1	0	0	0	0	0	0	0	0	0	11	2	42	55	3	3	3	2	3	3	0	6	1	1	5	1	6	0	0
749	2021-02-01 15:55:27	2021-02-01 16:03:31	00:08:04.963000	1	2	4	1	5	Euskadi	2	6	2	2	4	2	2	3	2	No	Sí, por confinamiento por contacto estrecho o sospecha de COVID-19	0	4	0	0	0	1	2	0	0	0	45	12	32	89	2	1	1	3	6	6	6	6	5	5	6	6	5	3	3
759	2021-02-01 16:41:31	2021-02-01 16:44:39	00:03:06.970000	1	1	1	1	5	Euskadi	2	6	2	2	1	2	2	1	1	No	No	0	2	0	0	0	0	2	0	2	0	26	22	34	82	2	2	1	3	3	2	2	6	3	2	3	2	4	6	6
823	2021-02-01 20:47:29	2021-02-01 21:05:25	00:17:56.026000	1	2	3	1	5	Euskadi	2	7	7	7	4	2	2	1	1	No	No	1	0	0	0	0	0	0	0	0	0	38	16	27	81	1	1	1	3	5	5	5	4	0	1	5	6	6	6	6
850	2021-02-01 21:37:49	2021-02-01 21:43:08	00:05:20.026000	1	2	2	1	5	Euskadi	2	2	4	4	2	1	1	2	1	No	Sí, por confinamiento por contacto estrecho o sospecha de COVID-19	1	0	0	0	0	0	0	0	0	0	29	10	35	74	2	1	1	3	1	3	1	6	2	4	4	5	4	3	3
879	2021-02-01 22:42:49	2021-02-01 22:48:12	00:05:22.013000	1	2	1	1	5	Euskadi	1	4	4	4	1	1	1	2	1	No	Sí, por confinamiento por contacto estrecho o sospecha de COVID-19	1	0	0	0	0	0	0	0	0	0	16	3	38	57	2	3	3	2	0	3	0	6	2	3	0	1	6	0	0
950	2021-02-02 12:52:05	2021-02-02 13:02:37	00:10:32.016000	1	2	2	1	5	Euskadi	1	4	4	4	3	1	1	1	1	No	No	1	0	0	0	0	0	0	0	0	0	28	8	40	76	2	1	2	3	3	3	3	6	1	2	5	3	5	1	0
962	2021-02-02 15:15:16	2021-02-02 15:19:34	00:04:17.040000	2	2	1	1	5	Euskadi	1	4	4	4	1	1	1	2	1	No	Sí, por confinamiento por contacto estrecho o sospecha de COVID-19	0	0	0	0	0	0	0	0	0	2	30	3	29	62	1	1	3	2	2	6	6	1	0	2	3	3	5	0	0
1027	2021-02-03 10:19:53	2021-02-03 10:24:58	00:05:04.992000	1	2	1	1	5	Euskadi	1	4	4	4	1	1	1	1	1	No	No	0	0	0	2	0	0	0	1	0	2	34	1	40	75	2	1	3	3	3	5	5	6	0	1	6	5	6	1	0
370	2021-01-30 22:28:32	2021-01-30 22:32:17	00:03:44.035000	1	2	1	1	5	Extremadura	1	1	10	10	3	1	1	1	1	No	No	1	0	0	0	0	0	0	0	0	0	34	9	36	79	2	1	2	3	2	3	3	3	0	5	6	6	6	3	3
372	2021-01-30 22:24:41	2021-01-30 22:34:49	00:10:09.034000	1	2	1	1	5	Extremadura	1	3	10	10	1	1	1	3	2	No	Sí, por confinamiento por contacto estrecho o sospecha de COVID-19	1	0	0	0	0	0	0	0	0	0	1	1	31	33	2	3	3	1	0	0	0	4	0	0	3	0	5	1	0
436	2021-01-30 23:48:47	2021-01-30 23:55:07	00:06:21.024000	1	2	2	1	5	Extremadura	1	17	10	10	3	1	1	1	1	No	No	0	2	0	0	0	0	0	0	0	0	40	3	30	73	1	1	3	3	5	4	4	6	1	3	5	5	3	1	0
697	2021-02-01 13:26:04	2021-02-01 13:38:23	00:12:18.979000	1	1	1	1	5	Extremadura	1	4	4	4	1	1	1	2	1	No	Sí, por confinamiento por contacto estrecho o sospecha de COVID-19	0	0	0	0	0	0	0	1	0	0	18	3	40	61	2	3	3	2	1	3	3	6	2	1	6	1	6	1	0
763	2021-02-01 16:56:07	2021-02-01 17:01:52	00:05:44.995000	1	1	1	1	5	Extremadura	1	4	4	4	2	1	1	1	1	No	No	1	0	0	0	0	0	0	0	0	0	18	8	36	62	2	3	2	2	3	3	1	6	4	4	2	0	5	3	0
918	2021-02-02 09:08:44	2021-02-02 09:15:54	00:07:10.013000	1	1	1	1	5	Extremadura	1	4	4	4	1	1	1	3	2	No	Sí, por problemas de salud físicos	0	3	0	3	0	3	0	0	0	0	30	13	37	80	2	1	1	3	3	3	4	6	2	2	2	3	6	2	2
947	2021-02-02 12:06:16	2021-02-02 12:21:27	00:15:09.965000	1	1	1	1	5	Extremadura	1	2	4	4	1	2	2	2	1	No	Sí, por confinamiento por contacto estrecho o sospecha de COVID-19	0	0	1	0	0	0	0	0	1	0	0	0	0	0	1	3	3	1	#NULL!	#NULL!	#NULL!	#NULL!	#NULL!	#NULL!	#NULL!	#NULL!	#NULL!	#NULL!	#NULL!
104	2021-01-29 21:46:30	2021-01-29 21:54:45	00:08:16.022000	1	1	2	1	5	Galicia	1	4	4	4	3	1	1	1	1	No	No	0	0	0	0	1	1	1	0	0	0	38	3	42	83	3	1	3	3	3	5	3	6	1	3	3	5	6	1	1
248	2021-01-30 18:50:06	2021-01-30 18:56:29	00:06:21.974000	1	2	1	1	5	Galicia	1	4	4	4	1	1	1	1	1	Sí, anteriormente estaba sin actividad laboral	No	1	0	0	0	0	0	0	0	0	0	37	17	33	87	2	1	1	3	4	5	5	4	5	3	4	3	5	6	2
272	2021-01-30 20:15:12	2021-01-30 20:20:36	00:05:22.963000	1	2	1	1	5	Galicia	1	3	10	10	1	1	1	1	1	No	No	0	0	0	0	0	2	2	1	0	0	25	3	47	75	3	2	3	3	1	6	4	6	0	1	6	1	6	0	2
305	2021-01-30 21:15:40	2021-01-30 21:24:30	00:08:51.014000	1	2	1	1	5	Galicia	1	3	10	10	1	1	1	1	1	No	No	0	0	0	0	2	0	2	0	0	0	38	7	29	74	1	1	2	3	5	5	5	6	3	3	4	5	3	3	0
389	2021-01-30 22:44:17	2021-01-30 22:52:33	00:08:16.973000	1	1	1	1	5	Galicia	1	17	10	10	1	1	1	1	1	Sí, por primera vez en mi vida	No	1	0	0	0	0	0	0	0	0	0	6	6	48	60	3	3	2	2	0	6	0	6	0	0	6	0	6	6	0
393	2021-01-30 22:48:19	2021-01-30 22:54:52	00:06:33.034000	1	2	1	1	5	Galicia	1	2	10	10	1	1	1	1	1	No	No	0	0	0	0	1	0	0	1	0	0	30	12	32	74	2	1	1	3	3	4	4	6	1	3	2	3	4	5	3
403	2021-01-30 23:02:32	2021-01-30 23:07:18	00:04:45.984000	1	1	1	1	5	Galicia	1	4	10	10	1	1	1	3	2	Sí, anteriormente estaba sin actividad laboral	No	0	4	4	4	4	4	4	4	4	4	42	16	37	95	2	1	1	3	4	6	5	6	4	4	4	6	5	4	4
593	2021-01-31 18:18:38	2021-01-31 18:25:59	00:07:20.986000	1	2	1	1	5	Galicia	1	3	10	10	1	1	1	1	1	No	No	0	0	0	0	0	0	1	0	0	0	42	6	23	71	1	1	2	3	5	6	5	4	1	3	5	6	2	3	1
714	2021-02-01 14:22:43	2021-02-01 14:27:34	00:04:52.032000	1	1	1	1	5	Galicia	1	1	4	4	2	1	1	1	1	No	No	1	0	0	0	0	0	0	0	0	0	19	5	35	59	2	3	3	2	2	1	1	6	0	3	3	3	6	3	1
765	2021-02-01 16:26:36	2021-02-01 17:05:44	00:39:09.043000	1	2	2	1	5	Galicia	1	4	9	14	3	3	1	1	1	No	No	1	0	0	0	0	0	0	0	0	0	15	1	42	58	3	3	3	2	1	3	1	6	0	4	5	1	5	1	0
929	2021-02-02 10:05:10	2021-02-02 10:09:37	00:04:26.976000	1	1	1	1	5	Galicia	1	6	4	4	2	2	2	4	2	No	No	1	0	0	0	0	0	0	0	0	0	36	17	37	90	2	1	1	3	4	4	3	6	4	3	6	6	6	4	5
936	2021-02-02 10:37:17	2021-02-02 10:41:14	00:03:55.958000	2	2	1	1	5	Galicia	1	4	4	4	1	1	1	1	1	No	No	1	0	0	0	0	0	0	0	0	0	0	0	42	42	3	3	3	2	0	0	0	6	0	0	4	0	6	0	0
958	2021-02-02 13:51:39	2021-02-02 14:01:26	00:09:45.965000	1	2	1	1	5	Galicia	1	3	4	4	3	1	1	1	1	No	No	0	0	0	0	1	0	0	0	0	0	13	8	21	42	1	3	2	2	1	4	1	1	1	1	1	0	2	4	2
1032	2021-02-03 10:45:56	2021-02-03 10:51:11	00:05:15.014000	1	1	1	1	5	Galicia	1	4	4	4	1	1	1	1	1	No	Sí, por confinamiento por contacto estrecho o sospecha de COVID-19	1	0	0	0	0	0	0	0	0	0	31	9	40	80	2	1	2	3	3	5	4	6	1	2	2	3	5	3	1
68	2021-01-29 18:42:12	2021-01-29 18:47:29	00:05:18.038000	1	2	2	1	5	Illes Balears	1	7	7	7	3	2	2	3	2	No	Sí, por problemas de salud físicos	0	3	3	0	0	3	3	0	3	0	51	25	29	105	1	1	1	3	6	6	5	4	6	6	5	6	6	6	6
166	2021-01-30 11:43:49	2021-01-30 12:01:46	00:17:58.013000	1	2	1	1	5	Illes Balears	1	3	4	4	2	1	1	3	2	No	Sí, por confinamiento por contacto estrecho o sospecha de COVID-19	0	4	0	4	4	4	4	0	0	0	31	9	27	67	1	1	2	3	3	5	5	4	1	2	4	5	4	2	3
169	2021-01-30 11:58:55	2021-01-30 12:05:39	00:06:45.043000	2	1	4	1	5	Illes Balears	1	6	7	7	4	2	2	1	1	No	No	0	0	2	2	2	2	2	0	0	0	19	0	34	53	2	3	3	2	0	5	5	6	0	1	3	1	0	0	0
570	2021-01-31 14:17:22	2021-01-31 14:24:26	00:07:05.002000	1	2	1	1	5	Illes Balears	2	1	4	4	2	1	1	2	1	No	No	1	0	0	0	0	0	0	0	0	0	8	13	47	68	3	3	1	3	0	2	1	6	4	2	6	0	6	4	3
636	2021-02-01 08:05:19	2021-02-01 08:11:22	00:06:02.016000	2	2	1	1	5	Illes Balears	1	2	4	4	1	1	1	1	1	No	No	0	0	2	0	0	2	2	0	0	0	43	21	33	97	2	1	1	3	4	5	6	6	5	5	5	6	6	5	3
916	2021-02-02 08:56:13	2021-02-02 09:01:23	00:05:11.040000	1	1	1	1	5	Illes Balears	1	6	4	4	1	1	1	1	1	Sí, por primera vez en mi vida	No	1	0	0	0	0	0	0	0	0	0	5	9	38	52	2	3	2	2	0	2	1	6	1	1	6	0	3	5	3
925	2021-02-02 09:48:13	2021-02-02 09:52:20	00:04:07.018000	1	1	1	1	5	Illes Balears	1	4	4	4	1	1	1	1	1	No	No	1	0	0	0	0	0	0	0	0	0	13	4	47	64	3	3	3	2	1	1	1	6	0	1	6	2	6	2	1
937	2021-02-02 10:38:44	2021-02-02 10:43:45	00:04:59.981000	1	2	1	1	5	Illes Balears	2	2	4	4	1	1	1	2	1	No	Sí, por confinamiento por contacto estrecho o sospecha de COVID-19	1	0	0	0	0	0	0	0	0	0	31	15	32	78	2	1	1	3	2	5	2	6	3	4	5	5	5	5	3
944	2021-02-02 11:31:13	2021-02-02 11:35:55	00:04:42.010000	1	2	1	1	5	Illes Balears	2	7	2	2	1	2	2	3	2	No	Sí, por problemas de salud físicos	0	4	0	4	4	0	4	0	4	0	48	19	32	99	2	1	1	3	6	5	6	2	6	5	5	6	6	3	6
1069	2021-02-03 17:24:03	2021-02-03 17:30:49	00:06:45.043000	2	1	2	1	5	Illes Balears	1	4	4	4	4	1	1	4	2	No	Sí, por confinamiento por contacto estrecho o sospecha de COVID-19	1	0	0	0	0	0	0	0	0	0	17	7	46	70	3	3	2	3	1	3	1	6	0	3	5	2	6	2	2
1076	2021-02-03 19:15:20	2021-02-03 19:24:16	00:08:56.026000	1	2	1	1	5	Illes Balears	2	6	10	10	1	1	1	3	2	No	Sí, por problemas de salud físicos	0	3	0	3	0	3	3	3	3	0	25	12	43	80	3	2	1	3	3	4	3	6	2	3	5	3	6	4	3
238	2021-01-30 18:14:27	2021-01-30 18:22:45	00:08:16.973000	1	2	1	1	5	La Rioja	2	3	4	4	1	1	1	1	1	Sí, anteriormente estaba sin actividad laboral	Sí, por confinamiento por contacto estrecho o sospecha de COVID-19	0	2	0	0	0	0	2	1	2	0	17	4	28	49	1	3	3	2	2	5	1	4	1	1	3	1	4	1	1
318	2021-01-30 21:31:45	2021-01-30 21:41:36	00:09:50.976000	2	2	2	1	5	La Rioja	1	3	10	10	3	1	1	1	1	No	No	1	0	0	0	0	0	0	0	0	0	16	5	39	60	2	3	3	2	1	5	3	6	1	2	6	2	6	0	3
323	2021-01-30 21:47:12	2021-01-30 21:55:37	00:08:23.971000	1	2	2	1	5	La Rioja	1	3	10	10	3	2	2	1	1	No	No	0	2	0	0	0	2	1	0	0	0	22	7	38	67	2	2	2	3	1	5	5	4	5	0	0	1	6	1	1
325	2021-01-30 21:53:28	2021-01-30 21:58:35	00:05:08.016000	1	2	1	1	5	La Rioja	1	3	10	10	3	1	1	2	1	No	No	1	0	0	0	0	0	0	0	0	0	48	11	41	100	3	1	1	3	6	6	6	6	0	4	6	6	6	6	5
349	2021-01-30 22:09:12	2021-01-30 22:14:29	00:05:18.038000	1	2	1	1	5	La Rioja	1	16	10	10	2	1	1	1	1	Sí, por primera vez en mi vida	No	0	0	0	0	0	0	0	1	0	0	26	10	43	79	3	2	1	3	2	4	4	6	2	1	4	1	6	4	4
367	2021-01-30 22:24:01	2021-01-30 22:30:13	00:06:12.038000	1	2	3	1	5	La Rioja	1	3	1	14	1	2	2	2	1	No	Sí, por confinamiento por contacto estrecho o sospecha de COVID-19	1	0	0	0	0	0	0	0	0	0	31	17	40	88	2	1	1	3	4	5	4	6	0	4	6	5	5	5	6
444	2021-01-31 00:19:53	2021-01-31 00:25:27	00:05:32.986000	1	2	1	1	5	La Rioja	1	3	10	10	1	2	2	1	1	No	No	1	0	0	0	0	0	0	0	0	0	18	6	26	50	1	3	2	2	1	5	4	4	0	0	1	1	3	3	2
82	2021-01-29 19:59:57	2021-01-29 20:04:12	00:04:14.016000	1	2	2	1	5	Madrid	2	7	7	7	3	2	2	3	2	No	Sí, por problemas de salud psíquicos	1	0	0	0	0	0	0	0	0	0	10	4	35	49	2	3	3	2	1	3	1	6	1	1	1	1	5	1	1
127	2021-01-30 07:58:49	2021-01-30 08:04:12	00:05:22.963000	1	2	3	1	5	Madrid	1	4	4	4	4	2	2	1	1	No	No	1	0	0	0	0	0	0	0	0	0	38	12	45	95	3	1	1	3	0	5	5	4	0	0	5	5	6	6	6
230	2021-01-30 17:03:11	2021-01-30 17:07:23	00:04:12.979000	1	2	1	1	5	Madrid	1	3	10	10	1	1	1	2	1	No	No	0	2	0	0	0	0	2	0	0	0	26	6	40	72	2	2	2	3	3	5	5	6	1	3	4	5	5	5	0
277	2021-01-30 20:24:17	2021-01-30 20:30:26	00:06:09.965000	1	1	1	1	5	Madrid	1	3	10	10	1	2	2	3	2	Sí, por primera vez en mi vida	Sí, por confinamiento por contacto estrecho o sospecha de COVID-19	1	0	0	0	0	0	0	0	0	0	20	7	28	55	1	2	2	2	2	4	1	2	0	2	1	0	6	1	3
282	2021-01-30 20:28:47	2021-01-30 20:33:36	00:04:49.008000	1	1	1	1	5	Madrid	1	3	10	10	1	2	2	3	2	No	No	0	0	2	0	0	0	2	0	0	0	18	5	30	53	1	3	3	2	3	4	3	0	0	0	5	1	6	0	4
283	2021-01-30 20:27:48	2021-01-30 20:33:55	00:06:07.027000	1	2	1	1	5	Madrid	1	4	10	10	1	1	1	2	1	No	Sí, por confinamiento por contacto estrecho o sospecha de COVID-19	0	0	0	0	0	0	2	1	0	0	24	0	40	64	2	2	3	2	3	5	3	6	0	1	5	2	6	0	0
328	2021-01-30 21:49:57	2021-01-30 22:03:00	00:13:02.006000	1	2	1	1	5	Madrid	1	4	10	10	2	1	1	2	1	No	Sí, por confinamiento por contacto estrecho o sospecha de COVID-19	0	0	0	0	2	0	0	0	0	0	30	0	43	73	3	1	3	3	3	6	4	6	0	0	6	3	6	0	0
331	2021-01-30 22:01:08	2021-01-30 22:04:37	00:03:29.002000	1	2	1	1	5	Madrid	1	3	10	10	1	2	2	2	1	No	Sí, por confinamiento por contacto estrecho o sospecha de COVID-19	0	2	2	0	2	2	0	1	0	2	28	5	42	75	3	1	3	3	3	5	4	6	1	1	5	3	6	2	1
334	2021-01-30 22:00:52	2021-01-30 22:07:31	00:06:38.995000	1	2	1	1	5	Madrid	1	3	10	10	1	1	1	4	2	No	Sí, por problemas de salud físicos	0	0	2	0	2	2	1	0	0	0	7	4	27	38	1	3	3	2	2	1	1	4	1	0	4	0	4	1	1
336	2021-01-30 22:03:00	2021-01-30 22:07:36	00:04:36.998000	1	2	1	1	5	Madrid	1	3	10	10	1	2	2	1	1	No	No	0	2	1	0	2	2	2	1	0	0	54	24	25	103	1	1	1	3	6	6	6	4	4	6	6	6	6	6	6
342	2021-01-30 22:02:04	2021-01-30 22:09:47	00:07:41.981000	1	2	2	1	5	Madrid	1	3	10	10	3	2	2	1	1	No	No	1	0	0	0	0	0	0	0	0	0	35	7	39	81	2	1	2	3	5	6	5	4	0	2	5	6	6	1	6
344	2021-01-30 22:02:53	2021-01-30 22:11:30	00:08:37.968000	1	2	3	1	5	Madrid	2	4	10	10	4	1	1	1	1	No	No	0	0	0	0	0	1	1	0	0	0	40	1	34	75	2	1	3	3	3	6	5	3	0	5	5	6	6	0	0
350	2021-01-30 22:10:36	2021-01-30 22:15:06	00:04:30	1	2	1	1	5	Madrid	1	4	10	10	1	1	1	3	2	Sí, anteriormente estaba sin actividad laboral	Sí, por confinamiento por contacto estrecho o sospecha de COVID-19	0	0	0	0	4	4	0	1	0	0	21	4	48	73	3	2	3	3	1	5	5	6	0	0	6	4	6	3	1
362	2021-01-30 22:18:19	2021-01-30 22:25:42	00:07:22.022000	1	2	1	1	5	Madrid	1	3	10	10	1	2	2	1	1	No	No	0	2	0	0	2	2	2	1	0	2	36	7	44	87	3	1	2	3	2	6	6	6	0	6	6	4	6	3	3
375	2021-01-30 22:30:19	2021-01-30 22:36:35	00:06:16.013000	1	2	2	1	5	Madrid	2	6	2	2	3	2	2	1	1	No	No	0	2	0	0	0	2	2	0	0	0	51	24	29	104	1	1	1	3	6	6	6	4	6	6	6	6	5	6	6
377	2021-01-30 22:32:59	2021-01-30 22:38:53	00:05:53.981000	1	2	1	1	5	Madrid	1	3	10	10	3	1	1	2	1	No	No	0	2	2	0	1	1	1	1	0	0	28	9	32	69	2	1	2	3	4	5	4	6	3	1	5	5	2	3	3
383	2021-01-30 22:41:38	2021-01-30 22:47:53	00:06:14.976000	1	1	2	1	5	Madrid	2	6	10	10	3	1	1	3	2	No	Sí, por confinamiento por contacto estrecho o sospecha de COVID-19	0	4	0	0	4	4	4	0	0	0	5	0	37	42	2	3	3	2	0	3	0	6	0	0	0	0	6	0	0
386	2021-01-30 22:45:42	2021-01-30 22:49:58	00:04:14.966000	1	2	2	1	5	Madrid	1	3	10	10	3	2	2	3	2	No	Sí, por confinamiento por contacto estrecho o sospecha de COVID-19	0	4	0	4	4	4	0	0	0	0	39	13	23	75	1	1	1	3	2	5	6	6	2	2	1	6	2	4	3
398	2021-01-30 22:53:08	2021-01-30 23:00:37	00:07:27.984000	1	2	1	1	5	Madrid	1	3	10	10	3	2	2	3	2	No	Sí, por confinamiento por contacto estrecho o sospecha de COVID-19	0	4	4	0	0	0	4	0	0	0	13	7	20	40	1	3	2	2	2	1	2	4	1	0	2	2	1	3	2
401	2021-01-30 23:00:11	2021-01-30 23:05:18	00:05:06.029000	1	2	3	1	5	Madrid	2	6	4	4	4	1	1	1	1	No	No	1	0	0	0	0	0	0	0	0	0	18	12	41	71	3	3	1	3	2	2	1	6	2	3	6	1	6	1	3
409	2021-01-30 23:07:48	2021-01-30 23:12:49	00:05:01.018000	1	2	3	1	5	Madrid	2	6	4	4	3	2	2	3	2	No	Sí, por problemas de salud físicos	0	4	0	4	4	4	4	0	4	0	37	20	24	81	1	1	1	3	2	5	5	6	5	5	4	4	4	4	4
412	2021-01-30 23:04:46	2021-01-30 23:14:56	00:10:09.984000	1	2	1	1	5	Madrid	1	3	10	10	1	2	2	3	2	Sí, anteriormente estaba sin actividad laboral	Sí, por confinamiento por contacto estrecho o sospecha de COVID-19	1	0	0	0	0	0	0	0	0	0	32	10	36	78	2	1	1	3	0	6	5	6	0	4	6	3	6	3	4
417	2021-01-30 23:13:12	2021-01-30 23:19:35	00:06:23.011000	1	2	2	1	5	Madrid	2	3	10	10	3	2	2	3	2	No	Sí, por confinamiento por contacto estrecho o sospecha de COVID-19	0	4	4	4	0	4	4	0	4	0	45	10	41	96	3	1	1	3	6	6	6	6	0	0	6	6	6	5	5
425	2021-01-30 23:27:32	2021-01-30 23:31:34	00:04:02.006000	1	2	1	1	5	Madrid	2	3	10	10	1	1	1	2	1	Sí, anteriormente estaba sin actividad laboral	Sí, por confinamiento por contacto estrecho o sospecha de COVID-19	1	0	0	0	0	0	0	0	0	0	33	23	36	92	2	1	1	3	4	3	4	6	6	3	5	6	6	6	6
428	2021-01-30 23:31:12	2021-01-30 23:36:42	00:05:30.998000	1	2	1	1	5	Madrid	1	6	10	10	2	1	1	3	2	No	Sí, por confinamiento por contacto estrecho o sospecha de COVID-19	0	4	0	0	4	4	0	0	0	0	46	11	25	82	1	1	1	3	5	6	4	4	0	5	4	6	4	5	5
441	2021-01-30 23:55:00	2021-01-31 00:02:24	00:07:24.010000	1	2	2	1	5	Madrid	2	3	10	10	3	2	2	3	2	No	Sí, por confinamiento por contacto estrecho o sospecha de COVID-19	0	4	4	4	4	4	4	0	4	0	37	13	36	86	2	1	1	3	5	5	4	6	2	4	4	5	4	4	5
452	2021-01-31 01:03:57	2021-01-31 01:11:07	00:07:10.013000	1	2	1	1	5	Madrid	1	3	10	10	1	2	2	3	2	No	Sí, por confinamiento por contacto estrecho o sospecha de COVID-19	1	0	0	0	0	0	0	0	0	0	3	0	36	39	2	3	3	2	1	1	0	6	0	0	2	0	4	0	0
466	2021-01-31 08:51:48	2021-01-31 08:55:24	00:03:36	1	2	2	1	5	Madrid	2	6	10	10	3	2	2	2	1	No	Sí, por confinamiento por contacto estrecho o sospecha de COVID-19	0	0	0	0	0	1	0	1	0	1	41	5	44	90	3	1	3	3	3	6	6	6	1	5	6	3	6	3	0
473	2021-01-31 09:03:55	2021-01-31 09:11:36	00:07:41.981000	1	2	1	1	5	Madrid	2	12	10	10	2	1	1	2	1	No	No	1	0	0	0	0	0	0	0	0	0	27	3	30	60	1	1	3	2	4	5	3	6	1	1	4	6	5	2	0
497	2021-01-31 10:02:32	2021-01-31 10:07:10	00:04:38.986000	1	2	1	1	5	Madrid	1	3	10	10	1	1	1	4	2	Sí, por primera vez en mi vida	Sí, por confinamiento por contacto estrecho o sospecha de COVID-19	0	4	4	0	4	4	4	4	4	0	44	14	43	101	3	1	1	3	3	6	5	6	2	5	5	6	6	3	3
504	2021-01-31 10:20:44	2021-01-31 10:25:59	00:05:15.965000	1	2	1	1	5	Madrid	1	3	10	10	1	1	1	3	2	No	Sí, por problemas de salud físicos	0	0	0	0	0	0	4	0	0	0	26	1	28	55	1	2	3	2	3	2	2	6	0	5	5	5	5	0	0
509	2021-01-31 10:39:19	2021-01-31 10:42:46	00:03:27.965000	1	2	1	1	5	Madrid	1	4	10	10	2	1	1	3	2	Sí, anteriormente estaba sin actividad laboral	No	0	4	0	4	0	0	0	0	0	0	0	0	0	0	1	3	3	1	#NULL!	#NULL!	#NULL!	#NULL!	#NULL!	#NULL!	#NULL!	#NULL!	#NULL!	#NULL!	#NULL!
526	2021-01-31 11:28:59	2021-01-31 11:33:03	00:04:03.994000	1	2	1	1	5	Madrid	2	16	10	10	3	2	2	1	1	No	No	0	2	0	0	0	2	2	0	2	0	35	12	42	89	3	1	1	3	2	5	6	6	0	1	4	6	5	5	3
534	2021-01-31 12:11:45	2021-01-31 12:20:50	00:09:05.962000	1	1	1	1	5	Madrid	1	4	10	10	2	1	1	2	1	Sí, anteriormente estaba sin actividad laboral	No	0	0	0	0	2	1	0	0	0	0	22	3	34	59	2	2	3	2	1	3	1	6	1	3	2	0	3	2	0
538	2021-01-31 12:40:19	2021-01-31 12:44:00	00:03:41.962000	1	2	1	1	5	Madrid	1	3	10	10	1	2	2	2	1	Sí, por primera vez en mi vida	Sí, por confinamiento por contacto estrecho o sospecha de COVID-19	1	0	0	0	0	0	0	0	0	0	37	10	31	78	2	1	1	3	5	5	5	4	1	3	3	4	5	4	3
611	2021-01-31 20:32:16	2021-01-31 20:37:36	00:05:20.026000	1	2	2	1	5	Madrid	2	16	4	4	4	1	1	2	1	No	Sí, por confinamiento por contacto estrecho o sospecha de COVID-19	0	2	0	0	2	0	1	0	0	0	40	9	43	92	3	1	2	3	1	6	6	6	3	6	6	3	6	2	0
653	2021-02-01 11:00:25	2021-02-01 11:09:58	00:09:34.042000	2	1	2	1	5	Madrid	1	1	4	4	3	1	1	1	1	No	Sí, por confinamiento por contacto estrecho o sospecha de COVID-19	0	0	2	0	0	0	0	0	0	0	11	2	43	56	3	3	3	2	1	1	0	6	1	1	5	0	6	0	0
728	2021-02-01 14:50:56	2021-02-01 14:54:41	00:03:44.986000	2	1	1	1	5	Madrid	1	4	7	7	1	2	2	2	1	No	Sí, por confinamiento por contacto estrecho o sospecha de COVID-19	1	0	0	0	0	0	0	0	0	0	0	0	0	0	1	3	3	1	#NULL!	#NULL!	#NULL!	#NULL!	#NULL!	#NULL!	#NULL!	#NULL!	#NULL!	#NULL!	#NULL!
766	2021-02-01 16:55:41	2021-02-01 17:07:51	00:12:09.994000	1	2	1	1	5	Madrid	1	3	4	4	1	1	1	2	1	Sí, anteriormente estaba sin actividad laboral	Sí, por confinamiento por contacto estrecho o sospecha de COVID-19	0	0	0	0	0	1	0	0	0	0	31	9	35	75	2	1	2	3	5	4	4	6	2	2	5	4	5	3	3
768	2021-02-01 17:12:00	2021-02-01 17:15:31	00:03:30.989000	1	1	1	1	5	Madrid	1	6	4	4	1	1	1	3	2	No	Sí, por confinamiento por contacto estrecho o sospecha de COVID-19	0	4	0	0	0	0	0	0	0	0	36	23	36	95	2	1	1	3	6	2	3	4	6	4	6	5	6	6	6
902	2021-02-02 00:39:34	2021-02-02 00:44:35	00:05:01.968000	1	2	1	1	5	Madrid	1	4	4	4	1	1	1	2	1	No	Sí, por confinamiento por contacto estrecho o sospecha de COVID-19	0	2	0	0	2	2	2	0	2	0	33	11	40	84	2	1	1	3	2	3	4	6	5	5	6	5	5	4	2
903	2021-02-02 00:44:09	2021-02-02 00:51:28	00:07:18.998000	1	1	1	1	5	Madrid	2	2	4	4	3	1	1	2	1	No	Sí, por confinamiento por contacto estrecho o sospecha de COVID-19	1	0	0	0	0	0	0	0	0	0	11	3	41	55	3	3	3	2	1	3	1	6	0	1	3	1	5	1	0
915	2021-02-02 08:53:43	2021-02-02 09:00:48	00:07:05.002000	1	2	1	1	5	Madrid	1	6	4	4	1	1	1	1	1	No	No	1	0	0	0	0	0	0	0	0	0	33	3	42	78	3	1	3	3	1	5	3	6	2	3	6	3	5	0	0
932	2021-02-02 10:20:11	2021-02-02 10:25:09	00:04:56.957000	1	1	1	1	5	Madrid	1	3	4	4	3	2	2	1	1	No	Sí, por confinamiento por contacto estrecho o sospecha de COVID-19	1	0	0	0	0	0	0	0	0	0	38	7	37	82	2	1	2	3	6	4	4	6	1	4	0	5	6	3	1
935	2021-02-02 10:31:44	2021-02-02 10:39:01	00:07:17.011000	1	2	2	1	5	Madrid	1	3	4	4	1	1	1	3	2	No	Sí, por problemas de salud físicos	0	3	0	3	3	3	3	0	0	0	30	15	35	80	2	1	1	3	2	6	6	6	3	2	2	2	6	5	5
949	2021-02-02 12:11:43	2021-02-02 12:31:56	00:20:12.019000	1	2	1	1	5	Madrid	1	4	4	4	3	1	1	1	1	No	No	0	0	0	0	0	1	0	0	2	0	11	5	40	56	2	3	3	2	2	2	1	6	0	1	1	1	6	2	1
954	2021-02-02 13:16:42	2021-02-02 13:26:55	00:10:13.008000	1	1	2	1	5	Madrid	1	3	4	4	3	1	1	1	1	No	Sí, por confinamiento por contacto estrecho o sospecha de COVID-19	1	0	0	0	0	0	0	0	0	0	15	5	33	53	2	3	3	2	1	1	0	6	3	2	2	1	5	1	1
977	2021-02-02 18:17:37	2021-02-02 18:22:43	00:05:06.979000	1	2	3	1	5	Madrid	2	7	4	4	4	2	2	1	1	No	No	1	0	0	0	0	0	0	0	0	0	51	17	40	108	2	1	1	3	6	6	6	6	4	5	5	6	6	6	6
985	2021-02-02 19:13:49	2021-02-02 19:25:10	00:11:22.042000	1	1	3	1	5	Madrid	1	7	7	7	3	2	2	3	2	No	Sí, por problemas de salud físicos	0	3	0	0	0	0	0	1	0	0	4	3	13	20	1	3	3	1	0	1	1	4	1	1	0	0	1	2	0
1004	2021-02-02 22:12:45	2021-02-02 22:16:40	00:03:55.958000	1	2	2	1	5	Madrid	1	4	4	4	3	1	1	1	1	No	No	1	0	0	0	0	0	0	0	0	0	35	11	41	87	3	1	1	3	5	5	3	4	2	3	5	3	5	5	1
1012	2021-02-02 23:42:10	2021-02-02 23:46:24	00:04:14.966000	1	2	1	1	5	Madrid	1	11	4	4	1	1	1	1	1	No	Sí, por confinamiento por contacto estrecho o sospecha de COVID-19	0	2	2	0	0	2	2	0	2	0	51	25	36	112	2	1	1	3	5	6	6	6	5	6	4	6	5	5	4
1023	2021-02-03 09:34:46	2021-02-03 09:39:18	00:04:31.987000	1	2	1	1	5	Madrid	1	3	4	4	1	2	2	2	1	Sí, por primera vez en mi vida	Sí, por confinamiento por contacto estrecho o sospecha de COVID-19	1	0	0	0	0	0	0	0	0	0	36	7	36	79	2	1	2	3	2	6	6	4	0	1	3	6	6	3	2
1025	2021-02-03 09:35:37	2021-02-03 09:43:15	00:07:38.957000	1	2	1	1	5	Madrid	1	4	4	4	2	1	1	3	2	No	Sí, por confinamiento por contacto estrecho o sospecha de COVID-19	0	3	2	2	0	3	0	0	0	0	20	17	43	80	3	2	1	3	2	5	2	6	4	2	6	1	6	4	1
1037	2021-02-03 11:52:25	2021-02-03 11:57:52	00:05:25.987000	1	2	1	1	5	Madrid	1	6	4	4	1	2	2	3	2	No	Sí, por confinamiento por contacto estrecho o sospecha de COVID-19	0	4	0	4	2	2	2	1	0	2	29	14	39	82	2	1	1	3	3	5	5	4	5	1	6	4	6	3	3
1048	2021-02-03 14:40:22	2021-02-03 14:44:31	00:04:09.005000	1	2	1	1	5	Madrid	1	3	4	4	2	1	1	3	2	No	Sí, por confinamiento por contacto estrecho o sospecha de COVID-19	0	3	3	2	0	2	2	1	3	0	45	20	41	106	3	1	1	3	4	6	5	4	5	6	5	5	6	5	5
1059	2021-02-03 16:11:35	2021-02-03 16:17:57	00:06:21.974000	1	2	1	1	5	Madrid	1	4	4	4	1	1	1	1	1	No	No	0	0	2	0	0	0	0	1	0	0	18	3	40	61	2	3	3	2	1	4	2	6	0	1	4	1	6	1	1
1060	2021-02-03 16:14:19	2021-02-03 16:23:01	00:08:42.979000	1	2	1	1	5	Madrid	1	4	4	4	1	1	1	4	2	No	Sí, por confinamiento por contacto estrecho o sospecha de COVID-19	0	4	4	4	4	4	4	1	4	0	41	17	35	93	2	1	1	3	5	5	5	4	3	5	6	5	6	4	3
1074	2021-02-03 18:44:28	2021-02-03 18:50:51	00:06:23.011000	1	1	1	1	5	Madrid	1	4	4	4	1	1	1	3	2	No	Sí, por problemas de salud físicos	0	4	4	4	4	4	4	0	4	4	21	8	41	70	3	2	2	3	2	3	4	6	2	1	4	1	4	2	0
1131	2021-02-04 23:13:29	2021-02-04 23:23:28	00:09:59.011000	1	2	4	1	5	Madrid	2	17	6	14	4	2	2	1	1	No	No	0	0	2	0	1	1	1	0	2	0	34	2	31	67	2	1	3	3	4	3	3	6	0	3	3	6	3	1	0
1157	2021-02-07 18:34:25	2021-02-07 18:37:32	00:03:06.970000	1	2	3	1	5	Madrid	1	4	4	4	4	1	1	4	2	No	No	1	0	0	0	0	0	0	0	0	0	34	13	38	85	2	1	1	3	2	5	4	4	1	3	6	5	5	4	4
306	2021-01-30 21:17:18	2021-01-30 21:25:24	00:08:07.037000	1	2	1	1	5	Murcia	1	3	10	10	2	2	2	2	1	Sí, anteriormente estaba sin actividad laboral	No	0	0	0	0	0	0	0	1	0	0	5	11	31	47	2	3	1	2	1	1	1	4	0	1	6	1	4	4	3
468	2021-01-31 08:58:31	2021-01-31 09:03:36	00:05:04.992000	1	2	1	1	5	Murcia	1	6	10	10	2	2	2	1	1	No	No	1	0	0	0	0	0	0	0	0	0	8	4	39	51	2	3	3	2	1	1	0	4	0	1	5	1	5	3	1
469	2021-01-31 08:59:09	2021-01-31 09:06:21	00:07:12	1	2	2	1	5	Murcia	1	3	10	10	3	2	2	1	1	No	No	1	0	0	0	0	0	0	0	0	0	27	11	34	72	2	1	1	3	3	2	2	6	2	3	5	3	6	5	3
471	2021-01-31 08:59:42	2021-01-31 09:08:33	00:08:51.965000	1	2	1	1	5	Murcia	2	3	10	10	1	1	1	3	2	No	Sí, por confinamiento por contacto estrecho o sospecha de COVID-19	0	4	0	4	0	4	0	0	0	0	15	3	38	56	2	3	3	2	3	4	2	4	1	1	2	1	6	0	1
477	2021-01-31 09:00:20	2021-01-31 09:17:42	00:17:21.034000	1	2	3	1	5	Murcia	2	6	10	10	2	1	1	3	2	No	Sí, por confinamiento por contacto estrecho o sospecha de COVID-19	0	2	1	2	4	1	4	4	0	2	29	8	40	77	2	1	2	3	1	5	4	1	1	5	6	3	5	6	1
478	2021-01-31 09:07:06	2021-01-31 09:18:17	00:11:10.982000	1	2	3	1	5	Murcia	1	17	10	10	1	1	1	2	1	No	Sí, por confinamiento por contacto estrecho o sospecha de COVID-19	0	2	0	0	0	0	0	1	0	0	3	1	37	41	2	3	3	2	1	0	0	0	0	0	1	0	6	1	0
488	2021-01-31 09:31:59	2021-01-31 09:37:02	00:05:01.968000	1	1	2	1	5	Murcia	2	3	10	10	3	1	1	1	1	No	No	1	0	0	0	0	0	0	0	0	0	9	7	40	56	2	3	2	2	1	1	1	6	1	2	6	1	5	3	1
496	2021-01-31 09:55:35	2021-01-31 10:01:13	00:05:39.034000	1	2	1	1	5	Murcia	1	3	10	10	1	1	1	1	1	No	No	0	2	2	0	0	0	0	1	0	0	32	9	44	85	3	1	2	3	3	6	5	6	0	1	6	5	6	4	5
501	2021-01-31 10:11:18	2021-01-31 10:19:17	00:07:59.002000	1	2	1	1	5	Murcia	1	3	10	10	1	1	1	2	1	No	No	0	0	0	0	1	0	0	0	0	0	41	14	27	82	1	1	1	3	5	6	5	6	1	1	1	6	3	5	2
507	2021-01-31 10:30:10	2021-01-31 10:36:18	00:06:07.027000	1	2	1	1	5	Murcia	1	3	10	10	3	1	1	1	1	No	No	0	0	2	0	0	2	0	0	0	0	16	11	35	62	2	3	1	2	4	4	0	6	0	0	2	3	4	6	5
542	2021-01-31 12:43:25	2021-01-31 12:51:21	00:07:55.027000	1	2	1	1	5	Murcia	1	3	10	10	1	3	1	1	1	No	No	0	0	0	0	0	0	1	0	0	0	33	8	41	82	3	1	2	3	3	5	3	6	1	5	5	4	5	3	2
566	2021-01-31 13:57:41	2021-01-31 14:07:11	00:09:31.018000	1	1	2	1	5	Murcia	1	3	10	10	3	1	1	3	2	No	Sí, por confinamiento por contacto estrecho o sospecha de COVID-19	0	3	0	3	3	0	0	0	0	0	15	4	43	62	3	3	3	2	0	3	3	4	0	0	6	1	6	3	0
600	2021-01-31 19:16:19	2021-01-31 19:21:22	00:05:03.005000	1	2	2	1	5	Murcia	2	6	10	10	1	1	1	1	1	Sí, anteriormente estaba sin actividad laboral	No	0	0	0	0	0	0	0	1	0	0	13	0	48	61	3	3	3	2	3	5	1	6	0	0	6	1	6	0	0
614	2021-01-31 21:00:57	2021-01-31 21:06:26	00:05:29.962000	1	2	1	1	5	Murcia	1	3	10	10	1	2	2	3	2	No	Sí, por problemas de salud físicos	0	3	0	3	0	3	3	0	3	0	15	4	40	59	2	3	3	2	5	5	0	6	0	0	0	0	6	4	0
646	2021-02-01 09:50:25	2021-02-01 10:02:32	00:12:08.006000	1	2	4	1	5	Murcia	2	3	10	10	2	1	1	1	1	No	No	0	0	0	0	0	1	0	0	0	0	9	15	35	59	2	3	1	2	1	1	1	6	1	1	4	1	4	5	3
906	2021-02-02 07:19:34	2021-02-02 07:24:29	00:04:54.970000	1	2	1	1	5	Murcia	1	4	4	4	1	1	1	1	1	Sí, por primera vez en mi vida	No	0	2	0	0	1	0	2	0	0	0	40	9	35	84	2	1	2	3	4	5	6	4	4	3	6	5	6	4	0
934	2021-02-02 10:28:52	2021-02-02 10:35:10	00:06:18	1	1	1	1	5	Murcia	1	4	4	4	1	1	1	2	1	No	Sí, por confinamiento por contacto estrecho o sospecha de COVID-19	0	0	0	0	0	2	1	1	0	0	46	27	24	97	1	1	1	3	6	5	4	3	6	5	2	6	5	6	6
1020	2021-02-03 08:48:18	2021-02-03 08:54:27	00:06:09.965000	1	2	3	1	5	Murcia	2	3	10	10	1	2	2	2	1	No	Sí, por confinamiento por contacto estrecho o sospecha de COVID-19	1	0	0	0	0	0	0	0	0	0	6	1	46	53	3	3	3	2	1	1	1	6	0	0	6	1	6	0	1
1125	2021-02-04 17:36:34	2021-02-04 17:48:07	00:11:31.978000	1	2	2	1	5	Murcia	2	6	10	10	3	1	1	3	2	Sí, anteriormente estaba sin actividad laboral	Sí, por problemas de salud físicos	0	0	0	0	0	0	0	0	0	1	16	2	25	43	1	3	3	2	3	4	3	6	0	1	2	2	4	2	0
1145	2021-02-06 16:14:01	2021-02-06 16:20:12	00:06:11.002000	1	2	4	1	5	Murcia	2	3	1	14	3	2	2	1	1	No	No	1	0	0	0	0	0	0	0	0	0	0	0	0	0	1	3	3	1	#NULL!	#NULL!	#NULL!	#NULL!	#NULL!	#NULL!	#NULL!	#NULL!	#NULL!	#NULL!	#NULL!
1146	2021-02-06 17:14:07	2021-02-06 17:20:39	00:06:33.034000	1	2	2	1	5	Murcia	2	3	1	14	1	2	2	3	2	No	Sí, por confinamiento por contacto estrecho o sospecha de COVID-19	0	1	0	0	4	4	4	1	0	0	30	17	40	87	2	1	1	3	5	6	6	6	0	0	6	1	6	6	5
384	2021-01-30 22:42:27	2021-01-30 22:47:58	00:05:30.998000	1	2	1	1	5	Navarra	1	4	10	10	1	1	1	2	1	No	Sí, por confinamiento por contacto estrecho o sospecha de COVID-19	0	2	0	0	1	1	2	0	0	0	43	9	33	85	2	1	2	3	4	6	6	6	3	4	3	5	6	6	0
663	2021-02-01 12:32:46	2021-02-01 12:38:24	00:05:39.034000	1	2	1	1	5	Navarra	1	4	4	4	1	1	1	2	1	No	Sí, por confinamiento por contacto estrecho o sospecha de COVID-19	1	0	0	0	0	0	0	0	0	0	20	6	34	60	2	2	2	2	4	2	0	6	0	2	6	3	5	0	5
385	2021-01-30 22:45:37	2021-01-30 22:49:30	00:03:53.021000	1	2	1	1	5	Principado de Asturias	2	3	10	10	3	2	2	2	1	No	Sí, por confinamiento por contacto estrecho o sospecha de COVID-19	1	0	0	0	0	0	0	0	0	0	14	0	44	58	3	3	3	2	0	6	5	6	0	0	6	0	6	0	0
424	2021-01-30 23:21:35	2021-01-30 23:27:34	00:05:58.992000	1	2	2	1	5	Principado de Asturias	2	3	10	10	2	2	2	2	1	No	Sí, por confinamiento por contacto estrecho o sospecha de COVID-19	0	0	0	2	0	0	2	0	0	0	27	0	43	70	3	1	3	3	4	5	5	6	0	0	6	5	5	0	0
475	2021-01-31 09:09:57	2021-01-31 09:14:53	00:04:54.970000	1	1	1	1	5	Principado de Asturias	1	4	10	10	1	1	1	2	1	No	Sí, por confinamiento por contacto estrecho o sospecha de COVID-19	1	0	0	0	0	0	0	0	0	0	2	0	42	44	3	3	3	2	0	0	0	6	0	0	0	0	6	0	0
484	2021-01-31 09:14:13	2021-01-31 09:25:10	00:10:56.035000	1	2	1	1	5	Principado de Asturias	1	4	10	10	1	1	1	1	1	No	No	1	0	0	0	0	0	0	0	0	0	16	0	45	61	3	3	3	2	3	2	1	6	0	0	6	2	6	0	0
676	2021-02-01 12:57:09	2021-02-01 13:05:55	00:08:46.003000	1	2	1	1	5	Principado de Asturias	1	4	4	4	1	1	1	3	2	No	Sí, por confinamiento por contacto estrecho o sospecha de COVID-19	0	3	0	3	0	3	3	0	3	0	12	6	25	43	1	3	2	2	2	2	1	6	2	1	2	1	3	1	1
677	2021-02-01 13:02:02	2021-02-01 13:06:44	00:04:42.960000	1	2	2	1	5	Principado de Asturias	1	4	4	4	3	1	1	3	2	No	Sí, por confinamiento por contacto estrecho o sospecha de COVID-19	0	3	0	3	0	3	3	1	3	0	22	1	48	71	3	2	3	3	0	5	4	6	1	1	6	1	6	0	0
680	2021-02-01 13:04:32	2021-02-01 13:12:31	00:07:59.002000	1	2	1	1	5	Principado de Asturias	1	3	10	10	1	1	1	1	1	Sí, por primera vez en mi vida	No	0	0	0	0	2	2	2	0	0	0	18	2	37	57	2	3	3	2	2	3	3	6	0	1	3	0	6	2	0
681	2021-02-01 13:09:23	2021-02-01 13:15:34	00:06:11.002000	1	2	2	1	5	Principado de Asturias	2	14	10	10	3	1	1	1	1	No	No	0	0	0	0	1	1	1	1	0	0	27	5	40	72	2	1	3	3	3	5	5	6	0	1	5	3	5	2	2
682	2021-02-01 13:10:53	2021-02-01 13:16:35	00:05:41.021000	1	2	1	1	5	Principado de Asturias	1	4	10	10	1	1	1	2	1	No	Sí, por confinamiento por contacto estrecho o sospecha de COVID-19	0	2	2	2	1	1	1	1	1	2	47	2	24	73	1	1	3	3	6	6	6	6	0	3	6	6	1	0	1
684	2021-02-01 13:12:01	2021-02-01 13:17:27	00:05:27.024000	1	1	1	1	5	Principado de Asturias	1	3	10	10	1	1	1	3	2	No	Sí, por confinamiento por contacto estrecho o sospecha de COVID-19	0	0	0	0	0	4	4	4	4	0	28	11	32	71	2	1	1	3	1	6	1	4	1	4	0	1	6	5	0
691	2021-02-01 13:22:56	2021-02-01 13:28:32	00:05:36.960000	1	2	3	1	5	Principado de Asturias	2	3	10	10	1	1	1	1	1	No	No	1	0	0	0	0	0	0	0	0	0	0	7	47	54	3	3	2	2	0	0	0	6	0	0	5	0	6	1	0
696	2021-02-01 13:21:00	2021-02-01 13:36:47	00:15:47.981000	1	2	1	1	5	Principado de Asturias	1	3	10	10	1	1	1	1	1	No	No	0	0	0	0	0	0	1	0	0	0	49	14	26	89	1	1	1	3	6	5	6	4	6	6	4	6	4	6	1
706	2021-02-01 14:00:30	2021-02-01 14:07:53	00:07:22.973000	1	2	1	1	5	Principado de Asturias	1	3	10	10	2	1	1	1	1	No	No	1	0	0	0	0	0	0	0	0	0	25	9	30	64	1	2	2	2	1	5	3	3	1	4	1	3	4	4	3
718	2021-02-01 14:28:16	2021-02-01 14:31:41	00:03:25.027000	1	2	1	1	5	Principado de Asturias	1	3	10	10	1	2	2	4	2	No	No	0	0	2	0	0	0	0	0	0	0	43	23	24	90	1	1	1	3	5	5	4	4	4	5	3	6	4	6	6
743	2021-02-01 15:41:17	2021-02-01 15:47:14	00:05:58.042000	1	2	1	1	5	Principado de Asturias	1	3	10	10	1	1	1	1	1	No	No	1	0	0	0	0	0	0	0	0	0	30	6	32	68	2	1	2	3	4	3	3	3	0	3	6	5	3	3	1
751	2021-02-01 16:14:57	2021-02-01 16:22:23	00:07:25.997000	2	2	2	1	5	Principado de Asturias	2	6	10	10	3	1	1	1	1	No	No	0	0	0	2	0	2	2	0	0	0	36	8	30	74	1	1	2	3	5	5	3	6	0	4	0	4	2	4	4
757	2021-02-01 16:32:47	2021-02-01 16:39:29	00:06:42.019000	1	2	1	1	5	Principado de Asturias	1	3	10	10	1	1	1	2	1	No	No	1	0	0	0	0	0	0	0	0	0	25	3	38	66	2	2	3	2	3	5	4	6	0	1	1	1	6	2	1
781	2021-02-01 17:54:16	2021-02-01 18:54:10	00:59:53.981000	1	2	1	1	5	Principado de Asturias	1	3	10	10	2	1	1	1	1	No	No	1	0	0	0	0	0	0	0	0	0	11	3	34	48	2	3	3	2	3	4	0	4	0	0	2	1	6	1	1
808	2021-02-01 20:32:12	2021-02-01 20:36:55	00:04:42.960000	1	2	1	1	5	Principado de Asturias	1	3	10	10	1	1	1	1	1	Sí, por primera vez en mi vida	Sí, por confinamiento por contacto estrecho o sospecha de COVID-19	1	0	0	0	0	0	0	0	0	0	32	14	26	72	1	1	1	3	4	3	4	3	2	4	5	4	4	5	5
908	2021-02-02 08:00:11	2021-02-02 08:07:00	00:06:49.968000	1	2	1	1	5	Principado de Asturias	1	4	10	10	2	1	1	1	1	No	No	0	0	1	0	0	0	0	0	0	0	4	0	48	52	3	3	3	2	0	1	0	6	0	0	6	1	6	0	0
931	2021-02-02 10:19:46	2021-02-02 10:24:32	00:04:45.984000	1	2	1	1	5	Principado de Asturias	1	4	4	4	1	1	1	1	1	No	Sí, por confinamiento por contacto estrecho o sospecha de COVID-19	0	0	2	0	0	0	2	0	0	0	22	13	27	62	1	2	1	2	4	1	3	1	0	1	3	1	5	3	5
963	2021-02-02 15:49:54	2021-02-02 15:53:58	00:04:03.043000	1	1	1	1	5	Principado de Asturias	1	3	4	4	1	1	1	1	1	No	No	1	0	0	0	0	0	0	0	0	0	15	3	25	43	1	3	3	2	4	1	0	6	1	1	1	2	3	1	1
997	2021-02-02 20:25:37	2021-02-02 20:40:25	00:14:48.019000	1	2	1	1	5	Principado de Asturias	1	4	4	4	2	1	1	2	1	No	Sí, por confinamiento por contacto estrecho o sospecha de COVID-19	1	0	0	0	0	0	0	0	0	0	16	8	48	72	3	3	2	3	2	2	1	6	1	1	6	1	6	0	1
1003	2021-02-02 22:11:39	2021-02-02 22:15:55	00:04:16.003000	1	1	1	1	5	Principado de Asturias	1	3	4	4	2	1	1	1	1	No	No	1	0	0	0	0	0	0	0	0	0	13	15	35	63	2	3	1	2	1	5	0	6	1	3	1	1	6	4	5
1055	2021-02-03 15:33:56	2021-02-03 15:38:14	00:04:17.990000	1	2	1	1	5	Principado de Asturias	1	4	4	4	1	1	1	1	1	No	No	0	0	0	0	1	1	0	1	0	0	35	1	45	81	3	1	3	3	5	3	2	6	0	2	6	5	5	0	0
1103	2021-02-04 08:11:58	2021-02-04 08:16:21	00:04:24.038000	1	2	1	1	5	Principado de Asturias	1	3	4	4	3	2	2	2	1	No	Sí, por confinamiento por contacto estrecho o sospecha de COVID-19	0	0	1	0	1	1	0	1	0	0	32	5	45	82	3	1	3	3	3	6	3	6	0	1	6	5	6	0	0
[truncated: 12 more columns]
